# Supplementary material for: Linking genotypic and phenotypic changes in the E. coli long-term evolution experiment using metabolomics
Source: eLife. 2023 Nov 22;12:RP87039. doi: 10.7554/eLife.87039 (PMC10665018; doi:10.7554/eLife.87039)
Supplement: Supplementary file 1. — This table contains the finalized data using for the analysis, including the imputed values. It contains the following columns; charge - the ionization mode of the instrument; line - the name of the strain; phase - (e)xponential or (s)tationary growth phase; repl - replicate; compound - name of the compound; is_standard- was this compound a calibratrion standard?; was_imputed - was this value imputed?; peak_area - the raw peak area; n_peak_area - the normalized peak area. [file elife-87039-supp1.csv]

charge	line	phase	repl	compound	is_standard	was_imputed	peak_area	n_peak_area
negative	am1	e	r1	GTP	FALSE	FALSE	24172.378035027712	2.703489736122851e-5
negative	am1	e	r1	CTP	FALSE	FALSE	19444.30440943568	2.1746920108887578e-5
negative	am1	e	r1	UTP	FALSE	FALSE	76712.84063448221	8.579725874865207e-5
negative	am1	e	r1	Fructose-1 6-bisphosphate	FALSE	FALSE	243646.3430517762	2.724992082822144e-4
negative	am1	e	r1	Thiamine pyrophosphate	FALSE	FALSE	86532.65300502295	9.677994399208954e-5
negative	am1	e	r1	ATP	FALSE	FALSE	258223.49526123394	2.8880260272816523e-4
negative	am1	e	r1	Glutathione disulfide	FALSE	FALSE	889758.98059332	9.951252078597627e-4
negative	am1	e	r1	Lysine	FALSE	FALSE	213984.84560501485	2.3932516401186898e-4
negative	am1	e	r1	NADP+	FALSE	FALSE	241586.2004172209	2.70195101313757e-4
negative	am1	e	r1	Pyridoxamine 5-phosphate	FALSE	FALSE	12249.381740342593	1.3699966863367359e-5
negative	am1	e	r1	Arginine	FALSE	FALSE	84977.33507911352	9.504044362393752e-5
negative	am1	e	r1	Ornithine	FALSE	FALSE	15547.487528033396	1.7388637929469703e-5
negative	am1	e	r1	NADPH	FALSE	FALSE	60869.56945084517	6.80778101410279e-5
negative	am1	e	r1	Glucose-6-phosphate	FALSE	FALSE	949791.9898179633	0.001062267391401741
negative	am1	e	r1	ADP	FALSE	FALSE	1102541.88479198	0.0012331060952552424
negative	am1	e	r1	Isocitrate	FALSE	FALSE	503144975.53610235	0.5627279513718213
negative	am1	e	r1	GMP	FALSE	FALSE	265347.0422251308	2.967697278797648e-4
negative	am1	e	r1	CMP	FALSE	FALSE	310990.98260968796	3.478188733825532e-4
negative	am1	e	r1	Aconitate	FALSE	FALSE	6337184.233759062	0.0070876404907538664
negative	am1	e	r1	UDP-D-Glucose	FALSE	FALSE	3028003.2536922307	0.0033865826959354676
negative	am1	e	r1	UMP	FALSE	FALSE	807653.3373712171	9.032965249692895e-4
negative	am1	e	r1	NAD+	FALSE	FALSE	1557201.322046809	0.00174160679811065
negative	am1	e	r1	ADP-D-Glucose	FALSE	FALSE	1788.9118488202994	2.000756737754986e-6
negative	am1	e	r1	Dihydroxyacetone phosphate	FALSE	FALSE	48212.58056376324	5.392196684879479e-5
negative	am1	e	r1	UDP-N-acetyl-glucosamine	FALSE	FALSE	1767543.3976532512	0.001976857811334406
negative	am1	e	r1	5-Aminoimidazole-4-carboxamide ribonucleotide	FALSE	FALSE	70353.13484988007	7.868442968048243e-5
negative	am1	e	r1	Glycerol-3-phosphate	FALSE	FALSE	246000.5688111002	2.7513222401927826e-4
negative	am1	e	r1	AMP	FALSE	FALSE	1227836.5463659295	0.0013732382870757192
negative	am1	e	r1	Deoxyribose phosphate	FALSE	FALSE	38988.598478989225	4.36056707623146e-5
negative	am1	e	r1	N-carbomoyl-L-aspartate	FALSE	FALSE	8727817.659417959	0.009761375329641275
negative	am1	e	r1	Tartaric acid	FALSE	FALSE	80467.64377868678	8.99967097694863e-5
negative	am1	e	r1	Malate	FALSE	FALSE	62576434.95760321	0.06998680451956017
negative	am1	e	r1	Aminoadipic acid	FALSE	FALSE	108431.25048370993	1.2127179722776483e-4
negative	am1	e	r1	Galacturonic acid	FALSE	FALSE	44467.90295476029	4.973384044006559e-5
negative	am1	e	r1	NADH	FALSE	FALSE	44452.2720480416	4.971635850435408e-5
negative	am1	e	r1	Glutathione	FALSE	FALSE	2837195.734869201	0.0031731795429789707
negative	am1	e	r1	Aspartate	FALSE	FALSE	357366.2599631452	3.9968596157439085e-4
negative	am1	e	r1	Glutamate	FALSE	FALSE	42289179.742617406	0.04729711045291017
negative	am1	e	r1	Malonic acid	FALSE	FALSE	6393010.176287128	0.007150077402180333
negative	am1	e	r1	2-Hydroxyglutarate	FALSE	FALSE	10339987.670092296	0.011564460268337561
negative	am1	e	r1	N-Acetylaspartate	FALSE	FALSE	2646889.4455686193	0.002960336975690717
negative	am1	e	r1	FAD	FALSE	FALSE	17492.66185415509	1.9564161917229334e-5
negative	am1	e	r1	Glucuronic acid	FALSE	FALSE	28919.669988552614	3.234436879682136e-5
negative	am1	e	r1	Succinate	FALSE	FALSE	28580335.66060785	0.03196485012828844
negative	am1	e	r1	N-acetyl-glutamate	FALSE	FALSE	1145367.6029785697	0.0012810032816188521
negative	am1	e	r1	Inositol	FALSE	FALSE	16437.61059305511	1.8384170337032293e-5
negative	am1	e	r1	Glycerophosphocholine (+HAc)	FALSE	FALSE	30534.685088259106	3.415063574309077e-5
negative	am1	e	r1	Acetyllysine	FALSE	FALSE	42497.01101162296	4.7529553327081554e-5
negative	am1	e	r1	N-acetyl-L-ornithine	FALSE	FALSE	86543.29102896954	9.679184178241474e-5
negative	am1	e	r1	Fumarate	FALSE	FALSE	4745530.46758888	0.005307501352574351
negative	am1	e	r1	a-ketoglutarate	FALSE	FALSE	979518.8684046026	0.001095514559317737
negative	am1	e	r1	Asparagine	FALSE	FALSE	147700.5142003291	1.6519136991074258e-4
negative	am1	e	r1	Serine	FALSE	FALSE	269621.90497067076	3.0155082452617426e-4
negative	am1	e	r1	S-adenosyl-L-homocysteine	FALSE	FALSE	6063.52611496838	6.781575479572417e-6
negative	am1	e	r1	Glutamine	FALSE	FALSE	4754822.432082158	0.00531789368162017
negative	am1	e	r1	Histidine	FALSE	FALSE	12123.5346935515	1.355921687227088e-5
negative	am1	e	r1	Methionine sulfoxide	FALSE	FALSE	13066.987647964203	1.461439455279262e-5
negative	am1	e	r1	Glycine	FALSE	FALSE	92970.30366873206	1.0397994825681767e-4
negative	am1	e	r1	Threonine	FALSE	FALSE	332368.19267529197	3.7172759593999286e-4
negative	am1	e	r1	Alanine	FALSE	FALSE	872126.5568464523	9.754047332943107e-4
negative	am1	e	r1	Threonic acid	FALSE	FALSE	198121.07487158303	2.2158278827544306e-4
negative	am1	e	r1	Glucose	FALSE	FALSE	1015721.3373520292	0.0011360041640557763
negative	am1	e	r1	Thiamine	FALSE	FALSE	17793460.134477515	0.019900581057421783
negative	am1	e	r1	Proline	FALSE	FALSE	171477.9109476961	1.917845118701633e-4
negative	am1	e	r1	Sorbitol	FALSE	FALSE	873639.5633909845	9.770969117212334e-4
negative	am1	e	r1	Pipecolic acid	FALSE	FALSE	4519.669300989869	5.054893460705238e-6
negative	am1	e	r1	Pyridoxamine	FALSE	FALSE	14477.659508122708	1.6192119710594404e-5
negative	am1	e	r1	Valine	FALSE	FALSE	2960395.1172696524	0.0033109683303848485
negative	am1	e	r1	Tyrosine	FALSE	FALSE	128269.4180235461	1.4345922216779972e-4
negative	am1	e	r1	Glycerate	FALSE	FALSE	166142.20426524305	1.8581694499276673e-4
negative	am1	e	r1	Acetyl glycine	FALSE	FALSE	40210.092107459364	4.497181499625104e-5
negative	am1	e	r1	Methionine	FALSE	FALSE	154532.84331744091	1.728327908810579e-4
negative	am1	e	r1	Pantothenate	FALSE	FALSE	30881.78750317921	3.453884240391668e-5
negative	am1	e	r1	Isoleucine	FALSE	FALSE	406839.2600050458	4.5501760814829e-4
negative	am1	e	r1	D-Xylose	FALSE	FALSE	34235.48278972713	3.828968593785758e-5
negative	am1	e	r1	Xanthine	FALSE	FALSE	31248.007301279315	3.494843034925409e-5
negative	am1	e	r1	Lactate	FALSE	FALSE	19037930.34167641	0.021292422781557317
negative	am1	e	r1	N-Acetyl-L-alanine	FALSE	FALSE	84901.78957913017	9.495595194359093e-5
negative	am1	e	r1	Leucine	FALSE	FALSE	436683.35874460294	4.883958775553435e-4
negative	am1	e	r1	Pterin	FALSE	FALSE	114153.66874907706	1.2767187049478223e-4
negative	am1	e	r1	Phenylalanine	FALSE	FALSE	289763.53573230206	3.2407764913314517e-4
negative	am1	e	r1	Guanine	FALSE	FALSE	7029.16362004949	7.86156482940763e-6
negative	am1	e	r1	Tryptophan	FALSE	FALSE	83010.28680156263	9.284045534760372e-5
negative	am1	e	r1	Acetylcholine	FALSE	FALSE	1240.8594910417598	1.387803423039663e-6
negative	am1	e	r1	2-Hydroxybutyric acid	FALSE	FALSE	1444402.93754854	0.001615450706103313
negative	am1	e	r1	Nicotinate	FALSE	FALSE	53901.679295732436	6.028477484699042e-5
negative	am1	e	r1	5-Methylcytosine	FALSE	FALSE	3074.373390628279	3.4384440349760698e-6
negative	am1	e	r1	Creatinine	FALSE	FALSE	31529.25491248279	3.526298360880342e-5
negative	am1	e	r1	Hypoxanthine	FALSE	FALSE	5886.515608480425	6.583603196174134e-6
negative	am1	e	r1	Acetyl-Methionine	FALSE	TRUE	1136.2146105078596	1.2707663818138279e-6
negative	am1	e	r1	Uridine	FALSE	FALSE	8080.611929973478	9.037526793027467e-6
negative	am1	e	r1	Hydroxyphenyllactic acid	FALSE	FALSE	13262.742818545104	1.4833331263815242e-5
negative	am1	e	r1	2-Hydroxy-3-methylbutyric acid	FALSE	FALSE	1586694.3659961296	0.0017745924404369729
negative	am1	e	r1	Pyruvate	FALSE	FALSE	1112132.4128040597	0.001243832344036841
negative	am1	e	r1	Adenine	FALSE	FALSE	75904.90212818446	8.489364328474146e-5
negative	am1	e	r1	Acetyl leucine	FALSE	FALSE	39400.7403746227	4.4066618949976045e-5
negative	am1	e	r1	Phenylethanolamine	FALSE	FALSE	1200896.5349840391	0.0013431080102132467
negative	am1	e	r1	1-Methyladenosine	FALSE	FALSE	93918.67962108806	1.050406319220594e-4
negative	am1	e	r1	3 4-Dimethoxyphenylacetic acid	FALSE	FALSE	336302.0329860207	3.761272859035498e-4
negative	am1	e	r1	Hydroxy-methoxycinnamic acid	FALSE	FALSE	242537.60471216013	2.71259171941208e-4
negative	am1	e	r1	4-Hydroxy-3-methylbenzoic acid	FALSE	FALSE	397668.7475793209	4.447611136561022e-4
negative	am1	e	r1	Phenylacetylglycine	FALSE	FALSE	28754.477783120714	3.215961435055816e-5
negative	am1	e	r1	Leucic acid	FALSE	FALSE	902902.9657927105	0.0010098257180978579
negative	am1	e	r1	Phenylpropanolamine	FALSE	FALSE	29705.90537300302	3.322371103156473e-5
negative	am1	e	r1	Acetyl-Phenylalanine	FALSE	FALSE	13435.280695986796	1.5026301264565728e-5
negative	am1	e	r1	2-hydroxy pyridine	FALSE	FALSE	34496.44050562198	3.8581546550603856e-5
negative	am1	e	r1	Phenyllactic acid	FALSE	FALSE	106791.20108531509	1.1943753139389863e-4
negative	am1	e	r1	Hydroxyoctanoic acid	FALSE	FALSE	599094.2489331142	6.700396421956942e-4
negative	am1	e	r1	Cresol	FALSE	FALSE	32640.72652540522	3.650607690031716e-5
negative	am1	e	r1	Hydroxyphenyl pyruvate	FALSE	FALSE	82316.19844643737	9.206417229372942e-5
negative	am1	e	r1	3-Phenylbutyric acid	FALSE	FALSE	135949.24822506405	1.5204850622371006e-4
negative	am1	e	r1	Pyridoxic acid	FALSE	FALSE	31691.022761301127	3.544390818241438e-5
negative	am1	e	r1	2 3-dihydroxybenzoic acid	FALSE	FALSE	446388.1795117673	4.99249953764528e-4
negative	am1	e	r1	5- Methylthioadenosine	FALSE	FALSE	98150.9902708409	1.0977413740716718e-4
negative	am1	e	r1	Methylphenyllactate	FALSE	FALSE	189179.18678094007	2.1158199206102764e-4
negative	am1	e	r1	Phenyl-pyruvate	FALSE	FALSE	261101.2981582778	2.9202119817767734e-4
negative	am1	e	r1	Undecanoic acid	FALSE	FALSE	213670.7754191968	2.3897390129268143e-4
negative	am1	e	r1	6-Phosphogluconate	FALSE	FALSE	120710.317746351	1.3500496500530335e-4
negative	am1	e	r1	CDP	FALSE	FALSE	111986.881865702	1.252484903494438e-4
negative	am1	e	r1	Carbamoyl phosphate	FALSE	FALSE	1708166.723446191	0.0019104496867174217
negative	am1	e	r1	Citrulline	FALSE	FALSE	284413.758904308	3.1809434590825283e-4
negative	am1	e	r1	Cytosine	FALSE	FALSE	62060.337049565824	6.94095897353169e-5
negative	am1	e	r1	N-acetyl-glutamine	FALSE	FALSE	1544.7730817345107	1.7277067920484919e-6
negative	am1	e	r1	Orotate	FALSE	FALSE	550203.7932945183	6.153595255676232e-4
negative	am1	e	r1	Phosphoenolpyruvate	FALSE	FALSE	2957803.943115631	0.003308070306566194
negative	am1	e	r1	Thymine	FALSE	FALSE	25208.350737852594	2.8193551079506463e-5
negative	am1	e	r1	UDP	FALSE	FALSE	296518.0286800412	3.316320164901614e-4
negative	am1	e	r1	Xylose-5-phosphate	FALSE	FALSE	96948.46649091213	1.0842920945189108e-4
negative	am1	e	r1	Ribulose-5-phosphate	FALSE	FALSE	342536.6759869113	3.8310024211699024e-4
negative	am1	e	r1	Succinyl-CoA	FALSE	FALSE	121263.223217244	1.356233461440723e-4
negative	am1	e	r1	Coenzyme A	FALSE	FALSE	263806.00409924984	2.9504619834110876e-4
negative	am1	e	r1	Acetyl CoA	FALSE	FALSE	1551897.063537341	0.0017356744035331249
negative	am1	e	r1	Propionyl CoA	FALSE	FALSE	2540.189288885331	2.841001270276064e-6
negative	am1	e	r1	Butyryl CoA	FALSE	FALSE	11195.254511979492	1.2521008740869998e-5
negative	am1	e	r1	Itaconic acid	FALSE	FALSE	380730.2879478821	4.2581678319222795e-4
negative	am1	e	r1	NegIS_Alanine-2H4-15N	TRUE	FALSE	79480432.05044253	0.0888925913534906
negative	am1	e	r1	NegIS_Glucose-2H7-13C6	TRUE	FALSE	10950635.869068911	0.012247422091921043
negative	am1	e	r1	NegIS_Glutamine-2H5-15N2	TRUE	FALSE	16751652.82494198	0.018735401791953682
negative	am1	e	r1	NegIS_Glycine-13C2_15N1	TRUE	FALSE	2280142.405259711	0.0025501593515480665
negative	am1	e	r1	NegIS_Inosine-15N4	TRUE	FALSE	1203431.0247768892	0.0013459426370469613
negative	am1	e	r1	NegIS_Lysine-2H8	TRUE	FALSE	152072.9439319201	1.700815875319238e-4
negative	am1	e	r1	NegIS_Malate-2H3	TRUE	FALSE	15887068.782373415	0.017768432765690463
negative	am1	e	r1	NegIS_Serine-13C3-15N1	TRUE	FALSE	571618.3451536696	6.393100119744604e-4
negative	am1	e	r1	NegIS_Thymine-2H4	TRUE	FALSE	2226213.0593367405	0.002489843633761716
negative	am1	e	r2	GTP	FALSE	FALSE	28765.594037994582	2.953012243637146e-5
negative	am1	e	r2	CTP	FALSE	FALSE	41981.9151346668	4.309770527952898e-5
negative	am1	e	r2	UTP	FALSE	FALSE	121749.279414645	1.249851166955116e-4
negative	am1	e	r2	Fructose-1 6-bisphosphate	FALSE	FALSE	231264.85235772422	2.3741138098287205e-4
negative	am1	e	r2	Thiamine pyrophosphate	FALSE	FALSE	125950.50248801691	1.2929799935579373e-4
negative	am1	e	r2	ATP	FALSE	FALSE	394905.627713757	4.054013806145047e-4
negative	am1	e	r2	Glutathione disulfide	FALSE	FALSE	1176254.4285419798	0.0012075167731731772
negative	am1	e	r2	Lysine	FALSE	FALSE	116517.92277146991	1.196147217028951e-4
negative	am1	e	r2	NADP+	FALSE	FALSE	245318.14346541782	2.518381787224224e-4
negative	am1	e	r2	Pyridoxamine 5-phosphate	FALSE	FALSE	5523.977854866448	5.670793454658067e-6
negative	am1	e	r2	Arginine	FALSE	FALSE	75485.27077833434	7.74915089631943e-5
negative	am1	e	r2	Ornithine	FALSE	FALSE	18181.981623687392	1.866522008112078e-5
negative	am1	e	r2	NADPH	FALSE	FALSE	75255.48632187316	7.72556173238869e-5
negative	am1	e	r2	Glucose-6-phosphate	FALSE	FALSE	1120646.1749146709	0.0011504305702629137
negative	am1	e	r2	ADP	FALSE	FALSE	1507401.5338300013	0.0015474650652435261
negative	am1	e	r2	Isocitrate	FALSE	FALSE	544968002.1452451	0.5594520942622524
negative	am1	e	r2	GMP	FALSE	FALSE	213846.51245726316	2.1953009860019095e-4
negative	am1	e	r2	CMP	FALSE	FALSE	311814.8261522869	3.201022020122638e-4
negative	am1	e	r2	Aconitate	FALSE	FALSE	6632995.554135054	0.006809286489088308
negative	am1	e	r2	UDP-D-Glucose	FALSE	FALSE	3458213.039753538	0.003550124997943473
negative	am1	e	r2	UMP	FALSE	FALSE	750898.4119673789	7.708556970311565e-4
negative	am1	e	r2	NAD+	FALSE	FALSE	1548774.1183976696	0.0015899372452436564
negative	am1	e	r2	ADP-D-Glucose	FALSE	FALSE	1962.5652831625996	2.0147261003758486e-6
negative	am1	e	r2	Dihydroxyacetone phosphate	FALSE	FALSE	60368.53786347985	6.197300539174152e-5
negative	am1	e	r2	UDP-N-acetyl-glucosamine	FALSE	FALSE	1559439.2758812604	0.00160088585996295
negative	am1	e	r2	5-Aminoimidazole-4-carboxamide ribonucleotide	FALSE	FALSE	77261.22862941395	7.931466800225137e-5
negative	am1	e	r2	Glycerol-3-phosphate	FALSE	FALSE	287764.3327015619	2.954124975230402e-4
negative	am1	e	r2	AMP	FALSE	FALSE	1111922.219082399	0.0011414747502121888
negative	am1	e	r2	Deoxyribose phosphate	FALSE	FALSE	55029.359748770345	5.64919232618639e-5
negative	am1	e	r2	N-carbomoyl-L-aspartate	FALSE	FALSE	5326735.745234502	0.00546830906864656
negative	am1	e	r2	Tartaric acid	FALSE	FALSE	94410.70679053306	9.691994287155603e-5
negative	am1	e	r2	Malate	FALSE	FALSE	83061378.56436838	0.08526897360436357
negative	am1	e	r2	Aminoadipic acid	FALSE	FALSE	87615.18632591492	8.994381190502753e-5
negative	am1	e	r2	Galacturonic acid	FALSE	FALSE	41202.8691084721	4.2297953864463054e-5
negative	am1	e	r2	NADH	FALSE	FALSE	88148.96574948727	9.049177805206024e-5
negative	am1	e	r2	Glutathione	FALSE	FALSE	6337546.47222762	0.006505984998046049
negative	am1	e	r2	Aspartate	FALSE	FALSE	510231.805797532	5.23792683586883e-4
negative	am1	e	r2	Glutamate	FALSE	FALSE	55510662.48117531	0.05698601799872578
negative	am1	e	r2	Malonic acid	FALSE	FALSE	5702801.400112724	0.0058543697499591
negative	am1	e	r2	2-Hydroxyglutarate	FALSE	FALSE	9966357.4102704525	0.010231242024106739
negative	am1	e	r2	N-Acetylaspartate	FALSE	FALSE	1992367.1171364286	0.0020453200038048265
negative	am1	e	r2	FAD	FALSE	FALSE	44431.3117467854	4.5612201651672685e-5
negative	am1	e	r2	Glucuronic acid	FALSE	FALSE	31279.816731386076	3.211116782935339e-5
negative	am1	e	r2	Succinate	FALSE	FALSE	34650824.85303776	0.03557177018767398
negative	am1	e	r2	N-acetyl-glutamate	FALSE	FALSE	2277963.6293534017	0.002338507064778723
negative	am1	e	r2	Inositol	FALSE	FALSE	20035.00423582651	2.0567492098919436e-5
negative	am1	e	r2	Glycerophosphocholine (+HAc)	FALSE	FALSE	37223.52508285162	3.821284732580427e-5
negative	am1	e	r2	Acetyllysine	FALSE	FALSE	81782.62940479472	8.395623800788186e-5
negative	am1	e	r2	N-acetyl-L-ornithine	FALSE	FALSE	73282.18732732182	7.522987223286941e-5
negative	am1	e	r2	Fumarate	FALSE	FALSE	5809232.938189723	0.005963630012283382
negative	am1	e	r2	a-ketoglutarate	FALSE	FALSE	1584153.0884779391	0.0016262565132122977
negative	am1	e	r2	Asparagine	FALSE	FALSE	189205.33620889016	1.94234012219025e-4
negative	am1	e	r2	Serine	FALSE	FALSE	268424.32979123184	2.7555847840883443e-4
negative	am1	e	r2	S-adenosyl-L-homocysteine	FALSE	FALSE	7223.130422196425	7.4151058886392555e-6
negative	am1	e	r2	Glutamine	FALSE	FALSE	6416930.527976071	0.006587478913403792
negative	am1	e	r2	Histidine	FALSE	FALSE	6813.995249087555	6.995096771533143e-6
negative	am1	e	r2	Methionine sulfoxide	FALSE	FALSE	7344.505258554294	7.539706610376769e-6
negative	am1	e	r2	Glycine	FALSE	FALSE	89246.7537032428	9.161874287819093e-5
negative	am1	e	r2	Threonine	FALSE	FALSE	366385.931673172	3.761236916220862e-4
negative	am1	e	r2	Alanine	FALSE	FALSE	981190.3109051703	0.0010072682655585113
negative	am1	e	r2	Threonic acid	FALSE	FALSE	173743.8011953109	1.7836154244133947e-4
negative	am1	e	r2	Glucose	FALSE	FALSE	1596470.4763819699	0.0016389012711276697
negative	am1	e	r2	Thiamine	FALSE	FALSE	20872110.904899027	0.021426847285444132
negative	am1	e	r2	Proline	FALSE	FALSE	188003.46325686402	1.9300019603642099e-4
negative	am1	e	r2	Sorbitol	FALSE	FALSE	1120871.7039432498	0.0011506620933741031
negative	am1	e	r2	Pipecolic acid	FALSE	FALSE	6170.439624912799	6.334436805624061e-6
negative	am1	e	r2	Pyridoxamine	FALSE	FALSE	11786.791402126697	1.2100059285305739e-5
negative	am1	e	r2	Valine	FALSE	FALSE	3796355.4370871317	0.0038972545020656596
negative	am1	e	r2	Tyrosine	FALSE	FALSE	127403.68786398691	1.307898073128433e-4
negative	am1	e	r2	Glycerate	FALSE	FALSE	166258.7457271921	1.7067755009532256e-4
negative	am1	e	r2	Acetyl glycine	FALSE	FALSE	34201.20257033068	3.5110197899581346e-5
negative	am1	e	r2	Methionine	FALSE	FALSE	149323.63907032213	1.5329234426957687e-4
negative	am1	e	r2	Pantothenate	FALSE	FALSE	42793.88883149613	4.393125951278461e-5
negative	am1	e	r2	Isoleucine	FALSE	FALSE	446747.19626944105	4.586207879634663e-4
negative	am1	e	r2	D-Xylose	FALSE	FALSE	29807.1619079244	3.059937296824618e-5
negative	am1	e	r2	Xanthine	FALSE	FALSE	14319.116962510103	1.4699688681038125e-5
negative	am1	e	r2	Lactate	FALSE	FALSE	5439656.378371544	0.0055842308923963165
negative	am1	e	r2	N-Acetyl-L-alanine	FALSE	FALSE	67127.07416218416	6.891116923177161e-5
negative	am1	e	r2	Leucine	FALSE	FALSE	338604.1891021273	3.47603569335194e-4
negative	am1	e	r2	Pterin	FALSE	FALSE	128684.32947807496	1.3210448566126128e-4
negative	am1	e	r2	Phenylalanine	FALSE	FALSE	280280.14215780975	2.877293930892427e-4
negative	am1	e	r2	Guanine	FALSE	FALSE	2069.383442431451	2.1243832594621732e-6
negative	am1	e	r2	Tryptophan	FALSE	FALSE	96820.3687772524	9.939364855634406e-5
negative	am1	e	r2	Acetylcholine	FALSE	FALSE	1175.0084012010402	1.2062376290717757e-6
negative	am1	e	r2	2-Hydroxybutyric acid	FALSE	FALSE	1316852.0013645692	0.0013518511308862075
negative	am1	e	r2	Nicotinate	FALSE	FALSE	70164.70583599314	7.202953470427665e-5
negative	am1	e	r2	5-Methylcytosine	FALSE	FALSE	3865.3296956219833	3.968061949907752e-6
negative	am1	e	r2	Creatinine	FALSE	FALSE	10949.250541022304	1.124025836684708e-5
negative	am1	e	r2	Hypoxanthine	FALSE	FALSE	923.7911189367613	9.483435249695603e-7
negative	am1	e	r2	Acetyl-Methionine	FALSE	FALSE	2954.823814955409	3.033356756626973e-6
negative	am1	e	r2	Uridine	FALSE	FALSE	7742.4310118726835	7.948208385120461e-6
negative	am1	e	r2	Hydroxyphenyllactic acid	FALSE	FALSE	10962.380092906506	1.1253736874336375e-5
negative	am1	e	r2	2-Hydroxy-3-methylbutyric acid	FALSE	FALSE	1815400.5645051415	0.0018636500560386857
negative	am1	e	r2	Pyruvate	FALSE	FALSE	1180414.8271852506	0.0012117877463767074
negative	am1	e	r2	Adenine	FALSE	FALSE	43381.0946331901	4.453407199760474e-5
negative	am1	e	r2	Acetyl leucine	FALSE	FALSE	53192.46797606733	5.460621080695556e-5
negative	am1	e	r2	Phenylethanolamine	FALSE	FALSE	1179485.6821844794	0.0012108339066750947
negative	am1	e	r2	1-Methyladenosine	FALSE	FALSE	42708.94460945729	4.384405765372493e-5
negative	am1	e	r2	3 4-Dimethoxyphenylacetic acid	FALSE	FALSE	418441.5430618472	4.2956283060796476e-4
negative	am1	e	r2	Hydroxy-methoxycinnamic acid	FALSE	FALSE	265149.406117461	2.7219651421895924e-4
negative	am1	e	r2	4-Hydroxy-3-methylbenzoic acid	FALSE	FALSE	365999.2326381312	3.757267149479491e-4
negative	am1	e	r2	Phenylacetylglycine	FALSE	FALSE	22372.808306172883	2.2967430036526126e-5
negative	am1	e	r2	Leucic acid	FALSE	FALSE	499827.95061432495	5.131123160281743e-4
negative	am1	e	r2	Phenylpropanolamine	FALSE	FALSE	32023.7727760299	3.2874896645681433e-5
negative	am1	e	r2	Acetyl-Phenylalanine	FALSE	FALSE	27440.244483399907	2.8169547905337034e-5
negative	am1	e	r2	2-hydroxy pyridine	FALSE	FALSE	49027.9695912996	5.033102889950639e-5
negative	am1	e	r2	Phenyllactic acid	FALSE	FALSE	124824.033642266	1.281415913604697e-4
negative	am1	e	r2	Hydroxyoctanoic acid	FALSE	FALSE	472554.83546627406	4.851143394009776e-4
negative	am1	e	r2	Cresol	FALSE	FALSE	29251.63828577701	3.002908470801971e-5
negative	am1	e	r2	Hydroxyphenyl pyruvate	FALSE	FALSE	79789.24686645184	8.190987559513143e-5
negative	am1	e	r2	3-Phenylbutyric acid	FALSE	FALSE	133417.4896861181	1.3696344321554855e-4
negative	am1	e	r2	Pyridoxic acid	FALSE	FALSE	24766.668124715387	2.5424913565067165e-5
negative	am1	e	r2	2 3-dihydroxybenzoic acid	FALSE	FALSE	298125.23574072606	3.0604877136093726e-4
negative	am1	e	r2	5- Methylthioadenosine	FALSE	FALSE	159708.552409902	1.6395326655068267e-4
negative	am1	e	r2	Methylphenyllactate	FALSE	FALSE	198069.98928787294	2.0333426895047154e-4
negative	am1	e	r2	Phenyl-pyruvate	FALSE	FALSE	247689.17792992812	2.5427223024749657e-4
negative	am1	e	r2	Undecanoic acid	FALSE	FALSE	151363.9956510119	1.553869291949583e-4
negative	am1	e	r2	6-Phosphogluconate	FALSE	FALSE	143262.62967626489	1.470702461179412e-4
negative	am1	e	r2	CDP	FALSE	FALSE	142348.5084117461	1.4613182945158362e-4
negative	am1	e	r2	Carbamoyl phosphate	FALSE	FALSE	1831926.2419146092	0.0018806149508571617
negative	am1	e	r2	Citrulline	FALSE	FALSE	351483.3972776931	3.6082507951174826e-4
negative	am1	e	r2	Cytosine	FALSE	FALSE	52544.32825274989	5.394084490628409e-5
negative	am1	e	r2	N-acetyl-glutamine	FALSE	FALSE	218301.93680196317	2.2410393866173113e-4
negative	am1	e	r2	Orotate	FALSE	FALSE	837612.3817003233	8.598743399201381e-4
negative	am1	e	r2	Phosphoenolpyruvate	FALSE	FALSE	4059150.5969220297	0.004167034199135714
negative	am1	e	r2	Thymine	FALSE	FALSE	22275.3745762811	2.2867406725019458e-5
negative	am1	e	r2	UDP	FALSE	FALSE	350386.2666664561	3.596987894989043e-4
negative	am1	e	r2	Xylose-5-phosphate	FALSE	FALSE	132320.1428437891	1.3583693122464933e-4
negative	am1	e	r2	Ribulose-5-phosphate	FALSE	FALSE	370297.25804660696	3.8013897274381743e-4
negative	am1	e	r2	Succinyl-CoA	FALSE	FALSE	211711.10068868907	2.1733793212190541e-4
negative	am1	e	r2	Coenzyme A	FALSE	FALSE	663336.6606688304	6.809667403430398e-4
negative	am1	e	r2	Acetyl CoA	FALSE	FALSE	1202238.48636185	0.0012341914320660558
negative	am1	e	r2	Propionyl CoA	FALSE	FALSE	4869.627974597158	4.9990523442518424e-6
negative	am1	e	r2	Butyryl CoA	FALSE	FALSE	9655.911837233614	9.912545467049771e-6
negative	am1	e	r2	Itaconic acid	FALSE	FALSE	346257.8442770172	3.554606424101231e-4
negative	am1	e	r2	NegIS_Alanine-2H4-15N	TRUE	FALSE	81737594.52287707	0.08391000619444602
negative	am1	e	r2	NegIS_Glucose-2H7-13C6	TRUE	FALSE	10999979.220044797	0.011292335306422565
negative	am1	e	r2	NegIS_Glutamine-2H5-15N2	TRUE	FALSE	17398169.864232972	0.017860576269726352
negative	am1	e	r2	NegIS_Glycine-13C2_15N1	TRUE	FALSE	2131803.520347682	0.002188462330484294
negative	am1	e	r2	NegIS_Inosine-15N4	TRUE	FALSE	1254716.8035869512	0.0012880645115117676
negative	am1	e	r2	NegIS_Lysine-2H8	TRUE	FALSE	162366.69851788698	1.666820605369595e-4
negative	am1	e	r2	NegIS_Malate-2H3	TRUE	FALSE	14039846.723341092	0.014412996032014335
negative	am1	e	r2	NegIS_Serine-13C3-15N1	TRUE	FALSE	550093.843205249	5.647141692915866e-4
negative	am1	e	r2	NegIS_Thymine-2H4	TRUE	FALSE	2407837.212536991	0.0024718324119833044
negative	am2	e	r1	GTP	FALSE	FALSE	2458.7371428097204	3.7263164295508027e-6
negative	am2	e	r1	CTP	FALSE	FALSE	10758.944537856809	1.6305619294556823e-5
negative	am2	e	r1	UTP	FALSE	FALSE	22191.466712076584	3.3632072971632906e-5
negative	am2	e	r1	Fructose-1 6-bisphosphate	FALSE	FALSE	130316.6702603249	1.9750022927643364e-4
negative	am2	e	r1	Thiamine pyrophosphate	FALSE	FALSE	17497.104502615093	2.651757556448469e-5
negative	am2	e	r1	ATP	FALSE	FALSE	114192.85301044803	1.7306392655859547e-4
negative	am2	e	r1	Glutathione disulfide	FALSE	FALSE	554340.6189143893	8.401258190078548e-4
negative	am2	e	r1	Lysine	FALSE	FALSE	204444.45699999397	3.098439136845248e-4
negative	am2	e	r1	NADP+	FALSE	FALSE	62223.50433340372	9.43022588566848e-5
negative	am2	e	r1	Pyridoxamine 5-phosphate	FALSE	FALSE	2102.5640389855594	3.1865215627325454e-6
negative	am2	e	r1	Arginine	FALSE	FALSE	11403.63853702361	1.7282679346768342e-5
negative	am2	e	r1	Ornithine	FALSE	FALSE	3084.6164668975302	4.674862074246848e-6
negative	am2	e	r1	NADPH	FALSE	FALSE	10419.9561465757	1.5791868560546153e-5
negative	am2	e	r1	Glucose-6-phosphate	FALSE	FALSE	919221.7537706764	0.0013931180620478617
negative	am2	e	r1	ADP	FALSE	FALSE	699707.3729856515	0.001060435064178816
negative	am2	e	r1	Isocitrate	FALSE	FALSE	455699751.98530334	0.6906315617067469
negative	am2	e	r1	GMP	FALSE	FALSE	53152.920559132566	8.055541916602199e-5
negative	am2	e	r1	CMP	FALSE	FALSE	114047.23426066298	1.728432354036416e-4
negative	am2	e	r1	Aconitate	FALSE	FALSE	8788944.65086117	0.013320004111334624
negative	am2	e	r1	UDP-D-Glucose	FALSE	FALSE	1903424.4615603813	0.0028847174104248046
negative	am2	e	r1	UMP	FALSE	FALSE	162096.55809169688	2.456639455572218e-4
negative	am2	e	r1	NAD+	FALSE	FALSE	264362.09890263	4.006515439733771e-4
negative	am2	e	r1	ADP-D-Glucose	FALSE	FALSE	52447.19059726187	7.948585662273205e-5
negative	am2	e	r1	Dihydroxyacetone phosphate	FALSE	FALSE	12813.740158651592	1.941974587109148e-5
negative	am2	e	r1	UDP-N-acetyl-glucosamine	FALSE	FALSE	777480.080195572	0.001178302774232521
negative	am2	e	r1	5-Aminoimidazole-4-carboxamide ribonucleotide	FALSE	FALSE	14416.904708395707	2.184940713783358e-5
negative	am2	e	r1	Glycerol-3-phosphate	FALSE	FALSE	111099.43825115194	1.6837573031334437e-4
negative	am2	e	r1	AMP	FALSE	FALSE	477293.7270111372	7.233581116567434e-4
negative	am2	e	r1	Deoxyribose phosphate	FALSE	FALSE	6690.093596426588	1.0139109728138302e-5
negative	am2	e	r1	N-carbomoyl-L-aspartate	FALSE	FALSE	335980.2691312973	5.091918021940999e-4
negative	am2	e	r1	Tartaric acid	FALSE	FALSE	61578.82786071569	9.332522536656675e-5
negative	am2	e	r1	Malate	FALSE	FALSE	3215641.5749607077	0.00487343596991003
negative	am2	e	r1	Aminoadipic acid	FALSE	FALSE	115266.80553037397	1.7469154540807703e-4
negative	am2	e	r1	Galacturonic acid	FALSE	FALSE	24382.337914905198	3.695242764313745e-5
negative	am2	e	r1	NADH	FALSE	FALSE	2528.9482172078897	3.8327241766462635e-6
negative	am2	e	r1	Glutathione	FALSE	FALSE	682252.4196647458	0.0010339813704495198
negative	am2	e	r1	Aspartate	FALSE	FALSE	90705.44339693621	1.3746779925952055e-4
negative	am2	e	r1	Glutamate	FALSE	FALSE	5881958.609262843	0.008914348192010105
negative	am2	e	r1	Malonic acid	FALSE	FALSE	3390201.142078931	0.005137988114001607
negative	am2	e	r1	2-Hydroxyglutarate	FALSE	FALSE	3616029.1652204935	0.00548023969438964
negative	am2	e	r1	N-Acetylaspartate	FALSE	FALSE	100742.28824164697	1.5267904701533335e-4
negative	am2	e	r1	FAD	FALSE	FALSE	4043.0519645170407	6.127410164590098e-6
negative	am2	e	r1	Glucuronic acid	FALSE	FALSE	6168.172581822739	9.348117141828861e-6
negative	am2	e	r1	Succinate	FALSE	FALSE	4836752.581836197	0.007330295824454175
negative	am2	e	r1	N-acetyl-glutamate	FALSE	FALSE	76496.77078412833	1.1593397635614565e-4
negative	am2	e	r1	Inositol	FALSE	FALSE	15507.156853680812	2.3501728734393648e-5
negative	am2	e	r1	Glycerophosphocholine (+HAc)	FALSE	FALSE	30537.076450665507	4.628018494019633e-5
negative	am2	e	r1	Acetyllysine	FALSE	FALSE	807.5062247338918	1.2238086210191155e-6
negative	am2	e	r1	N-acetyl-L-ornithine	FALSE	FALSE	4349.931846487768	6.592499143064374e-6
negative	am2	e	r1	Fumarate	FALSE	FALSE	355379.2945426661	5.385918164734024e-4
negative	am2	e	r1	a-ketoglutarate	FALSE	FALSE	145982.3190625289	2.2124215902355473e-4
negative	am2	e	r1	Asparagine	FALSE	FALSE	60819.01994825713	9.217370548337112e-5
negative	am2	e	r1	Serine	FALSE	FALSE	49649.50011612884	7.524584258335789e-5
negative	am2	e	r1	S-adenosyl-L-homocysteine	FALSE	FALSE	2763.7767444979113	4.188616388193557e-6
negative	am2	e	r1	Glutamine	FALSE	FALSE	697701.2483967106	0.0010573947005363025
negative	am2	e	r1	Histidine	FALSE	FALSE	8314.517765053595	1.260099081445769e-5
negative	am2	e	r1	Methionine sulfoxide	FALSE	FALSE	3827.66906554573	5.8009885959290734e-6
negative	am2	e	r1	Glycine	FALSE	FALSE	21900.474583211693	3.3191062531037336e-5
negative	am2	e	r1	Threonine	FALSE	FALSE	68683.91342409188	1.0409327234775715e-4
negative	am2	e	r1	Alanine	FALSE	FALSE	150765.60186259402	2.2849141921275172e-4
negative	am2	e	r1	Threonic acid	FALSE	FALSE	171325.64257773105	2.5965099954165945e-4
negative	am2	e	r1	Glucose	FALSE	FALSE	1425434.1183563897	0.0021603035485134574
negative	am2	e	r1	Thiamine	FALSE	FALSE	15844623.946595078	0.02401317387867701
negative	am2	e	r1	Proline	FALSE	FALSE	31661.855759346698	4.798483386121435e-5
negative	am2	e	r1	Sorbitol	FALSE	FALSE	638791.13365904	9.6811401876206e-4
negative	am2	e	r1	Pipecolic acid	FALSE	FALSE	5200.062467860789	7.880906775799957e-6
negative	am2	e	r1	Pyridoxamine	FALSE	FALSE	5960.772993981825	9.033794606817858e-6
negative	am2	e	r1	Valine	FALSE	FALSE	844959.2146981296	0.0012805701549828707
negative	am2	e	r1	Tyrosine	FALSE	FALSE	43596.012048865436	6.607153450121939e-5
negative	am2	e	r1	Glycerate	FALSE	FALSE	137928.98964900288	2.090370098094693e-4
negative	am2	e	r1	Acetyl glycine	FALSE	FALSE	16021.217242506487	2.4280808221708582e-5
negative	am2	e	r1	Methionine	FALSE	FALSE	12443.554634961904	1.8858714610413322e-5
negative	am2	e	r1	Pantothenate	FALSE	FALSE	7968.3259909522885	1.207632305996366e-5
negative	am2	e	r1	Isoleucine	FALSE	FALSE	225942.400942741	3.4242492461108396e-4
negative	am2	e	r1	D-Xylose	FALSE	FALSE	17889.066676314713	2.711161022650239e-5
negative	am2	e	r1	Xanthine	FALSE	FALSE	40419.81096657396	6.125787220669093e-5
negative	am2	e	r1	Lactate	FALSE	FALSE	16288094.689078717	0.024685271877673953
negative	am2	e	r1	N-Acetyl-L-alanine	FALSE	FALSE	31049.971328645504	4.705749804828453e-5
negative	am2	e	r1	Leucine	FALSE	FALSE	412284.1259623801	6.248334095856227e-4
negative	am2	e	r1	Pterin	FALSE	FALSE	2682.997203334371	4.0661916986371554e-06
negative	am2	e	r1	Phenylalanine	FALSE	FALSE	207617.50331608712	3.146527948021997e-4
negative	am2	e	r1	Guanine	FALSE	FALSE	27796.4083685725	4.2126590672458464e-5
negative	am2	e	r1	Tryptophan	FALSE	FALSE	17761.386277664995	2.691810537438292e-5
negative	am2	e	r1	Acetylcholine	FALSE	FALSE	838.3440643253989	1.2705446247671087e-6
negative	am2	e	r1	2-Hydroxybutyric acid	FALSE	FALSE	982526.7382466868	0.0014890593481732453
negative	am2	e	r1	Nicotinate	FALSE	FALSE	33579.41905050148	5.0890979244599304e-5
negative	am2	e	r1	5-Methylcytosine	FALSE	FALSE	2903.147304561369	4.399838156766462e-6
negative	am2	e	r1	Creatinine	FALSE	FALSE	12107.177689034112	1.8348921628354052e-5
negative	am2	e	r1	Hypoxanthine	FALSE	FALSE	4194.147738952042	6.356401973803769e-6
negative	am2	e	r1	Acetyl-Methionine	FALSE	TRUE	727.7366355316201	1.1029145548550257e-6
negative	am2	e	r1	Uridine	FALSE	FALSE	5550.14512027372	8.411471315080593e-6
negative	am2	e	r1	Hydroxyphenyllactic acid	FALSE	FALSE	6062.873496704374	9.188532083279315e-6
negative	am2	e	r1	2-Hydroxy-3-methylbutyric acid	FALSE	FALSE	898496.2543316622	0.001361707722274009
negative	am2	e	r1	Pyruvate	FALSE	FALSE	822248.6224448298	0.0012461513260788614
negative	am2	e	r1	Adenine	FALSE	FALSE	60660.4403673398	9.19333716601759e-5
negative	am2	e	r1	Acetyl leucine	FALSE	FALSE	14797.38703842809	2.2426043628521336e-5
negative	am2	e	r1	Phenylethanolamine	FALSE	FALSE	667838.3191929709	0.0010121362132466671
negative	am2	e	r1	1-Methyladenosine	FALSE	FALSE	14855.382157046013	2.2513937596354254e-5
negative	am2	e	r1	3 4-Dimethoxyphenylacetic acid	FALSE	FALSE	184395.8214121331	2.7945938868574805e-4
negative	am2	e	r1	Hydroxy-methoxycinnamic acid	FALSE	FALSE	154562.93259319713	2.342464288246025e-4
negative	am2	e	r1	4-Hydroxy-3-methylbenzoic acid	FALSE	FALSE	239630.78250348082	3.6317022520285713e-4
negative	am2	e	r1	Phenylacetylglycine	FALSE	FALSE	11013.534170085391	1.6691460266675772e-5
negative	am2	e	r1	Leucic acid	FALSE	FALSE	592914.4797825171	8.985860785457468e-4
negative	am2	e	r1	Phenylpropanolamine	FALSE	FALSE	19251.198325244786	2.9175976300550862e-5
negative	am2	e	r1	Acetyl-Phenylalanine	FALSE	FALSE	8896.624708135543	1.348319763030426e-5
negative	am2	e	r1	2-hydroxy pyridine	FALSE	FALSE	25156.32474877879	3.8125436260082704e-5
negative	am2	e	r1	Phenyllactic acid	FALSE	FALSE	69689.89825891609	1.0561788339812778e-4
negative	am2	e	r1	Hydroxyoctanoic acid	FALSE	FALSE	339154.9979893631	5.140032332727637e-4
negative	am2	e	r1	Cresol	FALSE	FALSE	24785.3154805817	3.7563156581003805e-5
negative	am2	e	r1	Hydroxyphenyl pyruvate	FALSE	FALSE	51373.054049308004	7.785795887126784e-5
negative	am2	e	r1	3-Phenylbutyric acid	FALSE	FALSE	118840.35817862091	1.8010741020841527e-4
negative	am2	e	r1	Pyridoxic acid	FALSE	FALSE	18531.902868720088	2.808585469678874e-5
negative	am2	e	r1	2 3-dihydroxybenzoic acid	FALSE	FALSE	22120.028784156802	3.352380587798321e-5
negative	am2	e	r1	5- Methylthioadenosine	FALSE	FALSE	32239.62489890552	4.886046655888662e-5
negative	am2	e	r1	Methylphenyllactate	FALSE	FALSE	132031.88158955693	2.0009970200777458e-4
negative	am2	e	r1	Phenyl-pyruvate	FALSE	FALSE	123577.21333613001	1.8728630741157782e-4
negative	am2	e	r1	Undecanoic acid	FALSE	FALSE	215894.6721546451	3.2719718179512495e-4
negative	am2	e	r1	6-Phosphogluconate	FALSE	FALSE	55659.864282105125	8.435479463411158e-5
negative	am2	e	r1	CDP	FALSE	FALSE	82457.57006782839	1.2496781080610381e-4
negative	am2	e	r1	Carbamoyl phosphate	FALSE	FALSE	1626893.9825044598	0.002465624189992099
negative	am2	e	r1	Citrulline	FALSE	FALSE	14917.241864257305	2.2607688505833427e-5
negative	am2	e	r1	Cytosine	FALSE	FALSE	37305.741251916625	5.653837253409327e-5
negative	am2	e	r1	N-acetyl-glutamine	FALSE	FALSE	898.0567778737158	1.3610416777761514e-6
negative	am2	e	r1	Orotate	FALSE	FALSE	14418.753751917591	2.1852209438711776e-5
negative	am2	e	r1	Phosphoenolpyruvate	FALSE	FALSE	280484.8119843368	4.250861732793156e-4
negative	am2	e	r1	Thymine	FALSE	FALSE	28184.33068889001	4.2714502771893676e-5
negative	am2	e	r1	UDP	FALSE	FALSE	148114.15232124596	2.2447303928265486e-4
negative	am2	e	r1	Xylose-5-phosphate	FALSE	FALSE	31022.568678914682	4.701596821488864e-5
negative	am2	e	r1	Ribulose-5-phosphate	FALSE	FALSE	95017.43041664605	1.4400279146986847e-4
negative	am2	e	r1	Succinyl-CoA	FALSE	FALSE	3258.54924331475	4.938464291464839e-6
negative	am2	e	r1	Coenzyme A	FALSE	FALSE	36011.69997344011	5.4577200193810635e-5
negative	am2	e	r1	Acetyl CoA	FALSE	FALSE	157851.4082992011	2.3923024789094572e-4
negative	am2	e	r1	Propionyl CoA	FALSE	FALSE	1857.0969390146402	2.814506160349773e-6
negative	am2	e	r1	Butyryl CoA	FALSE	FALSE	15197.753158751202	2.3032814814436178e-5
negative	am2	e	r1	Itaconic acid	FALSE	FALSE	84165.01716691574	1.275555165299647e-4
negative	am2	e	r1	NegIS_Alanine-2H4-15N	TRUE	FALSE	72131086.13842203	0.10931760320332341
negative	am2	e	r1	NegIS_Glucose-2H7-13C6	TRUE	FALSE	11726436.843438186	0.017771893346785136
negative	am2	e	r1	NegIS_Glutamine-2H5-15N2	TRUE	FALSE	17146299.759272274	0.025985916666946385
negative	am2	e	r1	NegIS_Glycine-13C2_15N1	TRUE	FALSE	2374428.6451234412	0.0035985434624413045
negative	am2	e	r1	NegIS_Inosine-15N4	TRUE	FALSE	1296374.9291396008	0.0019647090830499955
negative	am2	e	r1	NegIS_Lysine-2H8	TRUE	FALSE	152623.15449005988	2.3130661598753642e-4
negative	am2	e	r1	NegIS_Malate-2H3	TRUE	FALSE	11274395.652781608	0.01708680648400142
negative	am2	e	r1	NegIS_Serine-13C3-15N1	TRUE	FALSE	576396.7111035874	8.735527263682634e-4
negative	am2	e	r1	NegIS_Thymine-2H4	TRUE	FALSE	2774257.578868878	0.004204500520186335
negative	am2	e	r2	GTP	FALSE	FALSE	25306.40114888708	1.6229255529907618e-5
negative	am2	e	r2	CTP	FALSE	FALSE	46101.190957737905	2.9565168270443646e-5
negative	am2	e	r2	UTP	FALSE	FALSE	97589.1332667277	6.258491562707185e-5
negative	am2	e	r2	Fructose-1 6-bisphosphate	FALSE	FALSE	106363.84245342699	6.821222694462098e-5
negative	am2	e	r2	Thiamine pyrophosphate	FALSE	FALSE	120881.1701150249	7.752233859761001e-5
negative	am2	e	r2	ATP	FALSE	FALSE	698834.9758358655	4.4817006295562705e-4
negative	am2	e	r2	Glutathione disulfide	FALSE	FALSE	1997792.2483994395	0.0012812047317272948
negative	am2	e	r2	Lysine	FALSE	FALSE	851395.1565663267	5.460084771258865e-4
negative	am2	e	r2	NADP+	FALSE	FALSE	213924.07833517718	1.3719171330903556e-4
negative	am2	e	r2	Pyridoxamine 5-phosphate	FALSE	FALSE	5393.964783096802	3.4592051342729365e-6
negative	am2	e	r2	Arginine	FALSE	FALSE	55403.43617967771	3.553079387720293e-5
negative	am2	e	r2	Ornithine	FALSE	FALSE	7452.901632698126	4.7796225280987026e-6
negative	am2	e	r2	NADPH	FALSE	FALSE	87884.88725628109	5.6361482776938955e-5
negative	am2	e	r2	Glucose-6-phosphate	FALSE	FALSE	3702881.6679800274	0.0023746961266083166
negative	am2	e	r2	ADP	FALSE	FALSE	2620984.3113777796	0.001680864216091809
negative	am2	e	r2	Isocitrate	FALSE	FALSE	1150349705.2704306	0.7377311062821261
negative	am2	e	r2	GMP	FALSE	FALSE	200793.115751012	1.2877069184974977e-4
negative	am2	e	r2	CMP	FALSE	FALSE	450715.46234509733	2.89048465115346e-4
negative	am2	e	r2	Aconitate	FALSE	FALSE	25895480.1390287	0.016607037949543713
negative	am2	e	r2	UDP-D-Glucose	FALSE	FALSE	7857459.421299205	0.005039069601951399
negative	am2	e	r2	UMP	FALSE	FALSE	556314.8559756003	3.5677044316152507e-4
negative	am2	e	r2	NAD+	FALSE	FALSE	1012515.93137033	6.493368883877884e-4
negative	am2	e	r2	ADP-D-Glucose	FALSE	FALSE	171126.77374136593	1.0974536136994139e-4
negative	am2	e	r2	Dihydroxyacetone phosphate	FALSE	FALSE	31787.683119443907	2.038576836801126e-5
negative	am2	e	r2	UDP-N-acetyl-glucosamine	FALSE	FALSE	3303309.0202206704	0.0021184460748883563
negative	am2	e	r2	5-Aminoimidazole-4-carboxamide ribonucleotide	FALSE	FALSE	60681.60923218922	3.891574058283314e-5
negative	am2	e	r2	Glycerol-3-phosphate	FALSE	FALSE	622953.6429063899	3.9950658311836815e-4
negative	am2	e	r2	AMP	FALSE	FALSE	1411561.7832786902	9.052491005063124e-4
negative	am2	e	r2	Deoxyribose phosphate	FALSE	FALSE	46117.4077214937	2.9575568247955757e-5
negative	am2	e	r2	N-carbomoyl-L-aspartate	FALSE	FALSE	3037862.8030647123	0.001948212683647704
negative	am2	e	r2	Tartaric acid	FALSE	FALSE	230980.27830617904	1.4813002990609012e-4
negative	am2	e	r2	Malate	FALSE	FALSE	16556975.30996249	0.010618158683522243
negative	am2	e	r2	Aminoadipic acid	FALSE	FALSE	415686.0010482268	2.665837110352534e-4
negative	am2	e	r2	Galacturonic acid	FALSE	FALSE	72873.883623848	4.673477164255698e-5
negative	am2	e	r2	NADH	FALSE	FALSE	73719.4162655508	4.727702042855933e-5
negative	am2	e	r2	Glutathione	FALSE	FALSE	9389336.645150986	0.00602147823287715
negative	am2	e	r2	Aspartate	FALSE	FALSE	442976.49969132466	2.840853887100701e-4
negative	am2	e	r2	Glutamate	FALSE	FALSE	41157955.31020786	0.026395020370063842
negative	am2	e	r2	Malonic acid	FALSE	FALSE	12013977.4666636	0.007704687406554071
negative	am2	e	r2	2-Hydroxyglutarate	FALSE	FALSE	16933289.013837874	0.010859492535130305
negative	am2	e	r2	N-Acetylaspartate	FALSE	FALSE	478081.12333307124	3.065983451755609e-4
negative	am2	e	r2	FAD	FALSE	FALSE	39915.28287175636	2.5598081744735456e-5
negative	am2	e	r2	Glucuronic acid	FALSE	FALSE	38516.17316753681	2.470081829069623e-5
negative	am2	e	r2	Succinate	FALSE	FALSE	18047816.719669603	0.011574250624464565
negative	am2	e	r2	N-acetyl-glutamate	FALSE	FALSE	445219.68858456216	2.8552396883594483e-4
negative	am2	e	r2	Inositol	FALSE	FALSE	39134.21354821992	2.5097173948179703e-5
negative	am2	e	r2	Glycerophosphocholine (+HAc)	FALSE	FALSE	88044.40368847856	5.646378230677415e-5
negative	am2	e	r2	Acetyllysine	FALSE	FALSE	9466.391170097415	6.070894092830285e-6
negative	am2	e	r2	N-acetyl-L-ornithine	FALSE	FALSE	22334.77676037	1.4323522223286495e-5
negative	am2	e	r2	Fumarate	FALSE	FALSE	1049970.43809872	6.733568490635646e-4
negative	am2	e	r2	a-ketoglutarate	FALSE	FALSE	384431.21020632726	2.465396919697724e-4
negative	am2	e	r2	Asparagine	FALSE	FALSE	176131.0113364081	1.1295463044714012e-4
negative	am2	e	r2	Serine	FALSE	FALSE	210110.904841946	1.347462858996846e-4
negative	am2	e	r2	S-adenosyl-L-homocysteine	FALSE	FALSE	2715.9512948794	1.7417675200853165e-6
negative	am2	e	r2	Glutamine	FALSE	FALSE	3760354.9553623386	0.0024115543373662836
negative	am2	e	r2	Histidine	FALSE	FALSE	28641.913566611012	1.8368353975077183e-5
negative	am2	e	r2	Methionine sulfoxide	FALSE	FALSE	8408.896678473902	5.392711990797871e-6
negative	am2	e	r2	Glycine	FALSE	FALSE	62390.748468892816	4.0011829167119006e-5
negative	am2	e	r2	Threonine	FALSE	FALSE	273391.23364364007	1.7532861209048042e-4
negative	am2	e	r2	Alanine	FALSE	FALSE	558487.1352188537	3.5816354819900783e-4
negative	am2	e	r2	Threonic acid	FALSE	FALSE	219918.38636672587	1.4103592474773948e-4
negative	am2	e	r2	Glucose	FALSE	FALSE	6165904.943401894	0.003954258304483989
negative	am2	e	r2	Thiamine	FALSE	FALSE	42147350.16037295	0.027029529471094594
negative	am2	e	r2	Proline	FALSE	FALSE	156428.1278572921	1.0031896847461064e-4
negative	am2	e	r2	Sorbitol	FALSE	FALSE	5581320.553820769	0.0035793583184492556
negative	am2	e	r2	Pipecolic acid	FALSE	FALSE	12259.1735888624	7.861934203469e-6
negative	am2	e	r2	Pyridoxamine	FALSE	FALSE	16551.82497345679	1.0614855719709876e-5
negative	am2	e	r2	Valine	FALSE	FALSE	3373612.728470798	0.0021635325666095064
negative	am2	e	r2	Tyrosine	FALSE	FALSE	151150.5873258559	9.693442741125643e-5
negative	am2	e	r2	Glycerate	FALSE	FALSE	315010.3802571682	2.0201939919030248e-4
negative	am2	e	r2	Acetyl glycine	FALSE	FALSE	57362.32703611639	3.678705074586246e-5
negative	am2	e	r2	Methionine	FALSE	FALSE	26813.954572894698	1.7196065057633877e-5
negative	am2	e	r2	Pantothenate	FALSE	FALSE	38350.762177227196	2.4594738520072355e-5
negative	am2	e	r2	Isoleucine	FALSE	FALSE	737557.6738636483	4.730033277649133e-4
negative	am2	e	r2	D-Xylose	FALSE	FALSE	52149.16907547582	3.3443798887834885e-5
negative	am2	e	r2	Xanthine	FALSE	FALSE	148175.59846353097	9.502653643295256e-5
negative	am2	e	r2	Lactate	FALSE	FALSE	16093668.425510993	0.010321035209809372
negative	am2	e	r2	N-Acetyl-L-alanine	FALSE	FALSE	102173.48453049899	6.552490727823047e-5
negative	am2	e	r2	Leucine	FALSE	FALSE	1872740.8129990685	0.0012010079590785846
negative	am2	e	r2	Pterin	FALSE	FALSE	55802.85305229971	3.5786944028723946e-5
negative	am2	e	r2	Phenylalanine	FALSE	FALSE	772578.4817338829	4.954625323134365e-4
negative	am2	e	r2	Guanine	FALSE	FALSE	55620.59277715827	3.5670058638311494e-5
negative	am2	e	r2	Tryptophan	FALSE	FALSE	89879.77798246835	5.764082673260686e-5
negative	am2	e	r2	Acetylcholine	FALSE	FALSE	1689.1946359682004	1.0832979065489454e-6
negative	am2	e	r2	2-Hydroxybutyric acid	FALSE	FALSE	2675436.8126802924	0.0017157851656445261
negative	am2	e	r2	Nicotinate	FALSE	FALSE	119769.14423191699	7.680918495293924e-5
negative	am2	e	r2	5-Methylcytosine	FALSE	FALSE	6352.934023719078	4.074201978739888e-6
negative	am2	e	r2	Creatinine	FALSE	FALSE	41494.486129984674	2.6610841048623162e-5
negative	am2	e	r2	Hypoxanthine	FALSE	FALSE	9419.89414206719	6.041075070170993e-6
negative	am2	e	r2	Acetyl-Methionine	FALSE	TRUE	1185.666966837114	7.603804296375135e-7
negative	am2	e	r2	Uridine	FALSE	FALSE	12935.930766447305	8.295945547164447e-6
negative	am2	e	r2	Hydroxyphenyllactic acid	FALSE	FALSE	12435.122111139406	7.974771801804026e-6
negative	am2	e	r2	2-Hydroxy-3-methylbutyric acid	FALSE	FALSE	3203063.850208642	0.002054157815558531
negative	am2	e	r2	Pyruvate	FALSE	FALSE	1846284.7711499007	0.0011840414271345923
negative	am2	e	r2	Adenine	FALSE	FALSE	210407.0189107589	1.349361868998502e-4
negative	am2	e	r2	Acetyl leucine	FALSE	FALSE	63624.4068091171	4.080298695847418e-5
negative	am2	e	r2	Phenylethanolamine	FALSE	FALSE	2337302.1347810095	0.0014989359163631124
negative	am2	e	r2	1-Methyladenosine	FALSE	FALSE	136128.3059772181	8.730048376139336e-5
negative	am2	e	r2	3 4-Dimethoxyphenylacetic acid	FALSE	FALSE	747369.7445307015	4.7929590967714305e-4
negative	am2	e	r2	Hydroxy-methoxycinnamic acid	FALSE	FALSE	404864.79010712187	2.5964395707841917e-4
negative	am2	e	r2	4-Hydroxy-3-methylbenzoic acid	FALSE	FALSE	806300.1047720042	5.170885562569065e-4
negative	am2	e	r2	Phenylacetylglycine	FALSE	FALSE	55811.950589477296	3.579277837295484e-5
negative	am2	e	r2	Leucic acid	FALSE	FALSE	1168771.8520002193	7.495454185949751e-4
negative	am2	e	r2	Phenylpropanolamine	FALSE	FALSE	48974.7745794822	3.1408027024221695e-5
negative	am2	e	r2	Acetyl-Phenylalanine	FALSE	FALSE	32107.64457860991	2.0590962945066144e-5
negative	am2	e	r2	2-hydroxy pyridine	FALSE	FALSE	88205.33319967566	5.6566988058716306e-5
negative	am2	e	r2	Phenyllactic acid	FALSE	FALSE	181748.22914352588	1.1655701004361115e-4
negative	am2	e	r2	Hydroxyoctanoic acid	FALSE	FALSE	1119694.528259061	7.18071625737855e-4
negative	am2	e	r2	Cresol	FALSE	FALSE	62378.01730000233	4.000366453747046e-5
negative	am2	e	r2	Hydroxyphenyl pyruvate	FALSE	FALSE	164477.8198540999	1.054813188058426e-4
negative	am2	e	r2	3-Phenylbutyric acid	FALSE	FALSE	275958.85201726004	1.7697525218140448e-4
negative	am2	e	r2	Pyridoxic acid	FALSE	FALSE	54631.22215120458	3.503556507251685e-5
negative	am2	e	r2	2 3-dihydroxybenzoic acid	FALSE	FALSE	79393.31872739058	5.091575247754605e-5
negative	am2	e	r2	5- Methylthioadenosine	FALSE	FALSE	84573.12802364361	5.423761749385155e-5
negative	am2	e	r2	Methylphenyllactate	FALSE	FALSE	429328.269445982	2.7533263817555086e-4
negative	am2	e	r2	Phenyl-pyruvate	FALSE	FALSE	216140.41872742504	1.3861307521488e-4
negative	am2	e	r2	Undecanoic acid	FALSE	FALSE	236701.9832118862	1.5179941815434886e-4
negative	am2	e	r2	6-Phosphogluconate	FALSE	FALSE	71737.82193985394	4.600620359138279e-5
negative	am2	e	r2	CDP	FALSE	FALSE	184242.730772346	1.1815675961352076e-4
negative	am2	e	r2	Carbamoyl phosphate	FALSE	FALSE	2991204.95318645	0.0019182905242819623
negative	am2	e	r2	Citrulline	FALSE	FALSE	165431.48668399997	1.0609291515973688e-4
negative	am2	e	r2	Cytosine	FALSE	FALSE	105219.06005332204	6.747806620844451e-5
negative	am2	e	r2	N-acetyl-glutamine	FALSE	FALSE	97460.50270409007	6.250242352328673e-5
negative	am2	e	r2	Orotate	FALSE	FALSE	68084.54169988706	4.366331737109572e-5
negative	am2	e	r2	Phosphoenolpyruvate	FALSE	FALSE	760632.9174776366	4.8780171900288485e-4
negative	am2	e	r2	Thymine	FALSE	FALSE	64383.16294235708	4.128958507642813e-5
negative	am2	e	r2	UDP	FALSE	FALSE	860269.7906251315	5.516998712924212e-4
negative	am2	e	r2	Xylose-5-phosphate	FALSE	FALSE	90837.01115460542	5.825471021848529e-5
negative	am2	e	r2	Ribulose-5-phosphate	FALSE	FALSE	269029.7854986141	1.7253157050366508e-4
negative	am2	e	r2	Succinyl-CoA	FALSE	FALSE	54433.31034390718	3.4908642193435066e-5
negative	am2	e	r2	Coenzyme A	FALSE	FALSE	384141.78471144504	2.463540804209125e-4
negative	am2	e	r2	Acetyl CoA	FALSE	FALSE	981160.7177142015	6.292284671379128e-4
negative	am2	e	r2	Propionyl CoA	FALSE	FALSE	14334.111875895813	9.19261348381918e-6
negative	am2	e	r2	Butyryl CoA	FALSE	FALSE	163927.9975443531	1.0512871209940394e-4
negative	am2	e	r2	Itaconic acid	FALSE	FALSE	255342.54081498994	1.6375379960830905e-4
negative	am2	e	r2	NegIS_Alanine-2H4-15N	TRUE	FALSE	79852243.72115399	0.05121006579965883
negative	am2	e	r2	NegIS_Glucose-2H7-13C6	TRUE	FALSE	11905563.35424508	0.007635160320377864
negative	am2	e	r2	NegIS_Glutamine-2H5-15N2	TRUE	FALSE	16038447.989790712	0.010285621776010362
negative	am2	e	r2	NegIS_Glycine-13C2_15N1	TRUE	FALSE	2107210.319802322	0.001351375667133697
negative	am2	e	r2	NegIS_Inosine-15N4	TRUE	FALSE	1205550.0994931501	7.731316872624664e-4
negative	am2	e	r2	NegIS_Lysine-2H8	TRUE	FALSE	189698.22505244784	1.216554242475324e-4
negative	am2	e	r2	NegIS_Malate-2H3	TRUE	FALSE	13791515.110099696	0.008844640593086992
negative	am2	e	r2	NegIS_Serine-13C3-15N1	TRUE	FALSE	587205.6914988173	3.765810539350243e-4
negative	am2	e	r2	NegIS_Thymine-2H4	TRUE	FALSE	2139379.3996726694	0.001372006029163694
negative	am3	e	r1	GTP	FALSE	FALSE	25415.28493176781	1.3932311930483962e-5
negative	am3	e	r1	CTP	FALSE	FALSE	33734.00937607902	1.8492523005553113e-5
negative	am3	e	r1	UTP	FALSE	FALSE	305274.4483186722	1.6734728136240132e-4
negative	am3	e	r1	Fructose-1 6-bisphosphate	FALSE	FALSE	215210.80311808587	1.1797562167415703e-4
negative	am3	e	r1	Thiamine pyrophosphate	FALSE	FALSE	658292.3526113011	3.6086687293317876e-4
negative	am3	e	r1	ATP	FALSE	FALSE	703980.3725782353	3.8591242120755064e-4
negative	am3	e	r1	Glutathione disulfide	FALSE	FALSE	3398914.3259795425	0.0018632383914510687
negative	am3	e	r1	Lysine	FALSE	FALSE	889121.8073284443	4.874044260039665e-4
negative	am3	e	r1	NADP+	FALSE	FALSE	682000.2412132141	3.7386321352514087e-4
negative	am3	e	r1	Pyridoxamine 5-phosphate	FALSE	FALSE	34020.97609755219	1.8649834241211743e-5
negative	am3	e	r1	Arginine	FALSE	FALSE	276327.2637740918	1.5147883032330743e-4
negative	am3	e	r1	Ornithine	FALSE	FALSE	48908.45141186329	2.6810944789183658e-5
negative	am3	e	r1	NADPH	FALSE	FALSE	85789.61249837466	4.702869336037633e-5
negative	am3	e	r1	Glucose-6-phosphate	FALSE	FALSE	2680179.190186112	0.0014692376106549313
negative	am3	e	r1	ADP	FALSE	FALSE	3112354.822647161	0.0017061503872130774
negative	am3	e	r1	Isocitrate	FALSE	FALSE	404060549.84833896	0.22150047242843765
negative	am3	e	r1	GMP	FALSE	FALSE	943627.1547093004	5.172835126885419e-4
negative	am3	e	r1	CMP	FALSE	FALSE	1759044.5585887786	9.642841918032617e-4
negative	am3	e	r1	Aconitate	FALSE	FALSE	12369272.51060921	0.006780666179176339
negative	am3	e	r1	UDP-D-Glucose	FALSE	FALSE	36128709.85112784	0.01980526508529094
negative	am3	e	r1	UMP	FALSE	FALSE	4676430.141922669	0.0025635551060435085
negative	am3	e	r1	NAD+	FALSE	FALSE	6430352.853311695	0.0035250315711957093
negative	am3	e	r1	ADP-D-Glucose	FALSE	FALSE	69518.72829443005	3.8109216961715606e-5
negative	am3	e	r1	Dihydroxyacetone phosphate	FALSE	FALSE	108675.85793649197	5.957462039670514e-5
negative	am3	e	r1	UDP-N-acetyl-glucosamine	FALSE	FALSE	27305825.91149583	0.014968680663616299
negative	am3	e	r1	5-Aminoimidazole-4-carboxamide ribonucleotide	FALSE	FALSE	392719.90547866875	2.1528368614116537e-4
negative	am3	e	r1	Glycerol-3-phosphate	FALSE	FALSE	1100681.8265736194	6.033787378425373e-4
negative	am3	e	r1	AMP	FALSE	FALSE	6342790.699346361	0.00347703119482278
negative	am3	e	r1	Deoxyribose phosphate	FALSE	FALSE	151295.86518131493	8.29383260174966e-5
negative	am3	e	r1	N-carbomoyl-L-aspartate	FALSE	FALSE	19755722.290039025	0.01082981702136257
negative	am3	e	r1	Tartaric acid	FALSE	FALSE	167138.63323915694	9.16231149945529e-5
negative	am3	e	r1	Malate	FALSE	FALSE	302718114.46762294	0.16594593407446454
negative	am3	e	r1	Aminoadipic acid	FALSE	FALSE	107681.78669806704	5.902968412658104e-5
negative	am3	e	r1	Galacturonic acid	FALSE	FALSE	63468.12100554509	3.4792356720175054e-5
negative	am3	e	r1	NADH	FALSE	FALSE	124639.11178380993	6.832545803725967e-5
negative	am3	e	r1	Glutathione	FALSE	FALSE	39943533.30027402	0.02189649917516712
negative	am3	e	r1	Aspartate	FALSE	FALSE	10349316.23857701	0.005673353751106204
negative	am3	e	r1	Glutamate	FALSE	FALSE	303288852.66415024	0.16625880495535406
negative	am3	e	r1	Malonic acid	FALSE	FALSE	7083526.844979255	0.0038830926285957374
negative	am3	e	r1	2-Hydroxyglutarate	FALSE	FALSE	45734378.38319223	0.025070961324732872
negative	am3	e	r1	N-Acetylaspartate	FALSE	FALSE	10986006.196151895	0.006022378486251005
negative	am3	e	r1	FAD	FALSE	FALSE	175045.50096672808	9.595755184502876e-5
negative	am3	e	r1	Glucuronic acid	FALSE	FALSE	58287.730094660576	3.1952537206600684e-5
negative	am3	e	r1	Succinate	FALSE	FALSE	168860992.1501938	0.09256728861563318
negative	am3	e	r1	N-acetyl-glutamate	FALSE	FALSE	70164564.54722491	0.03846325557092694
negative	am3	e	r1	Inositol	FALSE	FALSE	29719.727161327173	1.6291948345734553e-5
negative	am3	e	r1	Glycerophosphocholine (+HAc)	FALSE	FALSE	121395.8292489649	6.654753486718846e-5
negative	am3	e	r1	Acetyllysine	FALSE	FALSE	968932.4126196697	5.311555093092813e-4
negative	am3	e	r1	N-acetyl-L-ornithine	FALSE	FALSE	267146.1743519051	1.4644588255054074e-4
negative	am3	e	r1	Fumarate	FALSE	FALSE	23551214.107733764	0.012910453775020422
negative	am3	e	r1	a-ketoglutarate	FALSE	FALSE	4954803.291120048	0.0027161554628013134
negative	am3	e	r1	Asparagine	FALSE	FALSE	1431498.1099412488	7.847277041805116e-4
negative	am3	e	r1	Serine	FALSE	FALSE	3144584.136579442	0.0017238180567361826
negative	am3	e	r1	S-adenosyl-L-homocysteine	FALSE	FALSE	54796.32769119844	3.003859811481131e-5
negative	am3	e	r1	Glutamine	FALSE	FALSE	15418008.287637806	0.008451941474858586
negative	am3	e	r1	Histidine	FALSE	FALSE	14283.327652476895	7.82992505470107e-6
negative	am3	e	r1	Methionine sulfoxide	FALSE	FALSE	27446.69799811132	1.504590481665233e-5
negative	am3	e	r1	Glycine	FALSE	FALSE	870193.4292561747	4.770281477781276e-4
negative	am3	e	r1	Threonine	FALSE	FALSE	5698897.765736645	0.0031240578866356355
negative	am3	e	r1	Alanine	FALSE	FALSE	7130554.192716229	0.0039088723780533515
negative	am3	e	r1	Threonic acid	FALSE	FALSE	392278.50835722976	2.1504171827035e-4
negative	am3	e	r1	Glucose	FALSE	FALSE	434287.52237866784	2.3807048575456486e-4
negative	am3	e	r1	Thiamine	FALSE	FALSE	21930489.813534997	0.012021994862176746
negative	am3	e	r1	Proline	FALSE	FALSE	1023342.6057184199	5.609824337165744e-4
negative	am3	e	r1	Sorbitol	FALSE	FALSE	4459539.119647048	0.0024446584111853524
negative	am3	e	r1	Pipecolic acid	FALSE	FALSE	21655.782604147094	1.1871404123531865e-5
negative	am3	e	r1	Pyridoxamine	FALSE	FALSE	17437.373751576004	9.558930030004266e-6
negative	am3	e	r1	Valine	FALSE	FALSE	4005634.2002426307	0.002195833936429261
negative	am3	e	r1	Tyrosine	FALSE	FALSE	1088181.7139954905	5.965263469261178e-4
negative	am3	e	r1	Glycerate	FALSE	FALSE	216133.4891140838	1.1848142552977558e-4
negative	am3	e	r1	Acetyl glycine	FALSE	FALSE	269213.8269031532	1.475793414271651e-4
negative	am3	e	r1	Methionine	FALSE	FALSE	898959.4359070795	4.927972795714852e-4
negative	am3	e	r1	Pantothenate	FALSE	FALSE	146604.71219934511	8.036670005170903e-5
negative	am3	e	r1	Isoleucine	FALSE	FALSE	2738442.1454025186	0.0015011765666117919
negative	am3	e	r1	D-Xylose	FALSE	FALSE	69260.99924954056	3.796793342086268e-5
negative	am3	e	r1	Xanthine	FALSE	FALSE	22588.985960759685	1.2382973452532376e-5
negative	am3	e	r1	Lactate	FALSE	FALSE	26481856.623931516	0.014516991958716693
negative	am3	e	r1	N-Acetyl-L-alanine	FALSE	FALSE	283577.2993825238	1.5545320078088723e-4
negative	am3	e	r1	Leucine	FALSE	FALSE	1899878.3061534285	0.0010414873278954786
negative	am3	e	r1	Pterin	FALSE	FALSE	495191.0186890024	2.714569502593182e-4
negative	am3	e	r1	Phenylalanine	FALSE	FALSE	1629101.0740831597	8.930509491177402e-4
negative	am3	e	r1	Guanine	FALSE	FALSE	18307.873326844507	1.0036126002843239e-5
negative	am3	e	r1	Tryptophan	FALSE	FALSE	525253.4829027884	2.8793678237412374e-4
negative	am3	e	r1	Acetylcholine	FALSE	FALSE	12346.834498088701	6.768365967300883e-6
negative	am3	e	r1	2-Hydroxybutyric acid	FALSE	FALSE	1789903.0414963013	9.812003904893414e-4
negative	am3	e	r1	Nicotinate	FALSE	FALSE	70504.86024392294	3.864980102212793e-5
negative	am3	e	r1	5-Methylcytosine	FALSE	FALSE	2728.6935677165898	1.4958325295268821e-6
negative	am3	e	r1	Creatinine	FALSE	FALSE	78883.43696605046	4.3242822298087034e-5
negative	am3	e	r1	Hypoxanthine	FALSE	FALSE	8646.032128365405	4.7396366752042625e-6
negative	am3	e	r1	Acetyl-Methionine	FALSE	FALSE	1487.8989161688694	8.156458555057321e-7
negative	am3	e	r1	Uridine	FALSE	FALSE	26547.917757717114	1.4553205769612511e-5
negative	am3	e	r1	Hydroxyphenyllactic acid	FALSE	FALSE	21100.0030826333	1.1566733383892561e-5
negative	am3	e	r1	2-Hydroxy-3-methylbutyric acid	FALSE	FALSE	2210932.791184799	0.0012120031464065743
negative	am3	e	r1	Pyruvate	FALSE	FALSE	3581069.7384994896	0.001963093499661235
negative	am3	e	r1	Adenine	FALSE	FALSE	299543.5219184462	1.6420566581597115e-4
negative	am3	e	r1	Acetyl leucine	FALSE	FALSE	90442.01628171936	4.957907754493851e-5
negative	am3	e	r1	Phenylethanolamine	FALSE	FALSE	1963082.4482433414	0.0010761349749810565
negative	am3	e	r1	1-Methyladenosine	FALSE	FALSE	61717.629863812566	3.383276139462031e-5
negative	am3	e	r1	3 4-Dimethoxyphenylacetic acid	FALSE	FALSE	501863.15609273413	2.75114524817361e-4
negative	am3	e	r1	Hydroxy-methoxycinnamic acid	FALSE	FALSE	322795.296906399	1.7695197115700085e-4
negative	am3	e	r1	4-Hydroxy-3-methylbenzoic acid	FALSE	FALSE	576184.0702291059	3.158562344415711e-4
negative	am3	e	r1	Phenylacetylglycine	FALSE	FALSE	84470.30384558001	4.6305466383670424e-5
negative	am3	e	r1	Leucic acid	FALSE	FALSE	1287842.1355869907	7.059774619245453e-4
negative	am3	e	r1	Phenylpropanolamine	FALSE	FALSE	20088.998600655585	1.1012514541025112e-5
negative	am3	e	r1	Acetyl-Phenylalanine	FALSE	FALSE	87908.45539720144	4.819021408608917e-5
negative	am3	e	r1	2-hydroxy pyridine	FALSE	FALSE	43168.05255128837	2.3664136569419916e-5
negative	am3	e	r1	Phenyllactic acid	FALSE	FALSE	182828.62125352686	1.0022415203933222e-4
negative	am3	e	r1	Hydroxyoctanoic acid	FALSE	FALSE	610063.9847908356	3.3442874067628013e-4
negative	am3	e	r1	Cresol	FALSE	FALSE	43056.11150697319	2.3602772018465237e-5
negative	am3	e	r1	Hydroxyphenyl pyruvate	FALSE	FALSE	196165.56222828684	1.0753528084853752e-4
negative	am3	e	r1	3-Phenylbutyric acid	FALSE	FALSE	147311.6507041059	8.075423408055977e-5
negative	am3	e	r1	Pyridoxic acid	FALSE	FALSE	40685.2523357359	2.230309941571433e-5
negative	am3	e	r1	2 3-dihydroxybenzoic acid	FALSE	FALSE	43225.18027607633	2.3695453207567455e-5
negative	am3	e	r1	5- Methylthioadenosine	FALSE	FALSE	664809.7373561064	3.6443961419810577e-4
negative	am3	e	r1	Methylphenyllactate	FALSE	FALSE	236145.79984760107	1.294519008298824e-4
negative	am3	e	r1	Phenyl-pyruvate	FALSE	FALSE	1673408.8686883708	9.173398767079248e-4
negative	am3	e	r1	Undecanoic acid	FALSE	FALSE	188931.77628379408	1.0356981823469723e-4
negative	am3	e	r1	6-Phosphogluconate	FALSE	FALSE	213056.98047392807	1.1679492553000961e-4
negative	am3	e	r1	CDP	FALSE	FALSE	207419.80213489308	1.1370470138977054e-4
negative	am3	e	r1	Carbamoyl phosphate	FALSE	FALSE	2340276.5517652193	0.0012829076286308035
negative	am3	e	r1	Citrulline	FALSE	FALSE	1360510.0663306902	7.458130286389099e-4
negative	am3	e	r1	Cytosine	FALSE	FALSE	65920.531224595	3.613673449304047e-5
negative	am3	e	r1	N-acetyl-glutamine	FALSE	FALSE	1599.2247388325295	8.766731503573098e-7
negative	am3	e	r1	Orotate	FALSE	FALSE	458464.5516688783	2.5132400286161186e-4
negative	am3	e	r1	Phosphoenolpyruvate	FALSE	FALSE	31900892.989999395	0.01748763365002125
negative	am3	e	r1	Thymine	FALSE	FALSE	135190.77832975503	7.4109737461993e-5
negative	am3	e	r1	UDP	FALSE	FALSE	4015812.7006779276	0.0022014136512910005
negative	am3	e	r1	Xylose-5-phosphate	FALSE	FALSE	167087.345237347	9.159499961274917e-5
negative	am3	e	r1	Ribulose-5-phosphate	FALSE	FALSE	743337.4101953626	4.0748741146297046e-4
negative	am3	e	r1	Succinyl-CoA	FALSE	FALSE	1042388.9696318707	5.714233901684151e-4
negative	am3	e	r1	Coenzyme A	FALSE	FALSE	2704028.0622004694	0.0014823112364272277
negative	am3	e	r1	Acetyl CoA	FALSE	FALSE	4159415.4437111793	0.0022801347128641324
negative	am3	e	r1	Propionyl CoA	FALSE	FALSE	196755.5793229811	1.0785872015797933e-4
negative	am3	e	r1	Butyryl CoA	FALSE	FALSE	5934.808902468581	3.253381148351898e-6
negative	am3	e	r1	Itaconic acid	FALSE	FALSE	3683955.306029089	0.002019493961974193
negative	am3	e	r1	NegIS_Alanine-2H4-15N	TRUE	FALSE	79298774.07956262	0.043470504428635384
negative	am3	e	r1	NegIS_Glucose-2H7-13C6	TRUE	FALSE	11983572.479483414	0.006569230692237331
negative	am3	e	r1	NegIS_Glutamine-2H5-15N2	TRUE	FALSE	18660959.774641525	0.010229683169026558
negative	am3	e	r1	NegIS_Glycine-13C2_15N1	TRUE	FALSE	2565943.75972749	0.001406615308566425
negative	am3	e	r1	NegIS_Inosine-15N4	TRUE	FALSE	1234042.7208723195	6.764853578818567e-4
negative	am3	e	r1	NegIS_Lysine-2H8	TRUE	FALSE	158154.44404173893	8.669810523460112e-5
negative	am3	e	r1	NegIS_Malate-2H3	TRUE	FALSE	9466058.138105884	0.0051891637290809615
negative	am3	e	r1	NegIS_Serine-13C3-15N1	TRUE	FALSE	662529.3841256101	3.631895557154149e-4
negative	am3	e	r1	NegIS_Thymine-2H4	TRUE	FALSE	2136443.36490844	0.0011711690607297378
negative	am3	e	r2	GTP	FALSE	FALSE	26907.538649460486	1.558188613021634e-5
negative	am3	e	r2	CTP	FALSE	FALSE	45952.58326617676	2.661068071557738e-5
negative	am3	e	r2	UTP	FALSE	FALSE	341564.97504499496	1.9779685598734654e-4
negative	am3	e	r2	Fructose-1 6-bisphosphate	FALSE	FALSE	341166.72663055686	1.975662343193391e-4
negative	am3	e	r2	Thiamine pyrophosphate	FALSE	FALSE	682261.0925568008	3.95090565279564e-4
negative	am3	e	r2	ATP	FALSE	FALSE	850314.3840390606	4.924085431815351e-4
negative	am3	e	r2	Glutathione disulfide	FALSE	FALSE	3121728.391118861	0.0018077616445550605
negative	am3	e	r2	Lysine	FALSE	FALSE	743536.2180946408	4.305743767564817e-4
negative	am3	e	r2	NADP+	FALSE	FALSE	637811.9118253172	3.693504899139835e-4
negative	am3	e	r2	Pyridoxamine 5-phosphate	FALSE	FALSE	41805.66942970619	2.4209244447715746e-5
negative	am3	e	r2	Arginine	FALSE	FALSE	236646.38925756895	1.370395538059452e-4
negative	am3	e	r2	Ornithine	FALSE	FALSE	44604.16631995626	2.5829825967553697e-5
negative	am3	e	r2	NADPH	FALSE	FALSE	164617.97454033198	9.532862026849625e-5
negative	am3	e	r2	Glucose-6-phosphate	FALSE	FALSE	4020075.380361141	0.002327985388322741
negative	am3	e	r2	ADP	FALSE	FALSE	3779981.7521932996	0.0021889495729908613
negative	am3	e	r2	Isocitrate	FALSE	FALSE	475592177.0149463	0.27541066625271476
negative	am3	e	r2	GMP	FALSE	FALSE	671222.6902098994	3.886983370393798e-4
negative	am3	e	r2	CMP	FALSE	FALSE	1446325.7761606404	8.375527708025325e-4
negative	am3	e	r2	Aconitate	FALSE	FALSE	12381360.054511491	0.007169921597807516
negative	am3	e	r2	UDP-D-Glucose	FALSE	FALSE	24690269.460866228	0.014297887750921782
negative	am3	e	r2	UMP	FALSE	FALSE	3361318.951021879	0.001946506138093434
negative	am3	e	r2	NAD+	FALSE	FALSE	5408855.94928711	0.0031322143059794444
negative	am3	e	r2	ADP-D-Glucose	FALSE	FALSE	65026.66563567185	3.765629077273505e-5
negative	am3	e	r2	Dihydroxyacetone phosphate	FALSE	FALSE	121737.27336009199	7.049683570139576e-5
negative	am3	e	r2	UDP-N-acetyl-glucosamine	FALSE	FALSE	15097282.323338708	0.008742684981433949
negative	am3	e	r2	5-Aminoimidazole-4-carboxamide ribonucleotide	FALSE	FALSE	314470.0533871692	1.8210645823378468e-4
negative	am3	e	r2	Glycerol-3-phosphate	FALSE	FALSE	755117.2022715526	4.3728080870001056e-4
negative	am3	e	r2	AMP	FALSE	FALSE	4101896.0607385393	0.002375366924826193
negative	am3	e	r2	Deoxyribose phosphate	FALSE	FALSE	151490.16787893002	8.772643891693059e-5
negative	am3	e	r2	N-carbomoyl-L-aspartate	FALSE	FALSE	24959099.26539446	0.01445356439816693
negative	am3	e	r2	Tartaric acid	FALSE	FALSE	159177.87985949512	9.217831592595858e-5
negative	am3	e	r2	Malate	FALSE	FALSE	238595072.01909477	0.13816801647544394
negative	am3	e	r2	Aminoadipic acid	FALSE	FALSE	126248.65376135094	7.310933090648641e-5
negative	am3	e	r2	Galacturonic acid	FALSE	FALSE	68969.88311951944	3.993976852298342e-5
negative	am3	e	r2	NADH	FALSE	FALSE	281828.37423113326	1.6320398876846232e-4
negative	am3	e	r2	Glutathione	FALSE	FALSE	35974514.78753364	0.020832481198363804
negative	am3	e	r2	Aspartate	FALSE	FALSE	5138328.234252383	0.0029755544157659907
negative	am3	e	r2	Glutamate	FALSE	FALSE	205473826.39560816	0.1189878348720834
negative	am3	e	r2	Malonic acid	FALSE	FALSE	6066504.614371027	0.003513052061023674
negative	am3	e	r2	2-Hydroxyglutarate	FALSE	FALSE	140811637.90635288	0.08154260916429228
negative	am3	e	r2	N-Acetylaspartate	FALSE	FALSE	3201266.526003769	0.0018538213818254288
negative	am3	e	r2	FAD	FALSE	FALSE	197514.76794648697	1.1437882384087826e-4
negative	am3	e	r2	Glucuronic acid	FALSE	FALSE	59379.038761805285	3.4385806615823766e-5
negative	am3	e	r2	Succinate	FALSE	FALSE	156429656.28723523	0.09058684718103908
negative	am3	e	r2	N-acetyl-glutamate	FALSE	FALSE	49536201.73444163	0.028685918277589133
negative	am3	e	r2	Inositol	FALSE	FALSE	12659.52550096721	7.331004421788545e-6
negative	am3	e	r2	Glycerophosphocholine (+HAc)	FALSE	FALSE	26509.15796466388	1.535118786576907e-5
negative	am3	e	r2	Acetyllysine	FALSE	FALSE	858120.4868088154	4.969289791107993e-4
negative	am3	e	r2	N-acetyl-L-ornithine	FALSE	FALSE	397032.16203404695	2.299173484220626e-4
negative	am3	e	r2	Fumarate	FALSE	FALSE	19814974.503116302	0.011474653271078328
negative	am3	e	r2	a-ketoglutarate	FALSE	FALSE	3463416.4569597924	0.002005629781189476
negative	am3	e	r2	Asparagine	FALSE	FALSE	990350.9440966462	5.735023125266643e-4
negative	am3	e	r2	Serine	FALSE	FALSE	2364871.8865366215	0.0013694736233075106
negative	am3	e	r2	S-adenosyl-L-homocysteine	FALSE	FALSE	46128.308846915774	2.6712441639343488e-5
negative	am3	e	r2	Glutamine	FALSE	FALSE	17432522.56318552	0.010094999214929316
negative	am3	e	r2	Histidine	FALSE	FALSE	19355.218608210405	1.1208413237181246e-5
negative	am3	e	r2	Methionine sulfoxide	FALSE	FALSE	12917.540880956292	7.480418544098651e-6
negative	am3	e	r2	Glycine	FALSE	FALSE	675594.6664709575	3.9123010470313007e-4
negative	am3	e	r2	Threonine	FALSE	FALSE	4154600.948825549	0.0024058877976334886
negative	am3	e	r2	Alanine	FALSE	FALSE	4916099.481651481	0.0028468639709431347
negative	am3	e	r2	Threonic acid	FALSE	FALSE	423291.6023792328	2.451239273155245e-4
negative	am3	e	r2	Glucose	FALSE	FALSE	1320503.491492019	7.646903459671998e-4
negative	am3	e	r2	Thiamine	FALSE	FALSE	26561905.620167006	0.015381733504758688
negative	am3	e	r2	Proline	FALSE	FALSE	659272.5041893525	3.8177810400606964e-4
negative	am3	e	r2	Sorbitol	FALSE	FALSE	3016375.05029795	0.0017467525800882065
negative	am3	e	r2	Pipecolic acid	FALSE	FALSE	19592.58217617171	1.1345868101991374e-5
negative	am3	e	r2	Pyridoxamine	FALSE	FALSE	23182.576075732813	1.342479761241146e-5
negative	am3	e	r2	Valine	FALSE	FALSE	3001116.7826026576	0.0017379166700902783
negative	am3	e	r2	Tyrosine	FALSE	FALSE	844550.8706947961	4.89070950330317e-4
negative	am3	e	r2	Glycerate	FALSE	FALSE	204045.54637032104	1.1816073221486832e-4
negative	am3	e	r2	Acetyl glycine	FALSE	FALSE	139255.1596856679	8.06412682161353e-5
negative	am3	e	r2	Methionine	FALSE	FALSE	517371.43469939905	2.9960461592329015e-4
negative	am3	e	r2	Pantothenate	FALSE	FALSE	180232.36694977712	1.0437075852150093e-4
negative	am3	e	r2	Isoleucine	FALSE	FALSE	2057075.6751934104	0.001191231920157227
negative	am3	e	r2	D-Xylose	FALSE	FALSE	62965.17918491211	3.646250461662499e-5
negative	am3	e	r2	Xanthine	FALSE	FALSE	22255.916395728902	1.288817827299919e-5
negative	am3	e	r2	Lactate	FALSE	FALSE	8997799.622199005	0.0052105356406658785
negative	am3	e	r2	N-Acetyl-L-alanine	FALSE	FALSE	135992.93173532694	7.875214468405627e-5
negative	am3	e	r2	Leucine	FALSE	FALSE	1685404.6790435603	9.760009688852435e-4
negative	am3	e	r2	Pterin	FALSE	FALSE	619522.175047731	3.5875908653321787e-4
negative	am3	e	r2	Phenylalanine	FALSE	FALSE	1191900.0020780598	6.902173533199525e-4
negative	am3	e	r2	Guanine	FALSE	FALSE	11828.91173753341	6.850004310681192e-6
negative	am3	e	r2	Tryptophan	FALSE	FALSE	414128.3528195733	2.398175812731958e-4
negative	am3	e	r2	Acetylcholine	FALSE	FALSE	12038.4544400173	6.971348390942774e-6
negative	am3	e	r2	2-Hydroxybutyric acid	FALSE	FALSE	1805905.1804583208	0.0010457816023404117
negative	am3	e	r2	Nicotinate	FALSE	FALSE	101051.10631105305	5.851768355270152e-5
negative	am3	e	r2	5-Methylcytosine	FALSE	FALSE	3924.840721991963	2.2728359515165492e-6
negative	am3	e	r2	Creatinine	FALSE	FALSE	18399.0009120164	1.0654677146641744e-5
negative	am3	e	r2	Hypoxanthine	FALSE	FALSE	4039.33394460913	2.339137829987993e-6
negative	am3	e	r2	Acetyl-Methionine	FALSE	FALSE	8758.7227121895	5.072088596636201e-6
negative	am3	e	r2	Uridine	FALSE	FALSE	25216.8941947855	1.4602850859743707e-5
negative	am3	e	r2	Hydroxyphenyllactic acid	FALSE	FALSE	19539.603488441804	1.1315188674553212e-5
negative	am3	e	r2	2-Hydroxy-3-methylbutyric acid	FALSE	FALSE	2504820.76016432	0.0014505166143193456
negative	am3	e	r2	Pyruvate	FALSE	FALSE	2843165.251784222	0.001646448520611078
negative	am3	e	r2	Adenine	FALSE	FALSE	149085.49275510796	8.633391563757406e-5
negative	am3	e	r2	Acetyl leucine	FALSE	FALSE	82043.56475008166	4.7510606611297615e-5
negative	am3	e	r2	Phenylethanolamine	FALSE	FALSE	1286192.560407341	7.448212294289663e-4
negative	am3	e	r2	1-Methyladenosine	FALSE	FALSE	74462.97412413408	4.312076250581795e-5
negative	am3	e	r2	3 4-Dimethoxyphenylacetic acid	FALSE	FALSE	507074.78688885784	2.93641930305815e-4
negative	am3	e	r2	Hydroxy-methoxycinnamic acid	FALSE	FALSE	324883.0902954703	1.8813654361203764e-4
negative	am3	e	r2	4-Hydroxy-3-methylbenzoic acid	FALSE	FALSE	486752.7160476026	2.818736226243178e-4
negative	am3	e	r2	Phenylacetylglycine	FALSE	FALSE	47564.15650033362	2.7543926634212904e-5
negative	am3	e	r2	Leucic acid	FALSE	FALSE	872143.0759937399	5.050493200597354e-4
negative	am3	e	r2	Phenylpropanolamine	FALSE	FALSE	36121.5712088939	2.0917640099079487e-5
negative	am3	e	r2	Acetyl-Phenylalanine	FALSE	FALSE	47098.30911450159	2.7274159078931915e-5
negative	am3	e	r2	2-hydroxy pyridine	FALSE	FALSE	80218.08389159884	4.645348892988014e-5
negative	am3	e	r2	Phenyllactic acid	FALSE	FALSE	171953.6269157681	9.957662308636784e-5
negative	am3	e	r2	Hydroxyoctanoic acid	FALSE	FALSE	697682.2203359244	4.0402078592085774e-4
negative	am3	e	r2	Cresol	FALSE	FALSE	33884.17399889283	1.962198578418735e-5
negative	am3	e	r2	Hydroxyphenyl pyruvate	FALSE	FALSE	152502.635749729	8.831274892019091e-5
negative	am3	e	r2	3-Phenylbutyric acid	FALSE	FALSE	196235.13158686587	1.1363779924165872e-4
negative	am3	e	r2	Pyridoxic acid	FALSE	FALSE	33775.47421799313	1.9559038829788282e-5
negative	am3	e	r2	2 3-dihydroxybenzoic acid	FALSE	FALSE	50819.77093273183	2.9429220344291247e-5
negative	am3	e	r2	5- Methylthioadenosine	FALSE	FALSE	594853.7531229366	3.4447385047161374e-4
negative	am3	e	r2	Methylphenyllactate	FALSE	FALSE	231134.12786894586	1.3384745844573895e-4
negative	am3	e	r2	Phenyl-pyruvate	FALSE	FALSE	1243233.8990775992	7.19944298920126e-4
negative	am3	e	r2	Undecanoic acid	FALSE	FALSE	261805.3931252999	1.5160888095711204e-4
negative	am3	e	r2	6-Phosphogluconate	FALSE	FALSE	1026584.9803826492	5.944850800254652e-4
negative	am3	e	r2	CDP	FALSE	FALSE	200103.51931970287	1.1587794383257991e-4
negative	am3	e	r2	Carbamoyl phosphate	FALSE	FALSE	1849056.833059641	0.0010707702921616527
negative	am3	e	r2	Citrulline	FALSE	FALSE	1699746.7540532402	9.843063208753756e-4
negative	am3	e	r2	Cytosine	FALSE	FALSE	69965.59674486493	4.0516376310509524e-5
negative	am3	e	r2	N-acetyl-glutamine	FALSE	FALSE	392262.21953531477	2.2715512249604262e-4
negative	am3	e	r2	Orotate	FALSE	FALSE	313268.15672645415	1.81410451915573e-4
negative	am3	e	r2	Phosphoenolpyruvate	FALSE	FALSE	23233440.20132592	0.013454252518095325
negative	am3	e	r2	Thymine	FALSE	FALSE	122443.92334321591	7.090604962892745e-5
negative	am3	e	r2	UDP	FALSE	FALSE	2858124.368017918	0.0016551111949938493
negative	am3	e	r2	Xylose-5-phosphate	FALSE	FALSE	199000.2434385442	1.1523904782003908e-4
negative	am3	e	r2	Ribulose-5-phosphate	FALSE	FALSE	719397.9269500779	4.16596134120003e-4
negative	am3	e	r2	Succinyl-CoA	FALSE	FALSE	1326638.7374527804	7.682432054534156e-4
negative	am3	e	r2	Coenzyme A	FALSE	FALSE	2950622.132211971	0.0017086757237955291
negative	am3	e	r2	Acetyl CoA	FALSE	FALSE	4311516.361833033	0.0024967559416659607
negative	am3	e	r2	Propionyl CoA	FALSE	FALSE	93002.04052814453	5.3856550175999445e-5
negative	am3	e	r2	Butyryl CoA	FALSE	FALSE	6431.8842855366775	3.7246397690102314e-6
negative	am3	e	r2	Itaconic acid	FALSE	FALSE	13694818.826691305	0.00793053241737982
negative	am3	e	r2	NegIS_Alanine-2H4-15N	TRUE	FALSE	77506275.23093191	0.04488310769553807
negative	am3	e	r2	NegIS_Glucose-2H7-13C6	TRUE	FALSE	11186907.569592584	0.006478226127239696
negative	am3	e	r2	NegIS_Glutamine-2H5-15N2	TRUE	FALSE	18773714.020603385	0.010871669754756752
negative	am3	e	r2	NegIS_Glycine-13C2_15N1	TRUE	FALSE	2381865.3208893714	0.0013793143509376153
negative	am3	e	r2	NegIS_Inosine-15N4	TRUE	FALSE	1223436.4477516196	7.084797931454181e-4
negative	am3	e	r2	NegIS_Lysine-2H8	TRUE	FALSE	195308.260274288	1.1310105734794256e-4
negative	am3	e	r2	NegIS_Malate-2H3	TRUE	FALSE	8983111.439750366	0.005202029861324403
negative	am3	e	r2	NegIS_Serine-13C3-15N1	TRUE	FALSE	650656.8010071714	3.7678883658680013e-4
negative	am3	e	r2	NegIS_Thymine-2H4	TRUE	FALSE	2198932.328296859	0.001273379687155449
negative	am4	e	r1	GTP	FALSE	FALSE	2817.5439001539094	3.858359855008043e-6
negative	am4	e	r1	CTP	FALSE	FALSE	1851.5121048630697	2.535470689942002e-6
negative	am4	e	r1	UTP	FALSE	FALSE	6643.538775440899	9.097697929373965e-6
negative	am4	e	r1	Fructose-1 6-bisphosphate	FALSE	FALSE	43390.21299049803	5.9418792336701837e-05
negative	am4	e	r1	Thiamine pyrophosphate	FALSE	FALSE	12774.587387757396	1.7493589057662166e-5
negative	am4	e	r1	ATP	FALSE	FALSE	49758.09131979521	6.813899936027077e-5
negative	am4	e	r1	Glutathione disulfide	FALSE	FALSE	105710.75565957002	1.4476088051624297e-4
negative	am4	e	r1	Lysine	FALSE	FALSE	124725.45808230405	1.7079971685124862e-4
negative	am4	e	r1	NADP+	FALSE	FALSE	28287.668398623577	3.8737286093418757e-5
negative	am4	e	r1	Pyridoxamine 5-phosphate	FALSE	TRUE	847.2795936802113	1.1602692579322998e-6
negative	am4	e	r1	Arginine	FALSE	FALSE	19031.231773849908	2.6061471717819516e-5
negative	am4	e	r1	Ornithine	FALSE	FALSE	21774.48591430279	2.981809877411128e-5
negative	am4	e	r1	NADPH	FALSE	FALSE	4280.780824803098	5.8621244132544865e-6
negative	am4	e	r1	Glucose-6-phosphate	FALSE	FALSE	191517.8605539619	2.622655940296334e-4
negative	am4	e	r1	ADP	FALSE	FALSE	311447.48676295526	4.26497872776248e-4
negative	am4	e	r1	Isocitrate	FALSE	FALSE	491731250.49715877	0.6733794338634802
negative	am4	e	r1	GMP	FALSE	FALSE	17962.026000638416	2.4597295549392575e-5
negative	am4	e	r1	CMP	FALSE	FALSE	54439.6145818703	7.454990263446292e-5
negative	am4	e	r1	Aconitate	FALSE	FALSE	4362120.244378918	0.00597351105433002
negative	am4	e	r1	UDP-D-Glucose	FALSE	FALSE	910365.5487213907	0.0012466595059537884
negative	am4	e	r1	UMP	FALSE	FALSE	69671.90534797077	9.540908399043801e-5
negative	am4	e	r1	NAD+	FALSE	FALSE	196640.28960621488	2.692802760774482e-4
negative	am4	e	r1	ADP-D-Glucose	FALSE	FALSE	1265.0773797540405	1.7324038057597336e-6
negative	am4	e	r1	Dihydroxyacetone phosphate	FALSE	FALSE	12628.50453090861	1.7293542403432768e-5
negative	am4	e	r1	UDP-N-acetyl-glucosamine	FALSE	FALSE	443162.0666740398	6.068685308591325e-4
negative	am4	e	r1	5-Aminoimidazole-4-carboxamide ribonucleotide	FALSE	FALSE	8448.296659372618	1.1569143136311477e-5
negative	am4	e	r1	Glycerol-3-phosphate	FALSE	FALSE	149543.66465165798	2.0478590315175716e-4
negative	am4	e	r1	AMP	FALSE	FALSE	257286.0453454889	3.5232890197756523e-4
negative	am4	e	r1	Deoxyribose phosphate	FALSE	FALSE	49427.76118880567	6.768664349236753e-5
negative	am4	e	r1	N-carbomoyl-L-aspartate	FALSE	FALSE	23775528.036465906	0.03255833667844793
negative	am4	e	r1	Tartaric acid	FALSE	FALSE	86315.70957624413	1.1820119951540824e-4
negative	am4	e	r1	Malate	FALSE	FALSE	7990033.043560585	0.010941594462388992
negative	am4	e	r1	Aminoadipic acid	FALSE	FALSE	39699.79251134572	5.436511057363045e-5
negative	am4	e	r1	Galacturonic acid	FALSE	FALSE	39554.986083261996	5.416681186785525e-5
negative	am4	e	r1	NADH	FALSE	FALSE	1301.17863860161	1.7818410648722204e-6
negative	am4	e	r1	Glutathione	FALSE	FALSE	49186.95768415993	6.735688587076681e-5
negative	am4	e	r1	Aspartate	FALSE	FALSE	223494.42413950307	3.0605447314268805e-4
negative	am4	e	r1	Glutamate	FALSE	FALSE	2950939.5367486575	0.004041032561205205
negative	am4	e	r1	Malonic acid	FALSE	FALSE	4636093.235639369	0.00634869115029163
negative	am4	e	r1	2-Hydroxyglutarate	FALSE	FALSE	5732894.35513182	0.007850656535159772
negative	am4	e	r1	N-Acetylaspartate	FALSE	FALSE	1092169.94692983	0.0014956234321140945
negative	am4	e	r1	FAD	FALSE	FALSE	3463.0154626134104	4.742272103547281e-6
negative	am4	e	r1	Glucuronic acid	FALSE	FALSE	10280.22882864991	1.4077800956568049e-5
negative	am4	e	r1	Succinate	FALSE	FALSE	6943010.638944531	0.009507796318891069
negative	am4	e	r1	N-acetyl-glutamate	FALSE	FALSE	441431.26137994725	6.044983567286789e-4
negative	am4	e	r1	Inositol	FALSE	FALSE	72357.40710769207	9.908662462421344e-5
negative	am4	e	r1	Glycerophosphocholine (+HAc)	FALSE	FALSE	183804.97953179403	2.517035330442623e-4
negative	am4	e	r1	Acetyllysine	FALSE	FALSE	1248.25902589909	1.709372661031974e-6
negative	am4	e	r1	N-acetyl-L-ornithine	FALSE	FALSE	166120.13124168108	2.2748580615072496e-4
negative	am4	e	r1	Fumarate	FALSE	FALSE	650274.4748999276	8.904893828107742e-4
negative	am4	e	r1	a-ketoglutarate	FALSE	FALSE	85184.40032550444	1.1665197850897962e-4
negative	am4	e	r1	Asparagine	FALSE	FALSE	43266.0782861262	5.9248801601176685e-5
negative	am4	e	r1	Serine	FALSE	FALSE	198662.329382957	2.720492682835271e-4
negative	am4	e	r1	S-adenosyl-L-homocysteine	FALSE	FALSE	1645.4531517610997	2.25329244513446e-6
negative	am4	e	r1	Glutamine	FALSE	FALSE	295634.3727416002	4.048433089132579e-4
negative	am4	e	r1	Histidine	FALSE	FALSE	20631.134882759896	2.8252387687925132e-5
negative	am4	e	r1	Methionine sulfoxide	FALSE	FALSE	4867.986223883533	6.666246662541239e-6
negative	am4	e	r1	Glycine	FALSE	FALSE	49375.483804412564	6.761505455944757e-5
negative	am4	e	r1	Threonine	FALSE	FALSE	97407.24134471947	1.3339000310554712e-4
negative	am4	e	r1	Alanine	FALSE	FALSE	382864.230093581	5.242963473367501e-4
negative	am4	e	r1	Threonic acid	FALSE	FALSE	248536.5114975468	3.40347243006044e-4
negative	am4	e	r1	Glucose	FALSE	FALSE	2081803.33556408	0.002850832746749222
negative	am4	e	r1	Thiamine	FALSE	FALSE	15689006.611686613	0.02148461050497943
negative	am4	e	r1	Proline	FALSE	FALSE	55897.737763605124	7.654666440550576e-5
negative	am4	e	r1	Sorbitol	FALSE	FALSE	2056587.04377708	0.0028163014203987026
negative	am4	e	r1	Pipecolic acid	FALSE	FALSE	5269.8686164048695	7.2165865843625836e-06
negative	am4	e	r1	Pyridoxamine	FALSE	FALSE	5601.41898118246	7.670613447014572e-6
negative	am4	e	r1	Valine	FALSE	FALSE	189032.2282720099	2.588617557396704e-4
negative	am4	e	r1	Tyrosine	FALSE	FALSE	78009.34537327041	1.0682641945250345e-4
negative	am4	e	r1	Glycerate	FALSE	FALSE	155107.46510961198	2.124050015896102e-4
negative	am4	e	r1	Acetyl glycine	FALSE	FALSE	26909.221666535694	3.6849633683437e-5
negative	am4	e	r1	Methionine	FALSE	FALSE	15665.184758116608	2.1451988729864812e-5
negative	am4	e	r1	Pantothenate	FALSE	FALSE	9907.447406402654	1.356731206082696e-5
negative	am4	e	r1	Isoleucine	FALSE	FALSE	192586.255513933	2.637286598660238e-4
negative	am4	e	r1	D-Xylose	FALSE	FALSE	19181.922618819397	2.6267828575902813e-5
negative	am4	e	r1	Xanthine	FALSE	FALSE	36441.16620822957	4.990273009049768e-5
negative	am4	e	r1	Lactate	FALSE	FALSE	13674927.25484059	0.01872651934095866
negative	am4	e	r1	N-Acetyl-L-alanine	FALSE	FALSE	44223.054662253126	6.0559290226265195e-5
negative	am4	e	r1	Leucine	FALSE	FALSE	290042.16973665904	3.9718531587395095e-4
negative	am4	e	r1	Pterin	FALSE	FALSE	1538.8111409691996	2.1072562988034923e-6
negative	am4	e	r1	Phenylalanine	FALSE	FALSE	170651.16435513302	2.3369062740149593e-4
negative	am4	e	r1	Guanine	FALSE	FALSE	3278.133988017089	4.489094412339642e-6
negative	am4	e	r1	Tryptophan	FALSE	FALSE	37326.558211409174	5.1115190688121984e-5
negative	am4	e	r1	Acetylcholine	FALSE	FALSE	991.0465879457281	1.357144557415279e-6
negative	am4	e	r1	2-Hydroxybutyric acid	FALSE	FALSE	1040362.9947735192	0.0014246787116434347
negative	am4	e	r1	Nicotinate	FALSE	FALSE	50549.412931341394	6.922263945483089e-5
negative	am4	e	r1	5-Methylcytosine	FALSE	FALSE	1770.8080899209592	2.4249541754083334e-6
negative	am4	e	r1	Creatinine	FALSE	FALSE	66902.10309477404	9.161610180497452e-5
negative	am4	e	r1	Hypoxanthine	FALSE	FALSE	3924.1755281012784	5.373787191320741e-6
negative	am4	e	r1	Acetyl-Methionine	FALSE	FALSE	1140.8222575741902	1.5622481694370251e-6
negative	am4	e	r1	Uridine	FALSE	FALSE	12195.795179531391	1.6700987877432573e-5
negative	am4	e	r1	Hydroxyphenyllactic acid	FALSE	FALSE	6293.419984664987	8.618243363736159e-6
negative	am4	e	r1	2-Hydroxy-3-methylbutyric acid	FALSE	FALSE	1504993.8065472688	0.002060946658151635
negative	am4	e	r1	Pyruvate	FALSE	FALSE	836746.7731024304	0.0011458455564683785
negative	am4	e	r1	Adenine	FALSE	FALSE	167871.2710896229	2.298838265291952e-4
negative	am4	e	r1	Acetyl leucine	FALSE	FALSE	17189.722374907185	2.3539698787462525e-5
negative	am4	e	r1	Phenylethanolamine	FALSE	FALSE	918127.4879585503	0.001257288747524091
negative	am4	e	r1	1-Methyladenosine	FALSE	FALSE	22770.69441228608	3.118231207904918e-5
negative	am4	e	r1	3 4-Dimethoxyphenylacetic acid	FALSE	FALSE	255494.70200537215	3.4987582671947785e-4
negative	am4	e	r1	Hydroxy-methoxycinnamic acid	FALSE	FALSE	175179.411803293	2.3989163394715036e-4
negative	am4	e	r1	4-Hydroxy-3-methylbenzoic acid	FALSE	FALSE	300298.3310594098	4.112301586577762e-4
negative	am4	e	r1	Phenylacetylglycine	FALSE	FALSE	16586.132126080713	2.271313903631928e-5
negative	am4	e	r1	Leucic acid	FALSE	FALSE	709311.9143394391	9.71335571671731e-4
negative	am4	e	r1	Phenylpropanolamine	FALSE	FALSE	21007.938259795385	2.8768384270305188e-5
negative	am4	e	r1	Acetyl-Phenylalanine	FALSE	FALSE	18927.11853702659	2.5918898488237504e-5
negative	am4	e	r1	2-hydroxy pyridine	FALSE	FALSE	40186.569458528604	5.5031705557740984e-5
negative	am4	e	r1	Phenyllactic acid	FALSE	FALSE	76407.258688108	1.0463251328126833e-4
negative	am4	e	r1	Hydroxyoctanoic acid	FALSE	FALSE	399883.2562116782	5.476022937469595e-4
negative	am4	e	r1	Cresol	FALSE	FALSE	21316.8982437865	2.9191475743332504e-5
negative	am4	e	r1	Hydroxyphenyl pyruvate	FALSE	FALSE	49795.87842795523	6.819074523054932e-5
negative	am4	e	r1	3-Phenylbutyric acid	FALSE	FALSE	122429.32329092307	1.6765537744973383e-4
negative	am4	e	r1	Pyridoxic acid	FALSE	FALSE	12113.935153632206	1.6588888315242227e-5
negative	am4	e	r1	2 3-dihydroxybenzoic acid	FALSE	FALSE	19449.218041231816	2.6633864372969597e-5
negative	am4	e	r1	5- Methylthioadenosine	FALSE	FALSE	23607.983515084485	3.232890030473631e-5
negative	am4	e	r1	Methylphenyllactate	FALSE	FALSE	146394.297439695	2.00473142658956e-4
negative	am4	e	r1	Phenyl-pyruvate	FALSE	FALSE	85259.49287059245	1.1675481064634655e-4
negative	am4	e	r1	Undecanoic acid	FALSE	FALSE	311310.0659604301	4.263096879860564e-4
negative	am4	e	r1	6-Phosphogluconate	FALSE	FALSE	21907.459285784	3.0000193228178223e-5
negative	am4	e	r1	CDP	FALSE	FALSE	37266.2369174398	5.103258638192435e-5
negative	am4	e	r1	Carbamoyl phosphate	FALSE	FALSE	1870417.7007238714	0.0025613601151610156
negative	am4	e	r1	Citrulline	FALSE	FALSE	49006.57180773008	6.71098644760019e-5
negative	am4	e	r1	Cytosine	FALSE	FALSE	43340.66507642034	5.93509411551936e-5
negative	am4	e	r1	N-acetyl-glutamine	FALSE	FALSE	711.4685491141431	9.742888789959496e-7
negative	am4	e	r1	Orotate	FALSE	FALSE	12923.777024053506	1.7697890152469144e-5
negative	am4	e	r1	Phosphoenolpyruvate	FALSE	FALSE	500132.686967929	6.848844064040854e-4
negative	am4	e	r1	Thymine	FALSE	FALSE	20517.155413532015	2.8096303586328717e-5
negative	am4	e	r1	UDP	FALSE	FALSE	82505.09606896977	1.1298292476958594e-4
negative	am4	e	r1	Xylose-5-phosphate	FALSE	FALSE	13807.603595728691	1.890820703972497e-5
negative	am4	e	r1	Ribulose-5-phosphate	FALSE	FALSE	50959.58809690907	6.978433554491174e-5
negative	am4	e	r1	Succinyl-CoA	FALSE	FALSE	4258.880839449273	5.832134454869154e-6
negative	am4	e	r1	Coenzyme A	FALSE	FALSE	22992.752878148385	3.148640014316097e-5
negative	am4	e	r1	Acetyl CoA	FALSE	FALSE	146326.85543934393	2.0038078721892834e-4
negative	am4	e	r1	Propionyl CoA	FALSE	FALSE	2450.9037861161996	3.356280899943175e-6
negative	am4	e	r1	Butyryl CoA	FALSE	FALSE	5358.592457361814	7.338085492014632e-6
negative	am4	e	r1	Itaconic acid	FALSE	FALSE	102566.83936038396	1.4045558453287877e-4
negative	am4	e	r1	NegIS_Alanine-2H4-15N	TRUE	FALSE	81540183.35650828	0.11166156808259876
negative	am4	e	r1	NegIS_Glucose-2H7-13C6	TRUE	FALSE	10591809.104143688	0.014504480670950448
negative	am4	e	r1	NegIS_Glutamine-2H5-15N2	TRUE	FALSE	17538924.384771302	0.024017897908361487
negative	am4	e	r1	NegIS_Glycine-13C2_15N1	TRUE	FALSE	2415709.47405944	0.003308085618671068
negative	am4	e	r1	NegIS_Inosine-15N4	TRUE	FALSE	1216286.9900231406	0.0016655899821889216
negative	am4	e	r1	NegIS_Lysine-2H8	TRUE	FALSE	145002.50841447702	1.9856721924060272e-4
negative	am4	e	r1	NegIS_Malate-2H3	TRUE	FALSE	12754173.358154716	0.017465633975118952
negative	am4	e	r1	NegIS_Serine-13C3-15N1	TRUE	FALSE	659301.7484081655	9.028513799752054e-4
negative	am4	e	r1	NegIS_Thymine-2H4	TRUE	FALSE	2277148.7162855584	0.00311833976759665
negative	am4	e	r2	GTP	FALSE	FALSE	12314.2971472567	1.910815216243338e-5
negative	am4	e	r2	CTP	FALSE	FALSE	12744.628130531195	1.97758987508329e-5
negative	am4	e	r2	UTP	FALSE	FALSE	26307.413849484285	4.082133643721908e-5
negative	am4	e	r2	Fructose-1 6-bisphosphate	FALSE	FALSE	68842.01862479596	1.068224805136134e-4
negative	am4	e	r2	Thiamine pyrophosphate	FALSE	FALSE	16310.67358094411	2.530934806343319e-5
negative	am4	e	r2	ATP	FALSE	FALSE	168896.39922921002	2.620773282929751e-4
negative	am4	e	r2	Glutathione disulfide	FALSE	FALSE	288578.1240933328	4.477880174552554e-4
negative	am4	e	r2	Lysine	FALSE	FALSE	130745.71196413298	2.0287872940867734e-4
negative	am4	e	r2	NADP+	FALSE	FALSE	49645.19241882242	7.703467599719828e-5
negative	am4	e	r2	Pyridoxamine 5-phosphate	FALSE	TRUE	1410.5868155743908	2.1888141229661964e-6
negative	am4	e	r2	Arginine	FALSE	FALSE	20672.753076195208	3.2078007106101894e-5
negative	am4	e	r2	Ornithine	FALSE	FALSE	4193.666850390763	6.5073323582800666e-6
negative	am4	e	r2	NADPH	FALSE	FALSE	12785.803323796608	1.9839790489746185e-5
negative	am4	e	r2	Glucose-6-phosphate	FALSE	FALSE	314728.083688705	4.883650313939821e-4
negative	am4	e	r2	ADP	FALSE	FALSE	687780.1886600486	0.0010672317179020714
negative	am4	e	r2	Isocitrate	FALSE	FALSE	408039162.91802853	0.6331562670636521
negative	am4	e	r2	GMP	FALSE	FALSE	73023.98864840544	1.1331166285137004e-4
negative	am4	e	r2	CMP	FALSE	FALSE	98201.59536560543	1.5237987230620992e-4
negative	am4	e	r2	Aconitate	FALSE	FALSE	4429750.265713347	0.006873664091960527
negative	am4	e	r2	UDP-D-Glucose	FALSE	FALSE	1839913.432300961	0.0028550022311215673
negative	am4	e	r2	UMP	FALSE	FALSE	160871.13548470408	2.4962448921170917e-4
negative	am4	e	r2	NAD+	FALSE	FALSE	315787.8575475078	4.900094874201455e-4
negative	am4	e	r2	ADP-D-Glucose	FALSE	FALSE	2827.2451211300504	4.387049405177411e-6
negative	am4	e	r2	Dihydroxyacetone phosphate	FALSE	FALSE	18913.995359071592	2.9348934575710777e-5
negative	am4	e	r2	UDP-N-acetyl-glucosamine	FALSE	FALSE	714277.4199535708	0.0011083475949501258
negative	am4	e	r2	5-Aminoimidazole-4-carboxamide ribonucleotide	FALSE	FALSE	8131.509921102746	1.2617701767687331e-5
negative	am4	e	r2	Glycerol-3-phosphate	FALSE	FALSE	68979.25942320039	1.0703543769886289e-4
negative	am4	e	r2	AMP	FALSE	FALSE	455815.9762981639	7.072917706158939e-4
negative	am4	e	r2	Deoxyribose phosphate	FALSE	FALSE	106282.21227523308	1.649186031512663e-4
negative	am4	e	r2	N-carbomoyl-L-aspartate	FALSE	FALSE	35180447.45196396	0.054589663950441125
negative	am4	e	r2	Tartaric acid	FALSE	FALSE	85177.94671810884	1.321710161213587e-4
negative	am4	e	r2	Malate	FALSE	FALSE	9144386.199666405	0.01418938660045306
negative	am4	e	r2	Aminoadipic acid	FALSE	FALSE	36696.69686797688	5.6942435221989495e-5
negative	am4	e	r2	Galacturonic acid	FALSE	FALSE	40537.23376101253	6.290181418288397e-5
negative	am4	e	r2	NADH	FALSE	FALSE	12683.24932737071	1.968065697646985e-5
negative	am4	e	r2	Glutathione	FALSE	FALSE	237728.70988161018	3.68884744900666e-4
negative	am4	e	r2	Aspartate	FALSE	FALSE	222977.27844716996	3.459948801286615e-4
negative	am4	e	r2	Glutamate	FALSE	FALSE	3470371.708662762	0.005384991922507297
negative	am4	e	r2	Malonic acid	FALSE	FALSE	3946987.124123139	0.006124558279618237
negative	am4	e	r2	2-Hydroxyglutarate	FALSE	FALSE	4583573.383701172	0.007112352139639
negative	am4	e	r2	N-Acetylaspartate	FALSE	FALSE	1827148.3347235585	0.002835194569834812
negative	am4	e	r2	FAD	FALSE	FALSE	4051.1290041678485	6.286155719291805e-6
negative	am4	e	r2	Glucuronic acid	FALSE	FALSE	10589.576408401592	1.6431894969541966e-5
negative	am4	e	r2	Succinate	FALSE	FALSE	5748447.366376166	0.008919892516880279
negative	am4	e	r2	N-acetyl-glutamate	FALSE	FALSE	1051379.4361165592	0.0016314303614351324
negative	am4	e	r2	Inositol	FALSE	FALSE	15168.076736548008	2.3536375225279714e-5
negative	am4	e	r2	Glycerophosphocholine (+HAc)	FALSE	FALSE	22530.372609573795	3.496048397662422e-5
negative	am4	e	r2	Acetyllysine	FALSE	FALSE	4426.5991130101875	6.868774433653682e-6
negative	am4	e	r2	N-acetyl-L-ornithine	FALSE	FALSE	235302.14999843595	3.651194406429822e-4
negative	am4	e	r2	Fumarate	FALSE	FALSE	787236.5640723613	0.0012215586382432729
negative	am4	e	r2	a-ketoglutarate	FALSE	FALSE	102115.37526741702	1.5845290278450642e-4
negative	am4	e	r2	Asparagine	FALSE	FALSE	35737.7441423727	5.545442381717237e-5
negative	am4	e	r2	Serine	FALSE	FALSE	55050.11097315982	8.542151325853933e-5
negative	am4	e	r2	S-adenosyl-L-homocysteine	FALSE	FALSE	1204.1036431357602	1.86841322385209e-6
negative	am4	e	r2	Glutamine	FALSE	FALSE	165091.27772837313	2.561729035608875e-4
negative	am4	e	r2	Histidine	FALSE	FALSE	14957.711079132903	2.3209949856168523e-5
negative	am4	e	r2	Methionine sulfoxide	FALSE	FALSE	3326.112814189542	5.161144724943708e-6
negative	am4	e	r2	Glycine	FALSE	FALSE	21001.396494657212	3.258796462718975e-5
negative	am4	e	r2	Threonine	FALSE	FALSE	61551.32150964359	9.550947188789735e-5
negative	am4	e	r2	Alanine	FALSE	FALSE	191130.38330629416	2.9657790480510596e-4
negative	am4	e	r2	Threonic acid	FALSE	FALSE	188653.09779047893	2.9273388934730656e-4
negative	am4	e	r2	Glucose	FALSE	FALSE	1612157.4881313099	0.0025015922731637242
negative	am4	e	r2	Thiamine	FALSE	FALSE	13397046.212536503	0.02078825892335461
negative	am4	e	r2	Proline	FALSE	FALSE	37686.79190259563	5.8478770292560644e-5
negative	am4	e	r2	Sorbitol	FALSE	FALSE	820665.6224142414	0.001273430663565141
negative	am4	e	r2	Pipecolic acid	FALSE	FALSE	5278.399847149057	8.190517594904579e-6
negative	am4	e	r2	Pyridoxamine	FALSE	FALSE	3993.649143267853	6.196963951769994e-6
negative	am4	e	r2	Valine	FALSE	FALSE	159799.33004145	0.00024796136371998875
negative	am4	e	r2	Tyrosine	FALSE	FALSE	38897.79746119748	6.035789325074521e-5
negative	am4	e	r2	Glycerate	FALSE	FALSE	133816.2274523609	2.0764326257403451e-4
negative	am4	e	r2	Acetyl glycine	FALSE	FALSE	13019.060498271103	2.0201736732356614e-5
negative	am4	e	r2	Methionine	FALSE	FALSE	6963.156427834723	1.0804762217674165e-5
negative	am4	e	r2	Pantothenate	FALSE	FALSE	12871.560361898504	1.9972860084661367e-5
negative	am4	e	r2	Isoleucine	FALSE	FALSE	145495.85359696698	2.2576659278953005e-4
negative	am4	e	r2	D-Xylose	FALSE	FALSE	12619.891515638707	1.958234436530116e-5
negative	am4	e	r2	Xanthine	FALSE	FALSE	12813.095919619705	1.988214053763436e-5
negative	am4	e	r2	Lactate	FALSE	FALSE	3533166.5859913877	0.005482431025743816
negative	am4	e	r2	N-Acetyl-L-alanine	FALSE	FALSE	26131.80391474422	4.054884168464641e-5
negative	am4	e	r2	Leucine	FALSE	FALSE	190869.54800739704	2.961731654585513e-4
negative	am4	e	r2	Pterin	FALSE	FALSE	6488.775273668403	1.0068662774205714e-5
negative	am4	e	r2	Phenylalanine	FALSE	FALSE	109506.0369299691	1.6992102686340022e-4
negative	am4	e	r2	Guanine	FALSE	FALSE	4682.442584316554	7.265767938116605e-6
negative	am4	e	r2	Tryptophan	FALSE	FALSE	14541.055931211298	2.256342412509821e-5
negative	am4	e	r2	Acetylcholine	FALSE	FALSE	916.3105060841968	1.4218432744408569e-6
negative	am4	e	r2	2-Hydroxybutyric acid	FALSE	FALSE	929153.6908107566	0.001441772103920176
negative	am4	e	r2	Nicotinate	FALSE	FALSE	52240.745849870465	8.106220832917881e-5
negative	am4	e	r2	5-Methylcytosine	FALSE	FALSE	3250.693880566029	5.044116814834555e-6
negative	am4	e	r2	Creatinine	FALSE	FALSE	17806.292078743605	2.763010624322661e-5
negative	am4	e	r2	Hypoxanthine	FALSE	FALSE	1075.2120948243698	1.6684116088078773e-6
negative	am4	e	r2	Acetyl-Methionine	FALSE	FALSE	1476.8031476488397	2.2915623134464514e-6
negative	am4	e	r2	Uridine	FALSE	FALSE	1597.5226705153893	2.478883358596337e-6
negative	am4	e	r2	Hydroxyphenyllactic acid	FALSE	FALSE	6334.018772533376	9.828526391556164e-6
negative	am4	e	r2	2-Hydroxy-3-methylbutyric acid	FALSE	FALSE	1307799.3798202593	0.002029318380798416
negative	am4	e	r2	Pyruvate	FALSE	FALSE	561707.0636206296	8.716034633586625e-4
negative	am4	e	r2	Adenine	FALSE	FALSE	162666.41132517112	2.5241022708395364e-4
negative	am4	e	r2	Acetyl leucine	FALSE	FALSE	22372.042078033315	3.47148017543702e-5
negative	am4	e	r2	Phenylethanolamine	FALSE	FALSE	699486.7923344367	0.0010853969092760136
negative	am4	e	r2	1-Methyladenosine	FALSE	FALSE	29506.653507189218	4.5785611495104596e-5
negative	am4	e	r2	3 4-Dimethoxyphenylacetic acid	FALSE	FALSE	326318.91043874825	5.063505711758907e-4
negative	am4	e	r2	Hydroxy-methoxycinnamic acid	FALSE	FALSE	191470.78262642006	2.971061040134874e-4
negative	am4	e	r2	4-Hydroxy-3-methylbenzoic acid	FALSE	FALSE	260898.43025538407	4.04837307776878e-4
negative	am4	e	r2	Phenylacetylglycine	FALSE	FALSE	12519.090074067208	1.9425930299544276e-5
negative	am4	e	r2	Leucic acid	FALSE	FALSE	389918.1021416143	6.050377327681269e-4
negative	am4	e	r2	Phenylpropanolamine	FALSE	FALSE	22474.85206561782	3.4874332490318066e-5
negative	am4	e	r2	Acetyl-Phenylalanine	FALSE	FALSE	18353.03011844509	2.8478482202542636e-5
negative	am4	e	r2	2-hydroxy pyridine	FALSE	FALSE	54264.94670674456	8.420317021420972e-5
negative	am4	e	r2	Phenyllactic acid	FALSE	FALSE	100804.98606443005	1.5641956576305385e-4
negative	am4	e	r2	Hydroxyoctanoic acid	FALSE	FALSE	362413.4570270189	5.623586470080028e-4
negative	am4	e	r2	Cresol	FALSE	FALSE	20060.1760796869	3.112746853126372e-5
negative	am4	e	r2	Hydroxyphenyl pyruvate	FALSE	FALSE	68081.63627168769	1.0564259167943346e-4
negative	am4	e	r2	3-Phenylbutyric acid	FALSE	FALSE	120563.20088102305	1.8707847959782445e-4
negative	am4	e	r2	Pyridoxic acid	FALSE	FALSE	22436.807841137193	3.481529909023161e-5
negative	am4	e	r2	2 3-dihydroxybenzoic acid	FALSE	FALSE	32964.513155688895	5.115118839565792e-5
negative	am4	e	r2	5- Methylthioadenosine	FALSE	FALSE	29541.389538236606	4.583951155605289e-5
negative	am4	e	r2	Methylphenyllactate	FALSE	FALSE	187308.179318534	2.906469730986016e-4
negative	am4	e	r2	Phenyl-pyruvate	FALSE	FALSE	114939.87263940505	1.783527350088137e-4
negative	am4	e	r2	Undecanoic acid	FALSE	FALSE	158861.59504456102	2.4650627596351166e-4
negative	am4	e	r2	6-Phosphogluconate	FALSE	FALSE	36142.013256547674	5.608173008206533e-5
negative	am4	e	r2	CDP	FALSE	FALSE	70752.805552635	1.097874574774242e-4
negative	am4	e	r2	Carbamoyl phosphate	FALSE	FALSE	1613501.3235637406	0.0025036775088549774
negative	am4	e	r2	Citrulline	FALSE	FALSE	31313.16342118919	4.8588781331504544e-5
negative	am4	e	r2	Cytosine	FALSE	FALSE	42233.95300545171	6.55346213266433e-5
negative	am4	e	r2	N-acetyl-glutamine	FALSE	FALSE	37796.06074402562	5.864832326206344e-5
negative	am4	e	r2	Orotate	FALSE	FALSE	23413.47318574779	3.633079524834991e-5
negative	am4	e	r2	Phosphoenolpyruvate	FALSE	FALSE	901200.0765873848	0.0013983963507056174
negative	am4	e	r2	Thymine	FALSE	FALSE	18621.427002332402	2.8894954895698674e-5
negative	am4	e	r2	UDP	FALSE	FALSE	185510.31402904	2.878572171662574e-4
negative	am4	e	r2	Xylose-5-phosphate	FALSE	FALSE	45115.103957076404	7.000531665973822e-5
negative	am4	e	r2	Ribulose-5-phosphate	FALSE	FALSE	85432.48069618123	1.3256597767907945e-4
negative	am4	e	r2	Succinyl-CoA	FALSE	FALSE	12942.784978848003	2.00833796540779e-5
negative	am4	e	r2	Coenzyme A	FALSE	FALSE	66359.51482767296	1.029703678244363e-4
negative	am4	e	r2	Acetyl CoA	FALSE	FALSE	324321.2932791038	5.032508593375032e-4
negative	am4	e	r2	Propionyl CoA	FALSE	FALSE	5613.462736201472	8.71043623836726e-6
negative	am4	e	r2	Butyryl CoA	FALSE	FALSE	10496.887917392301	1.6288069806909247e-5
negative	am4	e	r2	Itaconic acid	FALSE	FALSE	116050.539509683	1.8007616195760815e-4
negative	am4	e	r2	NegIS_Alanine-2H4-15N	TRUE	FALSE	81073037.90986274	0.12580141002992593
negative	am4	e	r2	NegIS_Glucose-2H7-13C6	TRUE	FALSE	12745953.377067212	0.019777955142047124
negative	am4	e	r2	NegIS_Glutamine-2H5-15N2	TRUE	FALSE	16297042.05175331	0.025288195956181782
negative	am4	e	r2	NegIS_Glycine-13C2_15N1	TRUE	FALSE	1931249.856777559	0.0029967293858264737
negative	am4	e	r2	NegIS_Inosine-15N4	TRUE	FALSE	1405515.0252005009	0.0021809442022519766
negative	am4	e	r2	NegIS_Lysine-2H8	TRUE	FALSE	151863.6336649831	2.3564750674032493e-4
negative	am4	e	r2	NegIS_Malate-2H3	TRUE	FALSE	11401156.008631198	0.017691226810220256
negative	am4	e	r2	NegIS_Serine-13C3-15N1	TRUE	FALSE	490627.15059648367	7.613084316961787e-4
negative	am4	e	r2	NegIS_Thymine-2H4	TRUE	FALSE	3014485.1772629786	0.004677590671212038
negative	am5	e	r1	GTP	FALSE	FALSE	18650.07318111839	2.120820427410702e-5
negative	am5	e	r1	CTP	FALSE	FALSE	14224.421425280989	1.6175509465226303e-5
negative	am5	e	r1	UTP	FALSE	FALSE	65407.07197923049	7.437861128132888e-5
negative	am5	e	r1	Fructose-1 6-bisphosphate	FALSE	FALSE	172279.40431469	1.9591005158234537e-4
negative	am5	e	r1	Thiamine pyrophosphate	FALSE	FALSE	77518.67534541097	8.815149870018213e-5
negative	am5	e	r1	ATP	FALSE	FALSE	297735.37418799795	3.385741478912574e-4
negative	am5	e	r1	Glutathione disulfide	FALSE	FALSE	442471.588048181	5.031630564492841e-4
negative	am5	e	r1	Lysine	FALSE	FALSE	243349.09754405302	2.767279956766573e-4
negative	am5	e	r1	NADP+	FALSE	FALSE	148564.2115445871	1.6894197227328568e-4
negative	am5	e	r1	Pyridoxamine 5-phosphate	FALSE	FALSE	8026.405705174406	9.1273449776345e-6
negative	am5	e	r1	Arginine	FALSE	FALSE	57639.59610739352	6.554571216161416e-5
negative	am5	e	r1	Ornithine	FALSE	FALSE	19284.96870571279	2.1930185032442407e-5
negative	am5	e	r1	NADPH	FALSE	FALSE	50039.954441496164	5.690366817094811e-5
negative	am5	e	r1	Glucose-6-phosphate	FALSE	FALSE	1474087.1296818703	0.0016762798011846973
negative	am5	e	r1	ADP	FALSE	FALSE	1031552.3447089698	0.0011730448794255064
negative	am5	e	r1	Isocitrate	FALSE	FALSE	541215457.703365	0.615451096186475
negative	am5	e	r1	GMP	FALSE	FALSE	197084.93264380403	2.241180219651968e-4
negative	am5	e	r1	CMP	FALSE	FALSE	203059.53012699902	2.309121231276227e-4
negative	am5	e	r1	Aconitate	FALSE	FALSE	5639976.129973875	0.006413581582439701
negative	am5	e	r1	UDP-D-Glucose	FALSE	FALSE	5291563.170055176	0.006017378674604305
negative	am5	e	r1	UMP	FALSE	FALSE	689826.4774947085	7.844462971441354e-4
negative	am5	e	r1	NAD+	FALSE	FALSE	1286626.7617516494	0.00146310649415508
negative	am5	e	r1	ADP-D-Glucose	FALSE	FALSE	28150.309204644313	3.201153701615504e-5
negative	am5	e	r1	Dihydroxyacetone phosphate	FALSE	FALSE	41673.64331851677	4.7389794761780045e-5
negative	am5	e	r1	UDP-N-acetyl-glucosamine	FALSE	FALSE	1464654.0761120096	0.001665552865955256
negative	am5	e	r1	5-Aminoimidazole-4-carboxamide ribonucleotide	FALSE	FALSE	93498.7413266869	1.0632346512376294e-4
negative	am5	e	r1	Glycerol-3-phosphate	FALSE	FALSE	341209.1201426701	3.880109557693502e-4
negative	am5	e	r1	AMP	FALSE	FALSE	1075179.4992360997	0.001222656138111941
negative	am5	e	r1	Deoxyribose phosphate	FALSE	FALSE	69716.81571325797	7.92794995830887e-5
negative	am5	e	r1	N-carbomoyl-L-aspartate	FALSE	FALSE	2485152.3848025184	0.0028260274861835917
negative	am5	e	r1	Tartaric acid	FALSE	FALSE	97582.84925415454	1.1096776835850444e-4
negative	am5	e	r1	Malate	FALSE	FALSE	43904330.91979647	0.049926453886933175
negative	am5	e	r1	Aminoadipic acid	FALSE	FALSE	8767.919844702705	9.970568657806236e-6
negative	am5	e	r1	Galacturonic acid	FALSE	FALSE	37771.19320984651	4.295206638021094e-5
negative	am5	e	r1	NADH	FALSE	FALSE	22995.724778312695	2.6149925729157603e-5
negative	am5	e	r1	Glutathione	FALSE	FALSE	527507.0014849154	5.998623241242896e-4
negative	am5	e	r1	Aspartate	FALSE	FALSE	625139.0259175539	7.108860127583005e-4
negative	am5	e	r1	Glutamate	FALSE	FALSE	36967745.626869515	0.042038414176391974
negative	am5	e	r1	Malonic acid	FALSE	FALSE	5589711.217951597	0.006356422100456126
negative	am5	e	r1	2-Hydroxyglutarate	FALSE	FALSE	11394274.452741504	0.012957166323273891
negative	am5	e	r1	N-Acetylaspartate	FALSE	FALSE	890614.7438302296	0.0010127756193367562
negative	am5	e	r1	FAD	FALSE	FALSE	11000.95913668131	1.2509902042531839e-5
negative	am5	e	r1	Glucuronic acid	FALSE	FALSE	22314.51938859399	2.5375283028430648e-5
negative	am5	e	r1	Succinate	FALSE	FALSE	23948394.223214414	0.027233267762025927
negative	am5	e	r1	N-acetyl-glutamate	FALSE	FALSE	1750431.9337320505	0.0019905293484903793
negative	am5	e	r1	Inositol	FALSE	FALSE	24762.06091580659	2.8158540776236003e-5
negative	am5	e	r1	Glycerophosphocholine (+HAc)	FALSE	FALSE	58830.52245456311	6.689999152560935e-5
negative	am5	e	r1	Acetyllysine	FALSE	FALSE	51754.31105126062	5.885317393564184e-5
negative	am5	e	r1	N-acetyl-L-ornithine	FALSE	FALSE	62279.10235475325	7.082159474231191e-5
negative	am5	e	r1	Fumarate	FALSE	FALSE	3385197.415955929	0.0038495268950718025
negative	am5	e	r1	a-ketoglutarate	FALSE	FALSE	523556.1915927856	5.953696027056262e-4
negative	am5	e	r1	Asparagine	FALSE	FALSE	129236.97946681897	1.4696372682739835e-4
negative	am5	e	r1	Serine	FALSE	FALSE	293571.4794762862	3.3383911394451333e-4
negative	am5	e	r1	S-adenosyl-L-homocysteine	FALSE	FALSE	4445.663226269564	5.0554511460076e-6
negative	am5	e	r1	Glutamine	FALSE	FALSE	1236545.4126767202	0.0014061557534695538
negative	am5	e	r1	Histidine	FALSE	FALSE	13305.661744708708	1.5130728418248031e-5
negative	am5	e	r1	Methionine sulfoxide	FALSE	FALSE	8976.554283960762	1.020782037062409e-5
negative	am5	e	r1	Glycine	FALSE	FALSE	121313.88507339198	1.379538638232707e-4
negative	am5	e	r1	Threonine	FALSE	FALSE	350047.3468518843	3.980614749093851e-4
negative	am5	e	r1	Alanine	FALSE	FALSE	676911.7557517665	7.697601318831398e-4
negative	am5	e	r1	Threonic acid	FALSE	FALSE	134761.46365506202	1.532459750542821e-4
negative	am5	e	r1	Glucose	FALSE	FALSE	1279479.100406699	0.0014549784262159516
negative	am5	e	r1	Thiamine	FALSE	FALSE	19360166.416272808	0.022015697211993354
negative	am5	e	r1	Proline	FALSE	FALSE	122539.14183727802	1.393471825241879e-4
negative	am5	e	r1	Sorbitol	FALSE	FALSE	1016346.2714989802	0.0011557530702345923
negative	am5	e	r1	Pipecolic acid	FALSE	FALSE	2728.8223288582203	3.1031203371770942e-6
negative	am5	e	r1	Pyridoxamine	FALSE	FALSE	27272.791747217012	3.101365516816021e-5
negative	am5	e	r1	Valine	FALSE	FALSE	454334.4425880678	5.166530754917107e-4
negative	am5	e	r1	Tyrosine	FALSE	FALSE	95077.76522380668	1.0811907530923487e-4
negative	am5	e	r1	Glycerate	FALSE	FALSE	164589.39097025013	1.8716524011186782e-4
negative	am5	e	r1	Acetyl glycine	FALSE	FALSE	49107.24921983831	5.584302874737349e-5
negative	am5	e	r1	Methionine	FALSE	FALSE	111030.686933308	1.2626017422601946e-4
negative	am5	e	r1	Pantothenate	FALSE	FALSE	41144.33001891761	4.678787837926066e-5
negative	am5	e	r1	Isoleucine	FALSE	FALSE	236089.50608573217	2.684726447673372e-4
negative	am5	e	r1	D-Xylose	FALSE	FALSE	28074.820390439785	3.192569380382488e-5
negative	am5	e	r1	Xanthine	FALSE	FALSE	8793.075162256615	9.999174396136714e-6
negative	am5	e	r1	Lactate	FALSE	FALSE	14066108.289850721	0.01599548136116081
negative	am5	e	r1	N-Acetyl-L-alanine	FALSE	FALSE	70330.25949022605	7.997708617196012e-5
negative	am5	e	r1	Leucine	FALSE	FALSE	161051.50626351187	1.831420826244909e-4
negative	am5	e	r1	Pterin	FALSE	FALSE	43800.27736996062	4.980812786649703e-5
negative	am5	e	r1	Phenylalanine	FALSE	FALSE	293923.356721985	3.342392563157371e-4
negative	am5	e	r1	Guanine	FALSE	FALSE	4193.873814788601	4.769125123536452e-6
negative	am5	e	r1	Tryptophan	FALSE	FALSE	49126.44529524517	5.586485784608726e-5
negative	am5	e	r1	Acetylcholine	FALSE	FALSE	1200.8406362146795	1.3655535432039702e-6
negative	am5	e	r1	2-Hydroxybutyric acid	FALSE	FALSE	1241247.2699717092	0.001411502539458618
negative	am5	e	r1	Nicotinate	FALSE	FALSE	61799.3071567794	7.027598859537909e-5
negative	am5	e	r1	5-Methylcytosine	FALSE	FALSE	3956.860580447003	4.499602047633864e-6
negative	am5	e	r1	Creatinine	FALSE	FALSE	65277.60706256191	7.423138835236916e-5
negative	am5	e	r1	Hypoxanthine	FALSE	FALSE	906.6049603364918	1.0309591285787113e-6
negative	am5	e	r1	Acetyl-Methionine	FALSE	TRUE	803.7936178562945	9.140457024575359e-7
negative	am5	e	r1	Uridine	FALSE	FALSE	8097.08597488434	9.207720083061694e-6
negative	am5	e	r1	Hydroxyphenyllactic acid	FALSE	FALSE	9519.81312464556	1.0825595129739904e-5
negative	am5	e	r1	2-Hydroxy-3-methylbutyric acid	FALSE	FALSE	1615476.0555173294	0.0018370622920679403
negative	am5	e	r1	Pyruvate	FALSE	FALSE	1026516.1297305595	0.0011673178736924363
negative	am5	e	r1	Adenine	FALSE	FALSE	53273.99400388107	6.058130369567315e-5
negative	am5	e	r1	Acetyl leucine	FALSE	FALSE	16307.618545474503	1.854444762644622e-5
negative	am5	e	r1	Phenylethanolamine	FALSE	FALSE	1085591.40786194	0.0012344961927259744
negative	am5	e	r1	1-Methyladenosine	FALSE	FALSE	38174.821367847195	4.3411058060432684e-5
negative	am5	e	r1	3 4-Dimethoxyphenylacetic acid	FALSE	FALSE	295945.24680500216	3.3653847828039044e-4
negative	am5	e	r1	Hydroxy-methoxycinnamic acid	FALSE	FALSE	224109.08225192688	2.548489300778442e-4
negative	am5	e	r1	4-Hydroxy-3-methylbenzoic acid	FALSE	FALSE	399938.54123462	4.547959783975258e-4
negative	am5	e	r1	Phenylacetylglycine	FALSE	FALSE	24876.254321909393	2.828839748295586e-5
negative	am5	e	r1	Leucic acid	FALSE	FALSE	772314.4978059536	8.782487593617484e-4
negative	am5	e	r1	Phenylpropanolamine	FALSE	FALSE	22763.48198589439	2.5885827431260143e-5
negative	am5	e	r1	Acetyl-Phenylalanine	FALSE	FALSE	17827.11860575291	2.0272369407768147e-5
negative	am5	e	r1	2-hydroxy pyridine	FALSE	FALSE	43389.80599015949	4.934135431622966e-5
negative	am5	e	r1	Phenyllactic acid	FALSE	FALSE	102584.32992860007	1.16655275468344e-4
negative	am5	e	r1	Hydroxyoctanoic acid	FALSE	FALSE	425547.3784533506	4.839174432670071e-4
negative	am5	e	r1	Cresol	FALSE	FALSE	33634.54183659448	3.824801259539713e-5
negative	am5	e	r1	Hydroxyphenyl pyruvate	FALSE	FALSE	76150.32056485514	8.659545399067077e-5
negative	am5	e	r1	3-Phenylbutyric acid	FALSE	FALSE	107306.09200682193	1.220246964736216e-4
negative	am5	e	r1	Pyridoxic acid	FALSE	FALSE	23095.332520132513	2.6263196133797943e-5
negative	am5	e	r1	2 3-dihydroxybenzoic acid	FALSE	FALSE	1257027.7394436407	0.001429447531783949
negative	am5	e	r1	5- Methylthioadenosine	FALSE	FALSE	108179.42580192404	1.2301782080863808e-4
negative	am5	e	r1	Methylphenyllactate	FALSE	FALSE	165282.7282186611	1.879536787336548e-4
negative	am5	e	r1	Phenyl-pyruvate	FALSE	FALSE	252257.40250235095	2.86858205325534e-4
negative	am5	e	r1	Undecanoic acid	FALSE	FALSE	214744.25514618919	2.441995795728147e-4
negative	am5	e	r1	6-Phosphogluconate	FALSE	FALSE	259623.51350892076	2.952346865015565e-4
negative	am5	e	r1	CDP	FALSE	FALSE	56167.69377914836	6.387191683942952e-5
negative	am5	e	r1	Carbamoyl phosphate	FALSE	FALSE	1655729.1359121292	0.001882836672864433
negative	am5	e	r1	Citrulline	FALSE	FALSE	126545.7491347781	1.439033547807953e-4
negative	am5	e	r1	Cytosine	FALSE	FALSE	67720.06570676668	7.700886602520727e-5
negative	am5	e	r1	N-acetyl-glutamine	FALSE	FALSE	1173.7954311256701	1.3347986915423945e-6
negative	am5	e	r1	Orotate	FALSE	FALSE	120500.15894078898	1.3702852321598047e-4
negative	am5	e	r1	Phosphoenolpyruvate	FALSE	FALSE	3318366.649021632	0.003773529308189797
negative	am5	e	r1	Thymine	FALSE	FALSE	22657.899760899098	2.5765763055444082e-5
negative	am5	e	r1	UDP	FALSE	FALSE	608974.9626196037	6.925048110872213e-4
negative	am5	e	r1	Xylose-5-phosphate	FALSE	FALSE	137868.8578910521	1.5677959398848447e-4
negative	am5	e	r1	Ribulose-5-phosphate	FALSE	FALSE	352961.26385146874	4.013750783663167e-4
negative	am5	e	r1	Succinyl-CoA	FALSE	FALSE	57352.98094576965	6.521978352654963e-5
negative	am5	e	r1	Coenzyme A	FALSE	FALSE	151929.04961363488	1.7276834723839332e-4
negative	am5	e	r1	Acetyl CoA	FALSE	FALSE	1392425.4093517403	0.0015834169781106411
negative	am5	e	r1	Propionyl CoA	FALSE	FALSE	12644.856471649106	1.4379284009405517e-5
negative	am5	e	r1	Butyryl CoA	FALSE	FALSE	28552.367536708483	3.246874354578713e-5
negative	am5	e	r1	Itaconic acid	FALSE	FALSE	531175.9895188863	6.040345676832312e-4
negative	am5	e	r1	NegIS_Alanine-2H4-15N	TRUE	FALSE	75826579.78188674	0.08622730741074183
negative	am5	e	r1	NegIS_Glucose-2H7-13C6	TRUE	FALSE	10370708.315525003	0.01179320307683882
negative	am5	e	r1	NegIS_Glutamine-2H5-15N2	TRUE	FALSE	17045232.505807377	0.019383236160638695
negative	am5	e	r1	NegIS_Glycine-13C2_15N1	TRUE	FALSE	2342805.9413509816	0.0026641561400985152
negative	am5	e	r1	NegIS_Inosine-15N4	TRUE	FALSE	1125065.290674231	0.0012793844975623754
negative	am5	e	r1	NegIS_Lysine-2H8	TRUE	FALSE	141441.63693256097	1.6084243208047016e-4
negative	am5	e	r1	NegIS_Malate-2H3	TRUE	FALSE	16043948.752270928	0.018244611653639727
negative	am5	e	r1	NegIS_Serine-13C3-15N1	TRUE	FALSE	650745.0968896109	7.40004331949802e-4
negative	am5	e	r1	NegIS_Thymine-2H4	TRUE	FALSE	2289746.5867515914	0.0026038189167499545
negative	am5	e	r2	GTP	FALSE	FALSE	26566.74755429661	2.068386890543106e-5
negative	am5	e	r2	CTP	FALSE	FALSE	32416.22516268561	2.5238051827894408e-5
negative	am5	e	r2	UTP	FALSE	FALSE	127028.88902891212	9.889990795849732e-5
negative	am5	e	r2	Fructose-1 6-bisphosphate	FALSE	FALSE	230241.58016524208	1.7925742136797488e-4
negative	am5	e	r2	Thiamine pyrophosphate	FALSE	FALSE	163607.05564413892	1.2737829062555456e-4
negative	am5	e	r2	ATP	FALSE	FALSE	609720.1798754175	4.74705164558217e-4
negative	am5	e	r2	Glutathione disulfide	FALSE	FALSE	1248501.9036463308	9.720365524768713e-4
negative	am5	e	r2	Lysine	FALSE	FALSE	215649.71327048796	1.678967434633971e-4
negative	am5	e	r2	NADP+	FALSE	FALSE	431976.584356461	3.3632069649413605e-4
negative	am5	e	r2	Pyridoxamine 5-phosphate	FALSE	FALSE	4526.488709909913	3.524153601653376e-6
negative	am5	e	r2	Arginine	FALSE	FALSE	135560.23725953707	1.0554209432429837e-4
negative	am5	e	r2	Ornithine	FALSE	FALSE	41057.910210834074	3.196614228355196e-5
negative	am5	e	r2	NADPH	FALSE	FALSE	65102.85058736428	5.068662711409428e-5
negative	am5	e	r2	Glucose-6-phosphate	FALSE	FALSE	2775053.5778154377	0.0021605521824518146
negative	am5	e	r2	ADP	FALSE	FALSE	2811999.8361436175	0.0021893171474609645
negative	am5	e	r2	Isocitrate	FALSE	FALSE	729750464.199042	0.5681562225229675
negative	am5	e	r2	GMP	FALSE	FALSE	361528.38199421327	2.814723798416767e-4
negative	am5	e	r2	CMP	FALSE	FALSE	414777.23870737094	3.229299338523071e-4
negative	am5	e	r2	Aconitate	FALSE	FALSE	13936037.31953561	0.010850073701695972
negative	am5	e	r2	UDP-D-Glucose	FALSE	FALSE	9739417.53900015	0.007582743622651506
negative	am5	e	r2	UMP	FALSE	FALSE	1246463.4559622698	9.704494938961578e-4
negative	am5	e	r2	NAD+	FALSE	FALSE	2856935.1931216014	0.0022243021237382376
negative	am5	e	r2	ADP-D-Glucose	FALSE	FALSE	95175.70063660131	7.410021535103696e-5
negative	am5	e	r2	Dihydroxyacetone phosphate	FALSE	FALSE	86779.09384272055	6.756293359232227e-5
negative	am5	e	r2	UDP-N-acetyl-glucosamine	FALSE	FALSE	3681461.307764719	0.002866247097601795
negative	am5	e	r2	5-Aminoimidazole-4-carboxamide ribonucleotide	FALSE	FALSE	212916.68781420207	1.657689127932148e-4
negative	am5	e	r2	Glycerol-3-phosphate	FALSE	FALSE	878515.0119838596	6.839786956303035e-4
negative	am5	e	r2	AMP	FALSE	FALSE	2164027.099257418	0.0016848299829461673
negative	am5	e	r2	Deoxyribose phosphate	FALSE	FALSE	206610.61135181383	1.6085923920260741e-4
negative	am5	e	r2	N-carbomoyl-L-aspartate	FALSE	FALSE	5736409.99633092	0.004466152738848294
negative	am5	e	r2	Tartaric acid	FALSE	FALSE	149900.56248100704	1.1670693135735704e-4
negative	am5	e	r2	Malate	FALSE	FALSE	98536866.17254372	0.07671709222588956
negative	am5	e	r2	Aminoadipic acid	FALSE	FALSE	5358.758156907167	4.1721272424049976e-6
negative	am5	e	r2	Galacturonic acid	FALSE	FALSE	57959.479890937306	4.512506777282303e-5
negative	am5	e	r2	NADH	FALSE	FALSE	111246.70012341601	8.661249017448499e-5
negative	am5	e	r2	Glutathione	FALSE	FALSE	3221527.2774288477	0.0025081597867945243
negative	am5	e	r2	Aspartate	FALSE	FALSE	2675553.1513909204	0.00208308489851
negative	am5	e	r2	Glutamate	FALSE	FALSE	96606513.95908366	0.07521419270674766
negative	am5	e	r2	Malonic acid	FALSE	FALSE	7780166.023886686	0.006057344195847377
negative	am5	e	r2	2-Hydroxyglutarate	FALSE	FALSE	20050812.21635587	0.015610807099473
negative	am5	e	r2	N-Acetylaspartate	FALSE	FALSE	2369880.083226999	0.0018450993620079635
negative	am5	e	r2	FAD	FALSE	FALSE	58651.180399207034	4.566359973295969e-5
negative	am5	e	r2	Glucuronic acid	FALSE	FALSE	54252.06274338884	4.2238612436093726e-5
negative	am5	e	r2	Succinate	FALSE	FALSE	48516007.71386029	0.037772736061026546
negative	am5	e	r2	N-acetyl-glutamate	FALSE	FALSE	5303677.838291499	0.00412924378114624
negative	am5	e	r2	Inositol	FALSE	FALSE	27277.202402581992	2.1237002288248418e-5
negative	am5	e	r2	Glycerophosphocholine (+HAc)	FALSE	FALSE	40697.50162660919	3.168554173607192e-5
negative	am5	e	r2	Acetyllysine	FALSE	FALSE	228686.8881199111	1.7804699670503034e-4
negative	am5	e	r2	N-acetyl-L-ornithine	FALSE	FALSE	282145.7955262178	2.1966808827296658e-4
negative	am5	e	r2	Fumarate	FALSE	FALSE	7375320.391440271	0.005742146636517097
negative	am5	e	r2	a-ketoglutarate	FALSE	FALSE	851020.5970028642	6.625725798106629e-4
negative	am5	e	r2	Asparagine	FALSE	FALSE	303967.13211361313	2.3665735895401295e-4
negative	am5	e	r2	Serine	FALSE	FALSE	520169.44686022634	4.0498433711082753e-4
negative	am5	e	r2	S-adenosyl-L-homocysteine	FALSE	FALSE	11182.048493412196	8.705921741425394e-6
negative	am5	e	r2	Glutamine	FALSE	FALSE	3768761.248931428	0.0029342155433008253
negative	am5	e	r2	Histidine	FALSE	FALSE	16485.492293386113	1.2834983309153533e-5
negative	am5	e	r2	Methionine sulfoxide	FALSE	FALSE	14508.780685790713	1.1295990112045568e-5
negative	am5	e	r2	Glycine	FALSE	FALSE	264720.668056084	2.0610154041022746e-4
negative	am5	e	r2	Threonine	FALSE	FALSE	1156806.97307208	9.006463335795765e-4
negative	am5	e	r2	Alanine	FALSE	FALSE	1296541.401005679	0.0010094382955254991
negative	am5	e	r2	Threonic acid	FALSE	FALSE	198894.54003109608	1.5485179672826996e-4
negative	am5	e	r2	Glucose	FALSE	FALSE	2093865.893549221	0.0016302051110777015
negative	am5	e	r2	Thiamine	FALSE	FALSE	30014333.172430027	0.02336802920092754
negative	am5	e	r2	Proline	FALSE	FALSE	252291.42988945884	1.964246037695103e-4
negative	am5	e	r2	Sorbitol	FALSE	FALSE	1784428.019331809	0.0013892884383985464
negative	am5	e	r2	Pipecolic acid	FALSE	FALSE	6784.859438429454	5.28243598052163e-6
negative	am5	e	r2	Pyridoxamine	FALSE	FALSE	25480.40319075619	1.9838082105383346e-5
negative	am5	e	r2	Valine	FALSE	FALSE	556202.4240814566	4.330382558524077e-4
negative	am5	e	r2	Tyrosine	FALSE	FALSE	214370.02927941602	1.669004297122458e-4
negative	am5	e	r2	Glycerate	FALSE	FALSE	216904.575647566	1.688737320408958e-4
negative	am5	e	r2	Acetyl glycine	FALSE	FALSE	57409.66185493698	4.4697000161037676e-5
negative	am5	e	r2	Methionine	FALSE	FALSE	224439.63996122783	1.7474024927787566e-4
negative	am5	e	r2	Pantothenate	FALSE	FALSE	123308.31569620498	9.600320971158258e-5
negative	am5	e	r2	Isoleucine	FALSE	FALSE	405060.81217530294	3.153650901616069e-4
negative	am5	e	r2	D-Xylose	FALSE	FALSE	43047.29845959628	3.351500503595718e-5
negative	am5	e	r2	Xanthine	FALSE	FALSE	13688.687486229894	1.0657496438882022e-5
negative	am5	e	r2	Lactate	FALSE	FALSE	8708935.359279014	0.006780449014658076
negative	am5	e	r2	N-Acetyl-L-alanine	FALSE	FALSE	81637.22509327592	6.355966827258067e-5
negative	am5	e	r2	Leucine	FALSE	FALSE	337426.0422868731	2.627072060543358e-4
negative	am5	e	r2	Pterin	FALSE	FALSE	160113.82786288307	1.2465859506114135e-4
negative	am5	e	r2	Phenylalanine	FALSE	FALSE	531039.3643395148	4.134472454022903e-4
negative	am5	e	r2	Guanine	FALSE	FALSE	9319.009661542415	7.2554298855681735e-6
negative	am5	e	r2	Tryptophan	FALSE	FALSE	138857.43579696005	1.0810916890367068e-4
negative	am5	e	r2	Acetylcholine	FALSE	FALSE	1628.3645972439695	1.2677833366994953e-6
negative	am5	e	r2	2-Hydroxybutyric acid	FALSE	FALSE	1964583.3145581402	0.0015295505650086973
negative	am5	e	r2	Nicotinate	FALSE	FALSE	96823.58058932566	7.538319260839136e-5
negative	am5	e	r2	5-Methylcytosine	FALSE	FALSE	2257.11974419387	1.7573084095954993e-6
negative	am5	e	r2	Creatinine	FALSE	FALSE	20918.980743552005	1.6286730411788354e-5
negative	am5	e	r2	Hypoxanthine	FALSE	FALSE	1927.8085453312597	1.500919114954012e-6
negative	am5	e	r2	Acetyl-Methionine	FALSE	FALSE	8253.859057452755	6.426143748283066e-6
negative	am5	e	r2	Uridine	FALSE	FALSE	9216.053651539973	7.175272214420643e-6
negative	am5	e	r2	Hydroxyphenyllactic acid	FALSE	FALSE	14688.15098835259	1.143564107293699e-5
negative	am5	e	r2	2-Hydroxy-3-methylbutyric acid	FALSE	FALSE	2527798.610821122	0.00196804877897441
negative	am5	e	r2	Pyruvate	FALSE	FALSE	1457827.4116065796	0.0011350095079116181
negative	am5	e	r2	Adenine	FALSE	FALSE	112837.87921158	8.78513222745523e-5
negative	am5	e	r2	Acetyl leucine	FALSE	FALSE	32840.25672473999	2.556818682930445e-5
negative	am5	e	r2	Phenylethanolamine	FALSE	FALSE	1776861.0027935014	0.0013833970443630629
negative	am5	e	r2	1-Methyladenosine	FALSE	FALSE	54431.016051175604	4.2377938740560984e-5
negative	am5	e	r2	3 4-Dimethoxyphenylacetic acid	FALSE	FALSE	531125.3278124268	4.135141733241496e-4
negative	am5	e	r2	Hydroxy-methoxycinnamic acid	FALSE	FALSE	318915.1646707542	2.48295334026954e-4
negative	am5	e	r2	4-Hydroxy-3-methylbenzoic acid	FALSE	FALSE	534689.8200007684	4.162893526714674e-4
negative	am5	e	r2	Phenylacetylglycine	FALSE	FALSE	38528.45117894241	2.999680076327827e-5
negative	am5	e	r2	Leucic acid	FALSE	FALSE	704552.745936358	5.485382282541489e-4
negative	am5	e	r2	Phenylpropanolamine	FALSE	FALSE	36965.35668889007	2.8779834273384574e-5
negative	am5	e	r2	Acetyl-Phenylalanine	FALSE	FALSE	34790.040894725484	2.7086215337816488e-5
negative	am5	e	r2	2-hydroxy pyridine	FALSE	FALSE	76801.52433266916	5.979477381593472e-5
negative	am5	e	r2	Phenyllactic acid	FALSE	FALSE	168843.24861173905	1.3145499322846183e-4
negative	am5	e	r2	Hydroxyoctanoic acid	FALSE	FALSE	664895.1041807208	5.17662282243231e-4
negative	am5	e	r2	Cresol	FALSE	FALSE	54082.46054343641	4.2106566551940277e-5
negative	am5	e	r2	Hydroxyphenyl pyruvate	FALSE	FALSE	107898.31547733396	8.400556401903552e-5
negative	am5	e	r2	3-Phenylbutyric acid	FALSE	FALSE	193490.28774421292	1.5064424946997982e-4
negative	am5	e	r2	Pyridoxic acid	FALSE	FALSE	35238.873221036294	2.74356592800589e-5
negative	am5	e	r2	2 3-dihydroxybenzoic acid	FALSE	FALSE	1669070.1885692205	0.0012994751767701996
negative	am5	e	r2	5- Methylthioadenosine	FALSE	FALSE	301151.34361931507	2.3446509210002753e-4
negative	am5	e	r2	Methylphenyllactate	FALSE	FALSE	302733.87006589194	2.3569718757929066e-4
negative	am5	e	r2	Phenyl-pyruvate	FALSE	FALSE	506929.6021251763	3.946762927305982e-4
negative	am5	e	r2	Undecanoic acid	FALSE	FALSE	291950.9064221069	2.2730197826869488e-4
negative	am5	e	r2	6-Phosphogluconate	FALSE	FALSE	324744.876726797	2.5283412823490735e-4
negative	am5	e	r2	CDP	FALSE	FALSE	140133.11663818988	1.0910236595314919e-4
negative	am5	e	r2	Carbamoyl phosphate	FALSE	FALSE	2561573.884505469	0.0019943449347873976
negative	am5	e	r2	Citrulline	FALSE	FALSE	318790.9732018227	2.4819864322740085e-4
negative	am5	e	r2	Cytosine	FALSE	FALSE	82629.28693813845	6.43320502551052e-5
negative	am5	e	r2	N-acetyl-glutamine	FALSE	FALSE	315233.455251098	2.454288937587796e-4
negative	am5	e	r2	Orotate	FALSE	FALSE	243962.18860151494	1.8993977025613307e-4
negative	am5	e	r2	Phosphoenolpyruvate	FALSE	FALSE	4993930.991795385	0.0038880865542895364
negative	am5	e	r2	Thymine	FALSE	FALSE	45451.3880123174	3.538673860227994e-5
negative	am5	e	r2	UDP	FALSE	FALSE	887675.2821593436	6.911105369315695e-4
negative	am5	e	r2	Xylose-5-phosphate	FALSE	FALSE	320330.2677150789	2.4939707995188013e-4
negative	am5	e	r2	Ribulose-5-phosphate	FALSE	FALSE	766363.2247008214	5.966615386869808e-4
negative	am5	e	r2	Succinyl-CoA	FALSE	FALSE	181869.06035353604	1.415963995825332e-4
negative	am5	e	r2	Coenzyme A	FALSE	FALSE	1195658.5013779895	9.308946700239491e-4
negative	am5	e	r2	Acetyl CoA	FALSE	FALSE	1506346.7135791713	0.001172784808758402
negative	am5	e	r2	Propionyl CoA	FALSE	FALSE	93338.82822687666	7.267009568580141e-5
negative	am5	e	r2	Butyryl CoA	FALSE	FALSE	63980.874020281146	4.981309842259437e-5
negative	am5	e	r2	Itaconic acid	FALSE	FALSE	993942.5538480029	7.738462316963799e-4
negative	am5	e	r2	NegIS_Alanine-2H4-15N	TRUE	FALSE	78461711.88618426	0.06108733330765094
negative	am5	e	r2	NegIS_Glucose-2H7-13C6	TRUE	FALSE	10829734.820261413	0.008431623586781201
negative	am5	e	r2	NegIS_Glutamine-2H5-15N2	TRUE	FALSE	16973855.724388007	0.013215204680414918
negative	am5	e	r2	NegIS_Glycine-13C2_15N1	TRUE	FALSE	2188377.37363324	0.00170378818932696
negative	am5	e	r2	NegIS_Inosine-15N4	TRUE	FALSE	1230661.0428101695	9.581463302755647e-4
negative	am5	e	r2	NegIS_Lysine-2H8	TRUE	FALSE	168980.61711556604	1.315619431710201e-4
negative	am5	e	r2	NegIS_Malate-2H3	TRUE	FALSE	13765206.027483221	0.010717070892732045
negative	am5	e	r2	NegIS_Serine-13C3-15N1	TRUE	FALSE	607922.6092232575	4.733056437609671e-4
negative	am5	e	r2	NegIS_Thymine-2H4	TRUE	FALSE	2321152.419390109	0.001807161838462401
negative	am6	e	r1	GTP	FALSE	FALSE	2097.9105029699995	3.6527236742116234e-6
negative	am6	e	r1	CTP	FALSE	FALSE	6368.851571504135	1.1088964414754031e-5
negative	am6	e	r1	UTP	FALSE	FALSE	14395.050514413811	2.5063577178832334e-5
negative	am6	e	r1	Fructose-1 6-bisphosphate	FALSE	FALSE	100540.93126251904	1.7505429298817832e-4
negative	am6	e	r1	Thiamine pyrophosphate	FALSE	FALSE	13148.24671996339	2.2892736368112076e-5
negative	am6	e	r1	ATP	FALSE	FALSE	59096.78828178551	1.028948743624441e-4
negative	am6	e	r1	Glutathione disulfide	FALSE	FALSE	182316.31655303904	3.174354314569488e-4
negative	am6	e	r1	Lysine	FALSE	FALSE	19709.390914075015	3.43165062066343e-5
negative	am6	e	r1	NADP+	FALSE	FALSE	76779.82157828417	1.3368323938685845e-4
negative	am6	e	r1	Pyridoxamine 5-phosphate	FALSE	FALSE	1552.6766789045505	2.7034036272766752e-6
negative	am6	e	r1	Arginine	FALSE	FALSE	14216.48231300709	2.4752667683019085e-5
negative	am6	e	r1	Ornithine	FALSE	FALSE	5469.043683177669	9.522286726988314e-6
negative	am6	e	r1	NADPH	FALSE	FALSE	11168.722957039792	1.9446138764325303e-5
negative	am6	e	r1	Glucose-6-phosphate	FALSE	FALSE	233807.71557038982	4.0708837515625584e-4
negative	am6	e	r1	ADP	FALSE	FALSE	373414.1357660751	6.501605535922716e-4
negative	am6	e	r1	Isocitrate	FALSE	FALSE	377492504.5319104	0.6572615019511469
negative	am6	e	r1	GMP	FALSE	FALSE	73321.11670990246	1.2766120310982784e-4
negative	am6	e	r1	CMP	FALSE	FALSE	55684.13014444877	9.695301118353654e-5
negative	am6	e	r1	Aconitate	FALSE	FALSE	5584012.297089687	0.009722461413769855
negative	am6	e	r1	UDP-D-Glucose	FALSE	FALSE	893429.675008224	0.001555572423383022
negative	am6	e	r1	UMP	FALSE	FALSE	202562.63462502303	3.5268679476937705e-4
negative	am6	e	r1	NAD+	FALSE	FALSE	395039.46927762125	6.878129546687327e-4
negative	am6	e	r1	ADP-D-Glucose	FALSE	TRUE	73.57486573485426	1.281030117901492e-7
negative	am6	e	r1	Dihydroxyacetone phosphate	FALSE	FALSE	16419.616169734505	2.8588598331410745e-5
negative	am6	e	r1	UDP-N-acetyl-glucosamine	FALSE	FALSE	512892.0957142672	8.930090667258119e-4
negative	am6	e	r1	5-Aminoimidazole-4-carboxamide ribonucleotide	FALSE	FALSE	10806.629350229501	1.881568866266263e-5
negative	am6	e	r1	Glycerol-3-phosphate	FALSE	FALSE	86575.62511689283	1.507389543197626e-4
negative	am6	e	r1	AMP	FALSE	FALSE	342356.82566939795	5.960859056571655e-4
negative	am6	e	r1	Deoxyribose phosphate	FALSE	FALSE	6941.517490660251	1.2086047158443226e-5
negative	am6	e	r1	N-carbomoyl-L-aspartate	FALSE	FALSE	2986864.4591668784	0.005200503313279886
negative	am6	e	r1	Tartaric acid	FALSE	FALSE	73180.20483682984	1.2741585797521835e-4
negative	am6	e	r1	Malate	FALSE	FALSE	5135356.864946615	0.008941296384931597
negative	am6	e	r1	Aminoadipic acid	FALSE	FALSE	16402.659517549397	2.8559074686439127e-5
negative	am6	e	r1	Galacturonic acid	FALSE	FALSE	24706.09344344491	4.3016388111121586e-5
negative	am6	e	r1	NADH	FALSE	FALSE	2907.433638772801	5.062204354527951e-6
negative	am6	e	r1	Glutathione	FALSE	FALSE	107818.89385349907	1.8772613300159356e-4
negative	am6	e	r1	Aspartate	FALSE	FALSE	157273.141611464	2.7383214244294525e-4
negative	am6	e	r1	Glutamate	FALSE	FALSE	6790791.274776035	0.01182361402971577
negative	am6	e	r1	Malonic acid	FALSE	FALSE	3115064.2859765785	0.005423715190886048
negative	am6	e	r1	2-Hydroxyglutarate	FALSE	FALSE	7236073.379841184	0.012598905675651877
negative	am6	e	r1	N-Acetylaspartate	FALSE	FALSE	301401.16825008387	5.247770012798615e-4
negative	am6	e	r1	FAD	FALSE	FALSE	3038.2971253652613	5.290053995820772e-6
negative	am6	e	r1	Glucuronic acid	FALSE	FALSE	7309.187951966985	1.2726207258896577e-5
negative	am6	e	r1	Succinate	FALSE	FALSE	5469651.6105597075	0.009523345204333955
negative	am6	e	r1	N-acetyl-glutamate	FALSE	FALSE	349352.1187750379	6.082655828640084e-4
negative	am6	e	r1	Inositol	FALSE	FALSE	15370.874446462212	2.6762608273537922e-5
negative	am6	e	r1	Glycerophosphocholine (+HAc)	FALSE	FALSE	29439.930182495522	5.125858791044744e-5
negative	am6	e	r1	Acetyllysine	FALSE	FALSE	6053.07265271169	1.0539153957702993e-5
negative	am6	e	r1	N-acetyl-L-ornithine	FALSE	FALSE	7995.065692132188	1.3920405893952476e-5
negative	am6	e	r1	Fumarate	FALSE	FALSE	567342.1583941292	9.878134126364072e-4
negative	am6	e	r1	a-ketoglutarate	FALSE	FALSE	134078.4510994561	2.334472952203016e-4
negative	am6	e	r1	Asparagine	FALSE	FALSE	25680.761811048087	4.471340722409575e-5
negative	am6	e	r1	Serine	FALSE	FALSE	50495.017761295945	8.791811974119265e-5
negative	am6	e	r1	S-adenosyl-L-homocysteine	FALSE	FALSE	1289.2331063626204	2.2447155312494656e-6
negative	am6	e	r1	Glutamine	FALSE	FALSE	470766.228326446	8.196626809355911e-4
negative	am6	e	r1	Histidine	FALSE	FALSE	7136.531551272736	1.2425590944984606e-5
negative	am6	e	r1	Methionine sulfoxide	FALSE	FALSE	4130.171547603369	7.191143458754981e-6
negative	am6	e	r1	Glycine	FALSE	FALSE	24994.900818193688	4.3519237748195386e-5
negative	am6	e	r1	Threonine	FALSE	FALSE	44403.00761097379	7.73111707468878e-5
negative	am6	e	r1	Alanine	FALSE	FALSE	133070.84914516492	2.3169293462798322e-4
negative	am6	e	r1	Threonic acid	FALSE	FALSE	174518.29971978115	3.038581121869336e-4
negative	am6	e	r1	Glucose	FALSE	FALSE	1053315.3133679598	0.0018339532482924996
negative	am6	e	r1	Thiamine	FALSE	FALSE	12727409.408424903	0.022160006154562928
negative	am6	e	r1	Proline	FALSE	FALSE	27279.778298936715	4.7497494234717404e-5
negative	am6	e	r1	Sorbitol	FALSE	FALSE	931609.457288756	0.0016220481831520455
negative	am6	e	r1	Pipecolic acid	FALSE	FALSE	2631.454704096941	4.581690630588302e-6
negative	am6	e	r1	Pyridoxamine	FALSE	FALSE	5815.126860863001	1.0124860675966574e-5
negative	am6	e	r1	Valine	FALSE	FALSE	119906.39940200206	2.0877198677689764e-4
negative	am6	e	r1	Tyrosine	FALSE	FALSE	29804.80384289858	5.1893878431927586e-5
negative	am6	e	r1	Glycerate	FALSE	FALSE	109706.39951723097	1.9101251562533345e-4
negative	am6	e	r1	Acetyl glycine	FALSE	FALSE	14298.58600420491	2.4895620442993292e-5
negative	am6	e	r1	Methionine	FALSE	FALSE	16645.4452822193	2.898179496412297e-5
negative	am6	e	r1	Pantothenate	FALSE	FALSE	10019.522489932699	1.744523751201999e-5
negative	am6	e	r1	Isoleucine	FALSE	FALSE	87986.2846002121	1.5319508830816518e-4
negative	am6	e	r1	D-Xylose	FALSE	FALSE	15703.7439959262	2.7342175648804858e-5
negative	am6	e	r1	Xanthine	FALSE	FALSE	10218.974587907209	1.779250847477616e-5
negative	am6	e	r1	Lactate	FALSE	FALSE	14614580.963306725	0.02544580705315072
negative	am6	e	r1	N-Acetyl-L-alanine	FALSE	FALSE	25634.22103433449	4.463237393088458e-5
negative	am6	e	r1	Leucine	FALSE	FALSE	119866.26447166993	2.0870210686067648e-4
negative	am6	e	r1	Pterin	FALSE	FALSE	3220.3320201076117	5.60699943682823e-6
negative	am6	e	r1	Phenylalanine	FALSE	FALSE	54122.28431288124	9.423364291860868e-5
negative	am6	e	r1	Guanine	FALSE	FALSE	2578.24849768483	4.489051993477057e-6
negative	am6	e	r1	Tryptophan	FALSE	FALSE	18758.202276213593	3.266036822970974e-5
negative	am6	e	r1	Acetylcholine	FALSE	FALSE	1445.14219625672	2.516172689633838e-6
negative	am6	e	r1	2-Hydroxybutyric acid	FALSE	FALSE	879906.0121957092	0.0015320260408050257
negative	am6	e	r1	Nicotinate	FALSE	FALSE	16799.487046959188	2.9250000876666025e-5
negative	am6	e	r1	5-Methylcytosine	FALSE	FALSE	2857.6438837639184	4.975514185144333e-6
negative	am6	e	r1	Creatinine	FALSE	FALSE	36899.0400607455	6.424582792962718e-5
negative	am6	e	r1	Hypoxanthine	FALSE	TRUE	674.7378916435086	1.174802770282487e-6
negative	am6	e	r1	Acetyl-Methionine	FALSE	TRUE	1079.1304703745282	1.878900654303332e-6
negative	am6	e	r1	Uridine	FALSE	FALSE	4046.8369290617684	7.046047500849549e-6
negative	am6	e	r1	Hydroxyphenyllactic acid	FALSE	FALSE	5167.650704362563	8.997523984535501e-6
negative	am6	e	r1	2-Hydroxy-3-methylbutyric acid	FALSE	FALSE	760805.8869512145	0.0013246578778322719
negative	am6	e	r1	Pyruvate	FALSE	FALSE	607750.2289922097	0.0010581689001054233
negative	am6	e	r1	Adenine	FALSE	FALSE	35820.07781513432	6.236722017560477e-5
negative	am6	e	r1	Acetyl leucine	FALSE	FALSE	25207.440939558495	4.388929659099634e-5
negative	am6	e	r1	Phenylethanolamine	FALSE	FALSE	533904.8460913642	9.295948842113821e-4
negative	am6	e	r1	1-Methyladenosine	FALSE	FALSE	23643.72778283669	4.116667708022705e-5
negative	am6	e	r1	3 4-Dimethoxyphenylacetic acid	FALSE	FALSE	175235.02600644095	3.0510602198647257e-4
negative	am6	e	r1	Hydroxy-methoxycinnamic acid	FALSE	FALSE	123747.95616893111	2.1546061592886783e-4
negative	am6	e	r1	4-Hydroxy-3-methylbenzoic acid	FALSE	FALSE	234758.12545830008	4.087431572324502e-4
negative	am6	e	r1	Phenylacetylglycine	FALSE	FALSE	10714.988065531008	1.8656129763615477e-5
negative	am6	e	r1	Leucic acid	FALSE	FALSE	537194.3277577659	9.353222818013844e-4
negative	am6	e	r1	Phenylpropanolamine	FALSE	FALSE	19268.166263733987	3.354827909510367e-5
negative	am6	e	r1	Acetyl-Phenylalanine	FALSE	FALSE	5230.3610096537695	9.106710442408677e-6
negative	am6	e	r1	2-hydroxy pyridine	FALSE	FALSE	18063.096767797488	3.1450102899958105e-5
negative	am6	e	r1	Phenyllactic acid	FALSE	FALSE	65319.52794021354	1.1372943972479725e-4
negative	am6	e	r1	Hydroxyoctanoic acid	FALSE	FALSE	266200.46460392687	4.634881887327116e-4
negative	am6	e	r1	Cresol	FALSE	FALSE	19533.18408349109	3.400970815175041e-5
negative	am6	e	r1	Hydroxyphenyl pyruvate	FALSE	FALSE	43560.77697717829	7.584474223582605e-5
negative	am6	e	r1	3-Phenylbutyric acid	FALSE	FALSE	62860.16022824375	1.0944737399683316e-4
negative	am6	e	r1	Pyridoxic acid	FALSE	FALSE	16132.081590606591	2.808796479015714e-5
negative	am6	e	r1	2 3-dihydroxybenzoic acid	FALSE	FALSE	312597.633127464	5.442714421853179e-4
negative	am6	e	r1	5- Methylthioadenosine	FALSE	FALSE	12897.346883210794	2.2455888479575076e-5
negative	am6	e	r1	Methylphenyllactate	FALSE	FALSE	89236.14477888352	1.553712506647692e-4
negative	am6	e	r1	Phenyl-pyruvate	FALSE	FALSE	110726.35261323804	1.9278838109485475e-4
negative	am6	e	r1	Undecanoic acid	FALSE	FALSE	123794.9072547591	2.1554236362138907e-4
negative	am6	e	r1	6-Phosphogluconate	FALSE	FALSE	44889.28252736728	7.815783598678776e-5
negative	am6	e	r1	CDP	FALSE	FALSE	35819.85172643851	6.236682652700513e-5
negative	am6	e	r1	Carbamoyl phosphate	FALSE	FALSE	1411191.72960372	0.0024570606955242784
negative	am6	e	r1	Citrulline	FALSE	FALSE	39550.91811036333	6.886307815038157e-5
negative	am6	e	r1	Cytosine	FALSE	FALSE	37967.878556978	6.610680897413317e-5
negative	am6	e	r1	N-acetyl-glutamine	FALSE	TRUE	1037.1120784198233	1.8057413966381594e-6
negative	am6	e	r1	Orotate	FALSE	FALSE	32171.232353582993	5.601412542629135e-5
negative	am6	e	r1	Phosphoenolpyruvate	FALSE	FALSE	555020.7431556804	9.663602929358488e-4
negative	am6	e	r1	Thymine	FALSE	FALSE	17616.261768338412	3.067210747132573e-5
negative	am6	e	r1	UDP	FALSE	FALSE	79748.73459500443	1.388524870013284e-4
negative	am6	e	r1	Xylose-5-phosphate	FALSE	FALSE	32759.439777161722	5.703826786631029e-5
negative	am6	e	r1	Ribulose-5-phosphate	FALSE	FALSE	125481.66290393008	2.1847921544782044e-4
negative	am6	e	r1	Succinyl-CoA	FALSE	FALSE	1987.1940312701406	3.4599524970185427e-6
negative	am6	e	r1	Coenzyme A	FALSE	FALSE	33717.15986623509	5.8705777913890417e-5
negative	am6	e	r1	Acetyl CoA	FALSE	FALSE	188426.99158124786	3.28074878330089e-4
negative	am6	e	r1	Propionyl CoA	FALSE	FALSE	1127.2279953372595	1.962644440253035e-6
negative	am6	e	r1	Butyryl CoA	FALSE	FALSE	14543.532171968096	2.5322102251740304e-5
negative	am6	e	r1	Itaconic acid	FALSE	FALSE	438856.9992766758	7.64104735917951e-4
negative	am6	e	r1	NegIS_Alanine-2H4-15N	TRUE	FALSE	66780424.33174003	0.11627304243203601
negative	am6	e	r1	NegIS_Glucose-2H7-13C6	TRUE	FALSE	12471012.266902216	0.021713586773224096
negative	am6	e	r1	NegIS_Glutamine-2H5-15N2	TRUE	FALSE	16854570.62691199	0.029345908255111904
negative	am6	e	r1	NegIS_Glycine-13C2_15N1	TRUE	FALSE	2336280.2111233207	0.004067755047072338
negative	am6	e	r1	NegIS_Inosine-15N4	TRUE	FALSE	1331915.8218345398	0.0023190314589609674
negative	am6	e	r1	NegIS_Lysine-2H8	TRUE	FALSE	140529.71618740805	2.446797518394074e-4
negative	am6	e	r1	NegIS_Malate-2H3	TRUE	FALSE	12494072.476508511	0.021753737472427877
negative	am6	e	r1	NegIS_Serine-13C3-15N1	TRUE	FALSE	561496.3002179471	9.77635044910046e-4
negative	am6	e	r1	NegIS_Thymine-2H4	TRUE	FALSE	2794818.6500523486	0.004866127622566352
negative	am6	e	r2	GTP	FALSE	FALSE	2393.21473915176	2.9133117149528206e-6
negative	am6	e	r2	CTP	FALSE	FALSE	4104.286142793218	4.996235693231612e-6
negative	am6	e	r2	UTP	FALSE	FALSE	12737.015351051503	1.5505042413746897e-5
negative	am6	e	r2	Fructose-1 6-bisphosphate	FALSE	FALSE	53433.82666400132	6.504614510696528e-5
negative	am6	e	r2	Thiamine pyrophosphate	FALSE	FALSE	7789.2073302797535	9.48196941722972e-6
negative	am6	e	r2	ATP	FALSE	FALSE	70014.46321607928	8.523011018051506e-5
negative	am6	e	r2	Glutathione disulfide	FALSE	FALSE	109055.97755686606	1.3275618430908496e-4
negative	am6	e	r2	Lysine	FALSE	FALSE	18475.260649061187	2.249033168866159e-5
negative	am6	e	r2	NADP+	FALSE	FALSE	42180.885866288474	5.134769852909281e-5
negative	am6	e	r2	Pyridoxamine 5-phosphate	FALSE	TRUE	1270.4616896476005	1.546560307898222e-6
negative	am6	e	r2	Arginine	FALSE	FALSE	13224.044241770789	1.6097913145169798e-5
negative	am6	e	r2	Ornithine	FALSE	FALSE	4806.377172641798	5.8509061867562034e-6
negative	am6	e	r2	NADPH	FALSE	FALSE	11030.306446001792	1.3427428998722578e-5
negative	am6	e	r2	Glucose-6-phosphate	FALSE	FALSE	185739.13016828484	2.2610423335275035e-4
negative	am6	e	r2	ADP	FALSE	FALSE	232252.77956475713	2.827262980070822e-4
negative	am6	e	r2	Isocitrate	FALSE	FALSE	596889082.4595847	0.7266059029342617
negative	am6	e	r2	GMP	FALSE	FALSE	60106.30216563201	7.316869287864007e-5
negative	am6	e	r2	CMP	FALSE	FALSE	22125.937352782796	2.693437886690483e-5
negative	am6	e	r2	Aconitate	FALSE	FALSE	15916248.359800296	0.01937519105416325
negative	am6	e	r2	UDP-D-Glucose	FALSE	FALSE	725091.1282857695	8.826690074589821e-4
negative	am6	e	r2	UMP	FALSE	FALSE	133726.22354433005	1.627878047358924e-4
negative	am6	e	r2	NAD+	FALSE	FALSE	215271.29042186294	2.620543664632908e-4
negative	am6	e	r2	ADP-D-Glucose	FALSE	TRUE	330.46104054757996	4.022773238911237e-7
negative	am6	e	r2	Dihydroxyacetone phosphate	FALSE	FALSE	20668.07169642458	2.5159687684365508e-5
negative	am6	e	r2	UDP-N-acetyl-glucosamine	FALSE	FALSE	319321.36865546514	3.887167619853704e-4
negative	am6	e	r2	5-Aminoimidazole-4-carboxamide ribonucleotide	FALSE	FALSE	2459.9406243490507	2.9945385684631598e-6
negative	am6	e	r2	Glycerol-3-phosphate	FALSE	FALSE	82538.21341576336	1.0047554034396714e-4
negative	am6	e	r2	AMP	FALSE	FALSE	199674.86067644486	2.4306849747901833e-4
negative	am6	e	r2	Deoxyribose phosphate	FALSE	FALSE	9988.92378344528	1.2159731511764111e-5
negative	am6	e	r2	N-carbomoyl-L-aspartate	FALSE	FALSE	740349.5661066101	9.012434316124494e-4
negative	am6	e	r2	Tartaric acid	FALSE	FALSE	111594.31883595992	1.3584616167883554e-4
negative	am6	e	r2	Malate	FALSE	FALSE	5029127.36790343	0.006122064784748855
negative	am6	e	r2	Aminoadipic acid	FALSE	FALSE	11545.126487076805	1.4054130494505577e-5
negative	am6	e	r2	Galacturonic acid	FALSE	FALSE	38358.591180398726	4.6694737094319375e-5
negative	am6	e	r2	NADH	FALSE	FALSE	5334.182993203886	6.4934155508798845e-6
negative	am6	e	r2	Glutathione	FALSE	FALSE	26927.194805574585	3.277905270870163e-5
negative	am6	e	r2	Aspartate	FALSE	FALSE	137764.97049195698	1.6770425815888188e-4
negative	am6	e	r2	Glutamate	FALSE	FALSE	4188609.7935212627	0.005098884684772035
negative	am6	e	r2	Malonic acid	FALSE	FALSE	4721640.440764707	0.005747754342658902
negative	am6	e	r2	2-Hydroxyglutarate	FALSE	FALSE	7353198.764736672	0.008951206823703888
negative	am6	e	r2	N-Acetylaspartate	FALSE	FALSE	183070.72766174405	2.2285592965674765e-4
negative	am6	e	r2	FAD	FALSE	FALSE	6823.4224736318665	8.306298763457309e-6
negative	am6	e	r2	Glucuronic acid	FALSE	FALSE	12697.7189582955	1.545720607064798e-5
negative	am6	e	r2	Succinate	FALSE	FALSE	7062824.190396805	0.00859772761629745
negative	am6	e	r2	N-acetyl-glutamate	FALSE	FALSE	253195.73387970592	3.0822060620822896e-4
negative	am6	e	r2	Inositol	FALSE	FALSE	21316.038359028917	2.594847142290005e-5
negative	am6	e	r2	Glycerophosphocholine (+HAc)	FALSE	FALSE	42894.3239131998	5.221618199025372e-5
negative	am6	e	r2	Acetyllysine	FALSE	FALSE	4232.6747023869175	5.152525844972369e-6
negative	am6	e	r2	N-acetyl-L-ornithine	FALSE	FALSE	2181.8256882150895	2.655983282016277e-6
negative	am6	e	r2	Fumarate	FALSE	FALSE	673661.824517474	8.20063011135749e-4
negative	am6	e	r2	a-ketoglutarate	FALSE	FALSE	143936.34634963813	1.7521680656894722e-4
negative	am6	e	r2	Asparagine	FALSE	FALSE	19170.740120162987	2.333695378968885e-5
negative	am6	e	r2	Serine	FALSE	FALSE	45481.44380349141	5.536553861131708e-5
negative	am6	e	r2	S-adenosyl-L-homocysteine	FALSE	FALSE	1856.6387141667105	2.260126192576412e-6
negative	am6	e	r2	Glutamine	FALSE	FALSE	293403.5158815982	3.5716640301537207e-4
negative	am6	e	r2	Histidine	FALSE	FALSE	10587.1624828267	1.288798033237089e-5
negative	am6	e	r2	Methionine sulfoxide	FALSE	FALSE	3583.3405207939168	4.362077396194772e-6
negative	am6	e	r2	Glycine	FALSE	FALSE	21186.91518179669	2.579128700532626e-5
negative	am6	e	r2	Threonine	FALSE	FALSE	30509.506861674574	3.713987813273018e-5
negative	am6	e	r2	Alanine	FALSE	FALSE	188716.89711512192	2.2972913302794393e-4
negative	am6	e	r2	Threonic acid	FALSE	FALSE	235737.67002017918	2.8696853002371553e-4
negative	am6	e	r2	Glucose	FALSE	FALSE	3265613.02377423	0.0039753008883924796
negative	am6	e	r2	Thiamine	FALSE	FALSE	18770225.453460786	0.022849398681730793
negative	am6	e	r2	Proline	FALSE	FALSE	22451.2825521687	2.733042856744719e-5
negative	am6	e	r2	Sorbitol	FALSE	FALSE	944652.2353604863	0.0011499454598911186
negative	am6	e	r2	Pipecolic acid	FALSE	FALSE	5187.4855016963	6.314837542993003e-6
negative	am6	e	r2	Pyridoxamine	FALSE	FALSE	4962.150017437573	6.040531817164909e-6
negative	am6	e	r2	Valine	FALSE	FALSE	132445.44594609397	1.6122868665085471e-4
negative	am6	e	r2	Tyrosine	FALSE	FALSE	32881.32727483072	4.002714607503824e-5
negative	am6	e	r2	Glycerate	FALSE	FALSE	170410.6098247311	2.0744449623881476e-4
negative	am6	e	r2	Acetyl glycine	FALSE	FALSE	18128.50982186979	2.2068224457538516e-5
negative	am6	e	r2	Methionine	FALSE	FALSE	8992.522323985822	1.0946790609658441e-5
negative	am6	e	r2	Pantothenate	FALSE	FALSE	14045.798834029401	1.709825266392599e-5
negative	am6	e	r2	Isoleucine	FALSE	FALSE	102388.94952756999	1.2464026786251014e-4
negative	am6	e	r2	D-Xylose	FALSE	FALSE	19940.16733293938	2.4273594065262057e-5
negative	am6	e	r2	Xanthine	FALSE	FALSE	27621.453681215597	3.362418895265265e-5
negative	am6	e	r2	Lactate	FALSE	FALSE	6370758.4309520535	0.007755261099806443
negative	am6	e	r2	N-Acetyl-L-alanine	FALSE	FALSE	45037.47480819932	5.4825085615645356e-5
negative	am6	e	r2	Leucine	FALSE	FALSE	147824.3158524121	1.7994971536919362e-4
negative	am6	e	r2	Pterin	FALSE	FALSE	2694.7583270496	3.2803872025052047e-6
negative	am6	e	r2	Phenylalanine	FALSE	FALSE	66439.94940875751	8.087877773225256e-5
negative	am6	e	r2	Guanine	FALSE	FALSE	4442.074634794671	5.407432881191801e-6
negative	am6	e	r2	Tryptophan	FALSE	FALSE	13391.570968782908	1.6301847028906906e-5
negative	am6	e	r2	Acetylcholine	FALSE	FALSE	1237.4012521334	1.5063151270810073e-6
negative	am6	e	r2	2-Hydroxybutyric acid	FALSE	FALSE	1156777.463585431	0.0014081700572558366
negative	am6	e	r2	Nicotinate	FALSE	FALSE	64252.52932467982	7.821598427196937e-5
negative	am6	e	r2	5-Methylcytosine	FALSE	FALSE	2287.3054792967796	2.7843860977025874e-6
negative	am6	e	r2	Creatinine	FALSE	FALSE	18037.225103926205	2.1957101609333316e-5
negative	am6	e	r2	Hypoxanthine	FALSE	FALSE	4170.390428450221	5.0767058602678535e-6
negative	am6	e	r2	Acetyl-Methionine	FALSE	FALSE	1177.2869256828005	1.4331366660678921e-6
negative	am6	e	r2	Uridine	FALSE	FALSE	4666.302541690714	5.680390329302424e-6
negative	am6	e	r2	Hydroxyphenyllactic acid	FALSE	FALSE	10362.154751052905	1.261407358668375e-5
negative	am6	e	r2	2-Hydroxy-3-methylbutyric acid	FALSE	FALSE	1583316.8755788498	0.001927405646741614
negative	am6	e	r2	Pyruvate	FALSE	FALSE	738510.4112922405	8.990045889466993e-4
negative	am6	e	r2	Adenine	FALSE	FALSE	52963.26451019468	6.447331968813796e-5
negative	am6	e	r2	Acetyl leucine	FALSE	FALSE	33848.95432647978	4.120505927236112e-5
negative	am6	e	r2	Phenylethanolamine	FALSE	FALSE	1033954.8305953593	0.0012586554275414337
negative	am6	e	r2	1-Methyladenosine	FALSE	FALSE	22202.913979489887	2.7028084168269806e-5
negative	am6	e	r2	3 4-Dimethoxyphenylacetic acid	FALSE	FALSE	371932.2088299367	4.527610679585667e-4
negative	am6	e	r2	Hydroxy-methoxycinnamic acid	FALSE	FALSE	216483.28520551312	2.635297537504848e-4
negative	am6	e	r2	4-Hydroxy-3-methylbenzoic acid	FALSE	FALSE	324456.41375958116	3.949677627058217e-4
negative	am6	e	r2	Phenylacetylglycine	FALSE	FALSE	14280.639140349607	1.7384128813839832e-5
negative	am6	e	r2	Leucic acid	FALSE	FALSE	492498.7858448686	5.995293522680045e-4
negative	am6	e	r2	Phenylpropanolamine	FALSE	FALSE	32942.86562931911	4.0102058035973884e-5
negative	am6	e	r2	Acetyl-Phenylalanine	FALSE	FALSE	16931.478634425515	2.0611052677466108e-5
negative	am6	e	r2	2-hydroxy pyridine	FALSE	FALSE	63351.54904555918	7.711920162260547e-5
negative	am6	e	r2	Phenyllactic acid	FALSE	FALSE	106698.804289241	1.2988674665169377e-4
negative	am6	e	r2	Hydroxyoctanoic acid	FALSE	FALSE	448511.6560344167	5.459828741824817e-4
negative	am6	e	r2	Cresol	FALSE	FALSE	25264.958522179986	3.075557677141507e-5
negative	am6	e	r2	Hydroxyphenyl pyruvate	FALSE	FALSE	78526.74903704965	9.559229857822206e-5
negative	am6	e	r2	3-Phenylbutyric acid	FALSE	FALSE	124728.63800954302	1.5183485057095367e-4
negative	am6	e	r2	Pyridoxic acid	FALSE	FALSE	21764.912339784514	2.649489536274938e-5
negative	am6	e	r2	2 3-dihydroxybenzoic acid	FALSE	FALSE	178524.83460191212	2.1732211637644626e-4
negative	am6	e	r2	5- Methylthioadenosine	FALSE	FALSE	5023.790088214327	6.115567599523531e-6
negative	am6	e	r2	Methylphenyllactate	FALSE	FALSE	367859.6807727472	4.478034920651935e-4
negative	am6	e	r2	Phenyl-pyruvate	FALSE	FALSE	341657.4518601042	4.159069559122638e-4
negative	am6	e	r2	Undecanoic acid	FALSE	FALSE	174674.059355267	2.1263448494322277e-4
negative	am6	e	r2	6-Phosphogluconate	FALSE	FALSE	20097.11556595681	2.4464650521003626e-5
negative	am6	e	r2	CDP	FALSE	FALSE	29897.717292314883	3.639513354698805e-5
negative	am6	e	r2	Carbamoyl phosphate	FALSE	FALSE	2212655.8952323114	0.0026935135553378966
negative	am6	e	r2	Citrulline	FALSE	FALSE	18461.7097790829	2.2473835923526223e-5
negative	am6	e	r2	Cytosine	FALSE	FALSE	51648.34414448258	6.287263887876902e-5
negative	am6	e	r2	N-acetyl-glutamine	FALSE	FALSE	38881.22077206172	4.733094532380424e-5
negative	am6	e	r2	Orotate	FALSE	FALSE	29543.597685118675	3.5964056141663e-5
negative	am6	e	r2	Phosphoenolpyruvate	FALSE	FALSE	489034.67941771174	5.953124210954778e-4
negative	am6	e	r2	Thymine	FALSE	FALSE	30130.91883621071	3.667901479619747e-5
negative	am6	e	r2	UDP	FALSE	FALSE	78270.97777893663	9.528094273103512e-5
negative	am6	e	r2	Xylose-5-phosphate	FALSE	FALSE	45487.535478986334	5.537295413876337e-5
negative	am6	e	r2	Ribulose-5-phosphate	FALSE	FALSE	84922.54493239406	1.0337803832130847e-4
negative	am6	e	r2	Succinyl-CoA	FALSE	FALSE	2529.469358382541	3.0791773900748803e-6
negative	am6	e	r2	Coenzyme A	FALSE	FALSE	25567.801818207612	3.112423442159523e-5
negative	am6	e	r2	Acetyl CoA	FALSE	FALSE	110727.33440078798	1.3479076290063674e-4
negative	am6	e	r2	Propionyl CoA	FALSE	FALSE	1192.2731255086105	1.4513796890615707e-6
negative	am6	e	r2	Butyryl CoA	FALSE	FALSE	7698.973680649837	9.37212605706265e-6
negative	am6	e	r2	Itaconic acid	FALSE	FALSE	366208.4072448818	4.4579336132572346e-4
negative	am6	e	r2	NegIS_Alanine-2H4-15N	TRUE	FALSE	85581137.55659437	0.10417975727116933
negative	am6	e	r2	NegIS_Glucose-2H7-13C6	TRUE	FALSE	12544849.548443392	0.015271114853970149
negative	am6	e	r2	NegIS_Glutamine-2H5-15N2	TRUE	FALSE	17581426.50429188	0.021402248182162624
negative	am6	e	r2	NegIS_Glycine-13C2_15N1	TRUE	FALSE	2048276.7222560314	0.0024934112567469276
negative	am6	e	r2	NegIS_Inosine-15N4	TRUE	FALSE	1427841.1327597196	0.0017381416849516639
negative	am6	e	r2	NegIS_Lysine-2H8	TRUE	FALSE	156757.45846758588	1.90824221783672e-4
negative	am6	e	r2	NegIS_Malate-2H3	TRUE	FALSE	10017604.386234105	0.01219464502567896
negative	am6	e	r2	NegIS_Serine-13C3-15N1	TRUE	FALSE	539414.2936932306	6.566406078488715e-4
negative	am6	e	r2	NegIS_Thymine-2H4	TRUE	FALSE	2573998.4890866894	0.003133383657492003
negative	ap1	e	r1	GTP	FALSE	FALSE	26836.325894122012	2.1136768941170224e-5
negative	ap1	e	r1	CTP	FALSE	FALSE	43959.72594366217	3.462346424224449e-5
negative	ap1	e	r1	UTP	FALSE	FALSE	168049.867966568	1.323590734371547e-4
negative	ap1	e	r1	Fructose-1 6-bisphosphate	FALSE	FALSE	127688.55799727394	1.0056978579958072e-4
negative	ap1	e	r1	Thiamine pyrophosphate	FALSE	FALSE	396889.64433932374	3.125973630161109e-4
negative	ap1	e	r1	ATP	FALSE	FALSE	947939.6930644137	7.466142102132888e-4
negative	ap1	e	r1	Glutathione disulfide	FALSE	FALSE	2640004.634624079	0.0020793147387545277
negative	ap1	e	r1	Lysine	FALSE	FALSE	275110.11430193885	2.1668163303429936e-4
negative	ap1	e	r1	NADP+	FALSE	FALSE	583088.0450461862	4.5925054454638896e-4
negative	ap1	e	r1	Pyridoxamine 5-phosphate	FALSE	FALSE	13422.649702307603	1.057191831904548e-5
negative	ap1	e	r1	Arginine	FALSE	FALSE	188586.9042941251	1.4853440955822452e-4
negative	ap1	e	r1	Ornithine	FALSE	FALSE	30025.796609369376	2.3648852965592452e-5
negative	ap1	e	r1	NADPH	FALSE	FALSE	119313.4888141429	9.39734319287653e-5
negative	ap1	e	r1	Glucose-6-phosphate	FALSE	FALSE	1537164.7391569002	0.0012106983662465533
negative	ap1	e	r1	ADP	FALSE	FALSE	2536754.0165921613	0.0019979927103597364
negative	ap1	e	r1	Isocitrate	FALSE	FALSE	743149020.4800309	0.5853174237306412
negative	ap1	e	r1	GMP	FALSE	FALSE	260460.77232190192	2.0514354999737937e-4
negative	ap1	e	r1	CMP	FALSE	FALSE	366757.7727999451	2.888649635436343e-4
negative	ap1	e	r1	Aconitate	FALSE	FALSE	4652704.442579268	0.0036645530070826267
negative	ap1	e	r1	UDP-D-Glucose	FALSE	FALSE	9797266.319911858	0.007716501702807372
negative	ap1	e	r1	UMP	FALSE	FALSE	883306.4435072577	6.957079100291109e-4
negative	ap1	e	r1	NAD+	FALSE	FALSE	4333929.570616223	0.0034134802320866355
negative	ap1	e	r1	ADP-D-Glucose	FALSE	FALSE	1672.2299437118998	1.3170781304487842e-6
negative	ap1	e	r1	Dihydroxyacetone phosphate	FALSE	FALSE	49516.51970008387	3.9000094118726524e-5
negative	ap1	e	r1	UDP-N-acetyl-glucosamine	FALSE	FALSE	4210171.6589477	0.0033160062934446738
negative	ap1	e	r1	5-Aminoimidazole-4-carboxamide ribonucleotide	FALSE	FALSE	31427.347975366607	2.475273982026631e-5
negative	ap1	e	r1	Glycerol-3-phosphate	FALSE	FALSE	291714.189173305	2.297592985620841e-4
negative	ap1	e	r1	AMP	FALSE	FALSE	2003975.7476603312	0.0015783670428328972
negative	ap1	e	r1	Deoxyribose phosphate	FALSE	FALSE	69108.31436687653	5.443094104794607e-5
negative	ap1	e	r1	N-carbomoyl-L-aspartate	FALSE	FALSE	20115436.31397973	0.01584327643049457
negative	ap1	e	r1	Tartaric acid	FALSE	FALSE	146217.36476966497	1.1516340450315299e-4
negative	ap1	e	r1	Malate	FALSE	FALSE	49161493.95038945	0.0387204695058394
negative	ap1	e	r1	Aminoadipic acid	FALSE	FALSE	96831.86023611139	7.626650026644179e-5
negative	ap1	e	r1	Galacturonic acid	FALSE	FALSE	75336.21764847205	5.933614875672088e-5
negative	ap1	e	r1	NADH	FALSE	FALSE	172128.1084529831	1.3557116838591824e-4
negative	ap1	e	r1	Glutathione	FALSE	FALSE	12856840.209116077	0.010126276670129249
negative	ap1	e	r1	Aspartate	FALSE	FALSE	3569908.576094482	0.0028117236693171307
negative	ap1	e	r1	Glutamate	FALSE	FALSE	99554306.60673185	0.07841074758694165
negative	ap1	e	r1	Malonic acid	FALSE	FALSE	8421599.418031607	0.006633001913761094
negative	ap1	e	r1	2-Hydroxyglutarate	FALSE	FALSE	19706661.34109183	0.01552131797072057
negative	ap1	e	r1	N-Acetylaspartate	FALSE	FALSE	3993154.0521509214	0.003145079355490252
negative	ap1	e	r1	FAD	FALSE	FALSE	52641.01378071487	4.146100138676715e-5
negative	ap1	e	r1	Glucuronic acid	FALSE	FALSE	61169.68497288594	4.8178334939629504e-5
negative	ap1	e	r1	Succinate	FALSE	FALSE	34061471.27746033	0.026827422316617357
negative	ap1	e	r1	N-acetyl-glutamate	FALSE	FALSE	1351894.388854559	0.0010647761337680762
negative	ap1	e	r1	Inositol	FALSE	FALSE	31666.810599201326	2.494134485398106e-5
negative	ap1	e	r1	Glycerophosphocholine (+HAc)	FALSE	FALSE	59475.31781885258	4.6843821147480496e-5
negative	ap1	e	r1	Acetyllysine	FALSE	FALSE	392040.60991479317	3.087781770133976e-4
negative	ap1	e	r1	N-acetyl-L-ornithine	FALSE	FALSE	125272.4929134951	9.866684984537666e-5
negative	ap1	e	r1	Fumarate	FALSE	FALSE	2518142.3531306586	0.0019833338322499438
negative	ap1	e	r1	a-ketoglutarate	FALSE	FALSE	598180.1981991454	4.7113739356131776e-4
negative	ap1	e	r1	Asparagine	FALSE	FALSE	367473.14717911877	2.894284051644688e-4
negative	ap1	e	r1	Serine	FALSE	FALSE	347600.2080279171	2.7377612382468644e-4
negative	ap1	e	r1	S-adenosyl-L-homocysteine	FALSE	FALSE	11807.035147827206	9.299431478977576e-6
negative	ap1	e	r1	Glutamine	FALSE	FALSE	6188708.269691009	0.00487433701829577
negative	ap1	e	r1	Histidine	FALSE	FALSE	23075.17176730039	1.81744168649432e-5
negative	ap1	e	r1	Methionine sulfoxide	FALSE	FALSE	7324.039591625189	5.768544217823491e-6
negative	ap1	e	r1	Glycine	FALSE	FALSE	56041.84032467004	4.413955303173444e-5
negative	ap1	e	r1	Threonine	FALSE	FALSE	916581.6745459171	7.219160755098502e-4
negative	ap1	e	r1	Alanine	FALSE	FALSE	1158951.7253470505	9.128110505617564e-4
negative	ap1	e	r1	Threonic acid	FALSE	FALSE	175277.40883714208	1.380516135410759e-4
negative	ap1	e	r1	Glucose	FALSE	FALSE	1328440.8085504104	0.0010463036755900157
negative	ap1	e	r1	Thiamine	FALSE	FALSE	28470671.93425893	0.022424009033445932
negative	ap1	e	r1	Proline	FALSE	FALSE	230755.08513109892	1.817468209194914e-4
negative	ap1	e	r1	Sorbitol	FALSE	FALSE	886052.8447502406	6.978710246343552e-4
negative	ap1	e	r1	Pipecolic acid	FALSE	FALSE	7567.013173190162	5.959914544469892e-6
negative	ap1	e	r1	Pyridoxamine	FALSE	FALSE	7928.9957851775525	6.245018506185254e-6
negative	ap1	e	r1	Valine	FALSE	FALSE	476768.8403913256	3.7551164259442714e-4
negative	ap1	e	r1	Tyrosine	FALSE	FALSE	229564.1338290668	1.80808806431571e-4
negative	ap1	e	r1	Glycerate	FALSE	FALSE	207627.11506485194	1.6353081917255935e-4
negative	ap1	e	r1	Acetyl glycine	FALSE	FALSE	60978.40952640154	4.8027682986287954e-5
negative	ap1	e	r1	Methionine	FALSE	FALSE	163649.929998961	1.2889360381423729e-4
negative	ap1	e	r1	Pantothenate	FALSE	FALSE	44191.8413861975	3.4806282504919616e-5
negative	ap1	e	r1	Isoleucine	FALSE	FALSE	373933.6538020083	2.9451681541368355e-4
negative	ap1	e	r1	D-Xylose	FALSE	FALSE	51215.966741187374	4.033860892053954e-5
negative	ap1	e	r1	Xanthine	FALSE	FALSE	15445.018754818597	1.2164772256851514e-5
negative	ap1	e	r1	Lactate	FALSE	FALSE	25602881.48024613	0.02016528612043201
negative	ap1	e	r1	N-Acetyl-L-alanine	FALSE	FALSE	95166.82440742182	7.495508834930266e-5
negative	ap1	e	r1	Leucine	FALSE	FALSE	316034.478571436	2.4891439228164877e-4
negative	ap1	e	r1	Pterin	FALSE	FALSE	157041.11172023288	1.236883806595187e-4
negative	ap1	e	r1	Phenylalanine	FALSE	FALSE	528939.7111020184	4.166023509135234e-4
negative	ap1	e	r1	Guanine	FALSE	FALSE	7262.181682404025	5.719823825190384e-6
negative	ap1	e	r1	Tryptophan	FALSE	FALSE	137642.69716123395	1.0840984335242778e-4
negative	ap1	e	r1	Acetylcholine	FALSE	FALSE	1812.8021859166292	1.4277953357303902e-6
negative	ap1	e	r1	2-Hydroxybutyric acid	FALSE	FALSE	2064255.8783973795	0.0016258447489898194
negative	ap1	e	r1	Nicotinate	FALSE	FALSE	83654.03047733592	6.588740650166074e-5
negative	ap1	e	r1	5-Methylcytosine	FALSE	FALSE	2774.1158057740304	2.184943089230296e-6
negative	ap1	e	r1	Creatinine	FALSE	FALSE	34593.80134919963	2.724669497604108e-5
negative	ap1	e	r1	Hypoxanthine	FALSE	FALSE	1550.6666197908805	1.2213326882605893e-6
negative	ap1	e	r1	Acetyl-Methionine	FALSE	FALSE	5763.213197693749	4.53920951023467e-6
negative	ap1	e	r1	Uridine	FALSE	FALSE	7035.4809594201215	5.54127029221378e-6
negative	ap1	e	r1	Hydroxyphenyllactic acid	FALSE	FALSE	11325.7469395056	8.920360301591413e-6
negative	ap1	e	r1	2-Hydroxy-3-methylbutyric acid	FALSE	FALSE	2317811.840527272	0.0018255499473221106
negative	ap1	e	r1	Pyruvate	FALSE	FALSE	1752206.709948891	0.0013800692580451118
negative	ap1	e	r1	Adenine	FALSE	FALSE	152762.58401026993	1.2031853592105957e-4
negative	ap1	e	r1	Acetyl leucine	FALSE	FALSE	140298.47360154806	1.1050158024665807e-4
negative	ap1	e	r1	Phenylethanolamine	FALSE	FALSE	1689046.072776861	0.0013303228136417556
negative	ap1	e	r1	1-Methyladenosine	FALSE	FALSE	68051.5065234117	5.3598580340647274e-5
negative	ap1	e	r1	3 4-Dimethoxyphenylacetic acid	FALSE	FALSE	442735.62514861266	3.487064752347664e-4
negative	ap1	e	r1	Hydroxy-methoxycinnamic acid	FALSE	FALSE	372683.7719833031	2.9353238619971543e-4
negative	ap1	e	r1	4-Hydroxy-3-methylbenzoic acid	FALSE	FALSE	713328.7344809121	5.618304345872784e-4
negative	ap1	e	r1	Phenylacetylglycine	FALSE	FALSE	44211.14687039298	3.482148784861484e-5
negative	ap1	e	r1	Leucic acid	FALSE	FALSE	1297626.6536476305	0.0010220338975709558
negative	ap1	e	r1	Phenylpropanolamine	FALSE	FALSE	14693.329401409392	1.1572728314575941e-5
negative	ap1	e	r1	Acetyl-Phenylalanine	FALSE	FALSE	32834.094028141815	2.5860718102901696e-5
negative	ap1	e	r1	2-hydroxy pyridine	FALSE	FALSE	35532.3272270581	2.7985894697488358e-5
negative	ap1	e	r1	Phenyllactic acid	FALSE	FALSE	166111.03483476816	1.308320138804918e-4
negative	ap1	e	r1	Hydroxyoctanoic acid	FALSE	FALSE	712008.3560749745	5.607904810037916e-4
negative	ap1	e	r1	Cresol	FALSE	FALSE	43373.3768694162	3.4161645252934905e-5
negative	ap1	e	r1	Hydroxyphenyl pyruvate	FALSE	FALSE	125651.91551442596	9.89656898534528e-5
negative	ap1	e	r1	3-Phenylbutyric acid	FALSE	FALSE	539855.4891516746	4.251998124050466e-4
negative	ap1	e	r1	Pyridoxic acid	FALSE	FALSE	34000.43035949301	2.677934540086807e-5
negative	ap1	e	r1	2 3-dihydroxybenzoic acid	FALSE	FALSE	5902036.179350832	0.004648548966708209
negative	ap1	e	r1	5- Methylthioadenosine	FALSE	FALSE	227743.7452957931	1.7937503595334808e-4
negative	ap1	e	r1	Methylphenyllactate	FALSE	FALSE	338971.64195667295	2.66980111283288e-4
negative	ap1	e	r1	Phenyl-pyruvate	FALSE	FALSE	290999.7140585092	2.2919656521791339e-4
negative	ap1	e	r1	Undecanoic acid	FALSE	FALSE	252101.74639793718	1.985598320836394e-4
negative	ap1	e	r1	6-Phosphogluconate	FALSE	FALSE	317267.37960002903	2.498854471224461e-4
negative	ap1	e	r1	CDP	FALSE	FALSE	158393.17484552495	1.2475328969311462e-4
negative	ap1	e	r1	Carbamoyl phosphate	FALSE	FALSE	2090873.1473157285	0.001646808984749654
negative	ap1	e	r1	Citrulline	FALSE	FALSE	196297.828467689	1.546076709734618e-4
negative	ap1	e	r1	Cytosine	FALSE	FALSE	64582.929018568306	5.0866666830442295e-5
negative	ap1	e	r1	N-acetyl-glutamine	FALSE	FALSE	236318.11633831094	1.8612836352347036e-4
negative	ap1	e	r1	Orotate	FALSE	FALSE	144587.9168503949	1.1388002225823748e-4
negative	ap1	e	r1	Phosphoenolpyruvate	FALSE	FALSE	7691418.268211425	0.006057898216263977
negative	ap1	e	r1	Thymine	FALSE	FALSE	33711.45079502602	2.65517399415009e-5
negative	ap1	e	r1	UDP	FALSE	FALSE	969987.5126799422	7.639794661990978e-4
negative	ap1	e	r1	Xylose-5-phosphate	FALSE	FALSE	197892.87474118793	1.5586395786856193e-4
negative	ap1	e	r1	Ribulose-5-phosphate	FALSE	FALSE	456161.6901422267	3.592810834981618e-4
negative	ap1	e	r1	Succinyl-CoA	FALSE	FALSE	613330.3539044718	4.8306992642105535e-4
negative	ap1	e	r1	Coenzyme A	FALSE	FALSE	1624435.3622290103	0.0012794342655833245
negative	ap1	e	r1	Acetyl CoA	FALSE	FALSE	849039.6873923033	6.687188017129138e-4
negative	ap1	e	r1	Propionyl CoA	FALSE	FALSE	186070.18856653012	1.4655219936169253e-4
negative	ap1	e	r1	Butyryl CoA	FALSE	FALSE	23754.269438808806	1.870928630376992e-5
negative	ap1	e	r1	Itaconic acid	FALSE	FALSE	318192.79917791276	2.506143240882624e-4
negative	ap1	e	r1	NegIS_Alanine-2H4-15N	TRUE	FALSE	76632715.80185878	0.06035729382735782
negative	ap1	e	r1	NegIS_Glucose-2H7-13C6	TRUE	FALSE	10980244.78223762	0.008648236639967201
negative	ap1	e	r1	NegIS_Glutamine-2H5-15N2	TRUE	FALSE	17606209.353990175	0.013866964520902247
negative	ap1	e	r1	NegIS_Glycine-13C2_15N1	TRUE	FALSE	2143931.1806016793	0.0016885984381369264
negative	ap1	e	r1	NegIS_Inosine-15N4	TRUE	FALSE	1184596.2963411794	9.330091720869188e-4
negative	ap1	e	r1	NegIS_Lysine-2H8	TRUE	FALSE	170752.3678879571	1.3448761057846447e-4
negative	ap1	e	r1	NegIS_Malate-2H3	TRUE	FALSE	16908862.35559811	0.013317721586717277
negative	ap1	e	r1	NegIS_Serine-13C3-15N1	TRUE	FALSE	622889.5246737357	4.905988998213736e-4
negative	ap1	e	r1	NegIS_Thymine-2H4	TRUE	FALSE	1741084.5315912487	0.001371309231989553
negative	ap1	e	r2	GTP	FALSE	FALSE	33780.890384269085	3.069761619133609e-5
negative	ap1	e	r2	CTP	FALSE	FALSE	44925.32127021178	4.082486441114179e-5
negative	ap1	e	r2	UTP	FALSE	FALSE	145960.91159226303	1.3263866026110894e-4
negative	ap1	e	r2	Fructose-1 6-bisphosphate	FALSE	FALSE	61688.39582650394	5.6057927337021275e-5
negative	ap1	e	r2	Thiamine pyrophosphate	FALSE	FALSE	376313.84494483005	3.4196665180210293e-4
negative	ap1	e	r2	ATP	FALSE	FALSE	907204.3645694889	8.24401342707879e-4
negative	ap1	e	r2	Glutathione disulfide	FALSE	FALSE	864002.456358071	7.851425907353432e-4
negative	ap1	e	r2	Lysine	FALSE	FALSE	1509575.7807811392	0.0013717926734025776
negative	ap1	e	r2	NADP+	FALSE	FALSE	374978.4322795299	3.40753125900621e-4
negative	ap1	e	r2	Pyridoxamine 5-phosphate	FALSE	FALSE	12734.287828484305	1.1571994573916026e-05
negative	ap1	e	r2	Arginine	FALSE	FALSE	80685.71388281416	7.33213082521945e-5
negative	ap1	e	r2	Ornithine	FALSE	FALSE	9495.243592065513	8.62858675768375e-6
negative	ap1	e	r2	NADPH	FALSE	FALSE	223606.28194360196	2.0319712544559972e-4
negative	ap1	e	r2	Glucose-6-phosphate	FALSE	FALSE	2031637.7522230016	0.0018462046218477698
negative	ap1	e	r2	ADP	FALSE	FALSE	1590926.6936781388	0.0014457184661368575
negative	ap1	e	r2	Isocitrate	FALSE	FALSE	746804497.0084202	0.6786416094527792
negative	ap1	e	r2	GMP	FALSE	FALSE	128559.28756157689	1.1682533001660205e-4
negative	ap1	e	r2	CMP	FALSE	FALSE	287355.0310239979	2.611273519638172e-4
negative	ap1	e	r2	Aconitate	FALSE	FALSE	7592543.555438244	0.006899551353725767
negative	ap1	e	r2	UDP-D-Glucose	FALSE	FALSE	7026778.8517719	0.006385425540871465
negative	ap1	e	r2	UMP	FALSE	FALSE	381415.5812107447	3.4660273865531974e-4
negative	ap1	e	r2	NAD+	FALSE	FALSE	3036410.9252549824	0.0027592694012015437
negative	ap1	e	r2	ADP-D-Glucose	FALSE	TRUE	773.5865662597639	7.029792060446791e-7
negative	ap1	e	r2	Dihydroxyacetone phosphate	FALSE	FALSE	26821.042656989797	2.4373012788293338e-5
negative	ap1	e	r2	UDP-N-acetyl-glucosamine	FALSE	FALSE	2434449.7383285593	0.0022122508570439994
negative	ap1	e	r2	5-Aminoimidazole-4-carboxamide ribonucleotide	FALSE	FALSE	6741.568234851908	6.1262468764754185e-6
negative	ap1	e	r2	Glycerol-3-phosphate	FALSE	FALSE	121991.79233866205	1.1085726803250007e-4
negative	ap1	e	r2	AMP	FALSE	FALSE	782606.9143346462	7.111762422969841e-4
negative	ap1	e	r2	Deoxyribose phosphate	FALSE	FALSE	26489.219904594378	2.4071476405423727e-5
negative	ap1	e	r2	N-carbomoyl-L-aspartate	FALSE	FALSE	1665220.9957738891	0.001513231724224352
negative	ap1	e	r2	Tartaric acid	FALSE	FALSE	105148.32367133793	9.555114878583004e-5
negative	ap1	e	r2	Malate	FALSE	FALSE	10867277.956706882	0.009875391795916188
negative	ap1	e	r2	Aminoadipic acid	FALSE	FALSE	655921.6502828366	5.960538885424633e-4
negative	ap1	e	r2	Galacturonic acid	FALSE	FALSE	52494.28175348033	4.770298518415039e-5
negative	ap1	e	r2	NADH	FALSE	FALSE	171244.33406001393	1.556143956573509e-4
negative	ap1	e	r2	Glutathione	FALSE	FALSE	6273843.681251267	0.005701212821233859
negative	ap1	e	r2	Aspartate	FALSE	FALSE	2700586.1727459324	0.002454096291706659
negative	ap1	e	r2	Glutamate	FALSE	FALSE	48006803.10112811	0.043625090973260325
negative	ap1	e	r2	Malonic acid	FALSE	FALSE	9018062.050041607	0.008194958879199495
negative	ap1	e	r2	2-Hydroxyglutarate	FALSE	FALSE	10897207.000513896	0.009902589134094971
negative	ap1	e	r2	N-Acetylaspartate	FALSE	FALSE	789398.8002817886	7.173482142506244e-4
negative	ap1	e	r2	FAD	FALSE	FALSE	73902.10951147514	6.715686199229938e-5
negative	ap1	e	r2	Glucuronic acid	FALSE	FALSE	38966.29912294809	3.5409738502040315e-5
negative	ap1	e	r2	Succinate	FALSE	FALSE	16447469.985033926	0.014946264446428274
negative	ap1	e	r2	N-acetyl-glutamate	FALSE	FALSE	403064.8997191411	3.6627606469305556e-4
negative	ap1	e	r2	Inositol	FALSE	FALSE	42870.17684192796	3.8957298631804066e-5
negative	ap1	e	r2	Glycerophosphocholine (+HAc)	FALSE	FALSE	110099.70078926995	1.0005060018145168e-4
negative	ap1	e	r2	Acetyllysine	FALSE	FALSE	117445.41283462998	1.0672584901164665e-4
negative	ap1	e	r2	N-acetyl-L-ornithine	FALSE	FALSE	27028.927343927215	2.456192327167813e-5
negative	ap1	e	r2	Fumarate	FALSE	FALSE	744206.3896247982	6.762806384310253e-4
negative	ap1	e	r2	a-ketoglutarate	FALSE	FALSE	203685.4139766611	1.8509448954432095e-4
negative	ap1	e	r2	Asparagine	FALSE	FALSE	187387.59263752098	1.7028421490286656e-4
negative	ap1	e	r2	Serine	FALSE	FALSE	154864.30237459805	1.407294142326169e-4
negative	ap1	e	r2	S-adenosyl-L-homocysteine	FALSE	FALSE	4255.519138985381	3.8671062762836875e-6
negative	ap1	e	r2	Glutamine	FALSE	FALSE	4726713.101704099	0.004295293078190771
negative	ap1	e	r2	Histidine	FALSE	FALSE	16512.137098044994	1.5005029215291203e-5
negative	ap1	e	r2	Methionine sulfoxide	FALSE	FALSE	9314.556742349867	8.464391690582277e-6
negative	ap1	e	r2	Glycine	FALSE	FALSE	38317.526186012314	3.4820180844239366e-5
negative	ap1	e	r2	Threonine	FALSE	FALSE	327399.9225794632	2.9751723681912574e-4
negative	ap1	e	r2	Alanine	FALSE	FALSE	712445.9067418956	6.474190216263698e-4
negative	ap1	e	r2	Threonic acid	FALSE	FALSE	256410.15199471405	2.330068966199095e-4
negative	ap1	e	r2	Glucose	FALSE	FALSE	4130399.09276024	0.0037534062786468516
negative	ap1	e	r2	Thiamine	FALSE	FALSE	28772979.231907073	0.026146790777121745
negative	ap1	e	r2	Proline	FALSE	FALSE	120364.81109079903	1.0937878580988057e-4
negative	ap1	e	r2	Sorbitol	FALSE	FALSE	2224009.756898748	0.002021018307879088
negative	ap1	e	r2	Pipecolic acid	FALSE	FALSE	15546.859468232698	1.4127855112981004e-5
negative	ap1	e	r2	Pyridoxamine	FALSE	FALSE	10463.559703482702	9.508522011078199e-6
negative	ap1	e	r2	Valine	FALSE	FALSE	454581.27015613584	4.1309039519933465e-4
negative	ap1	e	r2	Tyrosine	FALSE	FALSE	140156.36082372593	1.2736390670580735e-4
negative	ap1	e	r2	Glycerate	FALSE	FALSE	267354.46574067924	2.4295229293804958e-4
negative	ap1	e	r2	Acetyl glycine	FALSE	FALSE	51565.80858882049	4.6859256302866795e-5
negative	ap1	e	r2	Methionine	FALSE	FALSE	89693.39540594463	8.150683406354538e-5
negative	ap1	e	r2	Pantothenate	FALSE	FALSE	58376.58795165485	5.3048397218510706e-5
negative	ap1	e	r2	Isoleucine	FALSE	FALSE	289411.50050440984	2.6299612185415376e-4
negative	ap1	e	r2	D-Xylose	FALSE	FALSE	48357.34335712349	4.394363646201896e-5
negative	ap1	e	r2	Xanthine	FALSE	FALSE	31975.461167872712	2.9056973433992746e-5
negative	ap1	e	r2	Lactate	FALSE	FALSE	10989288.985147119	0.009986266544318697
negative	ap1	e	r2	N-Acetyl-L-alanine	FALSE	FALSE	65308.289744068905	5.934742364308987e-5
negative	ap1	e	r2	Leucine	FALSE	FALSE	313044.2392832082	2.844718359732668e-4
negative	ap1	e	r2	Pterin	FALSE	FALSE	124089.13282351689	1.1276317851899827e-4
negative	ap1	e	r2	Phenylalanine	FALSE	FALSE	367734.70355660433	3.3417055209628824e-4
negative	ap1	e	r2	Guanine	FALSE	FALSE	12238.786869642197	1.1121719341855912e-5
negative	ap1	e	r2	Tryptophan	FALSE	FALSE	85259.29122406805	7.747744268933128e-5
negative	ap1	e	r2	Acetylcholine	FALSE	FALSE	1527.5223781910904	1.388101235816541e-6
negative	ap1	e	r2	2-Hydroxybutyric acid	FALSE	FALSE	2043273.6517970792	0.0018567784810652967
negative	ap1	e	r2	Nicotinate	FALSE	FALSE	135460.12477769	1.2309630895911616e-4
negative	ap1	e	r2	5-Methylcytosine	FALSE	FALSE	3358.6873053227228	3.0521307352372986e-6
negative	ap1	e	r2	Creatinine	FALSE	FALSE	18799.839597726	1.7083926855238276e-5
negative	ap1	e	r2	Hypoxanthine	FALSE	FALSE	5357.03725789616	4.8680858258894e-6
negative	ap1	e	r2	Acetyl-Methionine	FALSE	FALSE	2153.3696287329503	1.956825697279627e-6
negative	ap1	e	r2	Uridine	FALSE	FALSE	17341.711113328303	1.575888574286608e-5
negative	ap1	e	r2	Hydroxyphenyllactic acid	FALSE	FALSE	15828.2274339803	1.438354185547963e-5
negative	ap1	e	r2	2-Hydroxy-3-methylbutyric acid	FALSE	FALSE	2885044.566310681	0.0026217186635420064
negative	ap1	e	r2	Pyruvate	FALSE	FALSE	1004338.96715694	9.12670204635689e-4
negative	ap1	e	r2	Adenine	FALSE	FALSE	168961.76042589886	1.535401587573917e-4
negative	ap1	e	r2	Acetyl leucine	FALSE	FALSE	125106.48728654801	1.1368767625962666e-4
negative	ap1	e	r2	Phenylethanolamine	FALSE	FALSE	1871249.467445189	0.001700455414183641
negative	ap1	e	r2	1-Methyladenosine	FALSE	FALSE	133898.72218731898	1.2167741985068438e-4
negative	ap1	e	r2	3 4-Dimethoxyphenylacetic acid	FALSE	FALSE	657567.6163292982	5.975496227692254e-4
negative	ap1	e	r2	Hydroxy-methoxycinnamic acid	FALSE	FALSE	403557.47642500995	3.6672368257670366e-4
negative	ap1	e	r2	4-Hydroxy-3-methylbenzoic acid	FALSE	FALSE	600013.5887549365	5.452487085942079e-4
negative	ap1	e	r2	Phenylacetylglycine	FALSE	FALSE	31983.548555001187	2.9064322663194125e-5
negative	ap1	e	r2	Leucic acid	FALSE	FALSE	938258.845970945	8.526213967158932e-4
negative	ap1	e	r2	Phenylpropanolamine	FALSE	FALSE	53231.59330289207	4.837300029327909e-5
negative	ap1	e	r2	Acetyl-Phenylalanine	FALSE	FALSE	28756.178484748096	2.6131523480074593e-5
negative	ap1	e	r2	2-hydroxy pyridine	FALSE	FALSE	69580.32634320665	6.322953978579344e-5
negative	ap1	e	r2	Phenyllactic acid	FALSE	FALSE	154929.43554042597	1.407886025163823e-4
negative	ap1	e	r2	Hydroxyoctanoic acid	FALSE	FALSE	769363.8864488987	6.991419417612839e-4
negative	ap1	e	r2	Cresol	FALSE	FALSE	58634.98453955589	5.328320924360258e-5
negative	ap1	e	r2	Hydroxyphenyl pyruvate	FALSE	FALSE	132983.44242962802	1.2084568017805632e-4
negative	ap1	e	r2	3-Phenylbutyric acid	FALSE	FALSE	206078.99499511896	1.8726960188125637e-4
negative	ap1	e	r2	Pyridoxic acid	FALSE	FALSE	43097.75454498046	3.9164104695899546e-5
negative	ap1	e	r2	2 3-dihydroxybenzoic acid	FALSE	FALSE	2388211.838696541	0.0021702332168855804
negative	ap1	e	r2	5- Methylthioadenosine	FALSE	FALSE	115814.17085880203	1.052434949493487e-4
negative	ap1	e	r2	Methylphenyllactate	FALSE	FALSE	732858.2776655675	6.659682996661774e-4
negative	ap1	e	r2	Phenyl-pyruvate	FALSE	FALSE	686102.4996857394	6.234800493321819e-4
negative	ap1	e	r2	Undecanoic acid	FALSE	FALSE	286989.85351112916	2.6079550520062555e-4
negative	ap1	e	r2	6-Phosphogluconate	FALSE	FALSE	88322.90312783212	8.026143036138959e-5
negative	ap1	e	r2	CDP	FALSE	FALSE	84517.36483793314	7.680323395224008e-5
negative	ap1	e	r2	Carbamoyl phosphate	FALSE	FALSE	2478254.4196068984	0.0022520573653381816
negative	ap1	e	r2	Citrulline	FALSE	FALSE	67331.5529612289	6.118601809657852e-5
negative	ap1	e	r2	Cytosine	FALSE	FALSE	95640.38927828422	8.69110295512499e-5
negative	ap1	e	r2	N-acetyl-glutamine	FALSE	FALSE	89283.46311515273	8.113431741333224e-5
negative	ap1	e	r2	Orotate	FALSE	FALSE	101950.66446820501	9.264534867778497e-5
negative	ap1	e	r2	Phosphoenolpyruvate	FALSE	FALSE	5666746.489469405	0.005149527049421401
negative	ap1	e	r2	Thymine	FALSE	FALSE	27793.391039107977	2.525661227602118e-5
negative	ap1	e	r2	UDP	FALSE	FALSE	654602.4580832468	5.948551026204536e-4
[truncated: 14,185 more rows]
